# Supplementary material for: Reaction kinetics of hydrogen abstraction from polycyclic aromatic hydrocarbons by H atoms
Source: Royal Society of Chemistry journal article supplement (doi:10.1039/c7cp04964a), 2017-01-01
Supplement: c7cp04964a1.pdf [file c7cp04964a1.pdf]

Supporting Information for

## Reaction Kinetics of Hydrogen Abstraction from Polycyclic Aromatic Hydrocarbons by

### H atoms

Dingyu Hou<sup>a,b</sup>, Xiaoqing You<sup>a, b\*</sup>

<sup>a</sup>Center for Combustion Energy, Tsinghua University, Beijing, 100084, China

<sup>b</sup>Key Laboratory for Thermal Science and Power Engineering of Ministry of Education, Tsinghua

#### In this supporting information, we present:

- **Table S1.** Comparison of single point energy by CCSD(T)-F12a/cc-PVTZ with geometries optimized by different DFT method and basis sets.
- **Eq.(1) ~ Eq.(4)** CCSD(T)/CBS extrapolation equations
- **Table S2.** Comparison of bond dissociation energy (BDE) of C-H bond in benzene (A1) and naphthalene (A2) obtained by experiments and calculated at CCSD(T)/CBS level.
- **Table S3.** The barrier height ( $\Delta E_0^\ddagger$ ) and reaction energy ( $\Delta H_{298}$ ) of R1 calculated using several compound methods and the error deviated from the benchmark CCSD(T)/CBS value. (units: kcal/mol)
- **Table S4.** The barrier height ( $\Delta E_0^\ddagger$ ) and reaction energy ( $\Delta H_{298}$ ) of R2 calculated using several compound methods and the error deviated from the benchmark CCSD(T)/CBS value. (units: kcal/mol)
- **Table S5.** Total energies, relative energies, zero-point energies, expectation values of S2 operator (projected values are in parentheses), vibrational frequencies, rotational constants for all optimized structures at B3LYP/6-311G(d,p) level in this work.
- **Table S6.** Cartesian coordinates of optimized structures at B3LYP/6-311G(d,p) level for all species in this work.

**Table S1.** Comparison of single point energy by CCSD(T)-F12a/cc-PVTZ with geometries optimized by different DFT method and basis sets. (Energy unit: kcal/mol; Single point energy obtained by CCSD(T)-F12a/cc-PVTZ//B3LYP/6-311g(d,p) are taken as reference values)

| DFT methods/basis set   | C <sub>6</sub> H <sub>6</sub> (R) | C <sub>6</sub> H <sub>7</sub> (TS) | C <sub>6</sub> H <sub>5</sub> (P) |
|-------------------------|-----------------------------------|------------------------------------|-----------------------------------|
| B3LYP/6-311g(d,p)       | 0.0                               | 0.0                                | 0.0                               |
| B3LYP/6-311++g(d,p)     | 0.0                               | 0.0                                | 0.0                               |
| B3LYP/6-311+g(3df,2p)   | 0.0                               | 0.1                                | 0.0                               |
| B3LYP/6-311++g(3df,2p)  | 0.0                               | 0.0                                | 0.0                               |
| B3LYP/def2TZVP          | 0.0                               | 0.1                                | 0.0                               |
| M06-2X/6-311g(d,p)      | 0.0                               | 0.0                                | 0.0                               |
| M06-2X/6-311++g(d,p)    | 0.0                               | 0.0                                | 0.0                               |
| M06-2X/6-311+g(3df,2p)  | 0.1                               | 0.1                                | 0.1                               |
| M06-2X/6-311++g(3df,2p) | 0.1                               | 0.1                                | 0.1                               |
| M06-2X/def2TZVP         | 0.1                               | 0.1                                | 0.1                               |
| M06-L/6-311g(d,p)       | 0.0                               | -0.5                               | 0.1                               |
| M06-L/6-311++g(d,p)     | 0.0                               | -0.5                               | 0.1                               |
| M06-L/6-311+g(3df,2p)   | 0.1                               | -0.5                               | 0.1                               |
| M06-L/6-311++g(3df,2p)  | 0.1                               | -0.5                               | 0.1                               |
| M06-L/def2TZVP          | 0.2                               | -0.4                               | 0.2                               |

Three kinds of density functional methods and five basis sets containing different number of basis functions were combined to optimize geometries and calculate harmonic vibrational frequencies of the reactants, transition states and products of R1. Table S1 shows the single-point energy of C<sub>6</sub>H<sub>6</sub>, TS (C<sub>6</sub>H<sub>7</sub>), and C<sub>6</sub>H<sub>5</sub> calculated by CCSD(T)-F12a/cc-PVTZ using different geometries relative to the single-point energy obtained by CCSD(T)-F12a/cc-PVTZ//B3LYP/6-311g(d,p). It is clear that differences are small, within 0.5 kcal/mol for any given species, so geometries are not sensitive of the chosen density functional methods or basis sets.

In addition, we have investigated the spin contamination of wave function. All  $\langle S^2 \rangle$  values for the TS (C<sub>6</sub>H<sub>7</sub>) are very close to 0.75 regardless of the DFT methods used for optimization, indicating only mild spin contamination. More specifically,

the  $\langle S^2 \rangle$  of the TS and C<sub>6</sub>H<sub>5</sub> are 0.7604 and 0.7571 respectively, by B3LYP/6-311g(d,p), which is the most closest to 0.75 among the three DFT methods. Considering the limited influence of the level of theory on the optimized geometries and the good performance of B3LYP/6-311g(d,p) on spin contamination of radicals, we employed it to optimize geometries and calculate frequencies for all of the reaction systems.

#### Eq.(1) ~ Eq.(4) CCSD(T)/CBS extrapolation equations

The benchmark energy calculations in our work were performed using CCSD(T)/CBS (extrapolation to the limit of a complete basis set), based on the following equations<sup>(1, 2)</sup>

$$E(\text{CCSD(T) / CBS}) = E_{\text{CBS}}^{\text{corr}} + E_{\text{CBS}}^{\text{HF}} \quad (1)$$

$$E_{\text{CBS}}^{\text{corr}} = \frac{X^3 E_X^{\text{corr}} - (X-1)^3 E_{X-1}^{\text{corr}}}{X^3 - (X-1)^3} \quad (2)$$

$$E_{\text{CBS}}^{\text{HF}} = \frac{E_{X-1}^{\text{HF}} - \lambda E_X^{\text{HF}}}{1 - \lambda} \quad (3)$$

where

$$\lambda = \frac{X}{X+1} \exp[9(\sqrt{X} - \sqrt{X-1})] \quad (4)$$

In the above equations, X and X-1 represent a pair of basis sets with successive cardinalities, which are cc-PVTZ (X = 3) and cc-PVDZ (X - 1 = 2) respectively in our study. “corr” stands for correlation energies, and “HF” represents Hartree-Fock energies. Eq.(3) is derived from the Karton-Martin two-point formula,<sup>(3)</sup> which has also been employed in the extrapolation of CCSD(T) results to the CBS limits.<sup>(1, 2)</sup> Energies computed at CCSD(T)/CBS level are believed to be accurate within 1 kcal/mol, and are often regarded as benchmark value to test various of density functional methods,<sup>(1, 2, 4)</sup> especially when experimental results are not available. Unfortunately, this gold standard method can hardly be applied to a system with more than 10 non-hydrogen atoms due to its enormous computational cost.<sup>(5)</sup>

**Table S2.** Comparison of bond dissociation energy (BDE) of C-H bond in benzene (A1) and naphthalene (A2) obtained by experiments and calculated at CCSD(T)/CBS level.

|             | BDE of C-H (kcal/mol)          |                                |
|-------------|--------------------------------|--------------------------------|
|             | A1                             | A2 ( $\alpha$ )                |
| CCSD(T)/CBS | 111.4                          | 111.9                          |
| experiment  | 112.0 $\pm$ 0.6 <sup>(6)</sup> | 112.3 $\pm$ 1.3 <sup>(7)</sup> |

Note: A2- $\alpha$  represents the same site as A2-1 in Fig. 2.

**Table S3.** The barrier height ( $\Delta E_0^\ddagger$ ) and reaction energy ( $\Delta H_{298}$ ) of R1 calculated using several compound methods and the error deviated from the benchmark CCSD(T)/CBS value. (units: kcal/mol)

| Methods     | $\Delta E_0^\ddagger$ | $\Delta H_{298}$ | Error                 |                  |
|-------------|-----------------------|------------------|-----------------------|------------------|
|             |                       |                  | $\Delta E_0^\ddagger$ | $\Delta H_{298}$ |
| CCSD(T)/CBS | 15.6                  | 7.9              | 0.0                   | 0.0              |
| G4          | 15.7                  | 7.5              | 0.1                   | -0.4             |
| G4MP2       | 15.8                  | 7.3              | 0.2                   | -0.6             |
| G3          | 16.9                  | 9.2              | 1.3                   | 1.3              |
| G3(MP2,CC)  | 17.1                  | 8.8              | 1.5                   | 0.9              |
| CBS-QB3     | 17.3                  | 9.5              | 1.7                   | 1.6              |
| G3MP2       | 17.9                  | 9.8              | 2.3                   | 1.9              |
| G3MP2B3     | 18.0                  | 9.4              | 2.4                   | 1.5              |

**Table S4.** The barrier height ( $\Delta E_0^\ddagger$ ) and reaction energy ( $\Delta H_{298}$ ) of R2 calculated using several compound methods and the error deviated from the benchmark CCSD(T)/CBS value. (units: kcal/mol)

| Methods     | $\Delta E_0^\ddagger$ | $\Delta H_{298}$ | Error                 |                  |
|-------------|-----------------------|------------------|-----------------------|------------------|
|             |                       |                  | $\Delta E_0^\ddagger$ | $\Delta H_{298}$ |
| CCSD(T)/CBS | 15.7                  | 8.3              | 0.0                   | 0.0              |
| G3MP2B3     | 15.6                  | 7.2              | 0.1                   | -1.1             |
| G3          | 15.4                  | 8.2              | -0.3                  | -0.1             |
| G3MP2       | 15.2                  | 7.6              | -0.5                  | -0.7             |
| CBS-QB3     | 14.9                  | 7.4              | -0.8                  | -0.9             |
| G4          | 13.6                  | 5.7              | -2.1                  | -2.6             |
| G4MP2       | 12.1                  | 3.9              | -3.6                  | -4.4             |
| G3(MP2,CC)  | 21.1                  | 13.1             | 5.4                   | 4.8              |

## Reference

- Zhao Y, Ng HT, Peverati R, Truhlar DG. Benchmark database for ylidic bond dissociation energies and its use for assessments of electronic structure methods. *J. Chem. Theory Comput.*, 2012;8:2824-34.
- Bao JL, Yu HS, Duanmu K, Makeev MA, Xu X, Truhlar DG. Density functional theory of the water splitting reaction on Fe(0): Comparison of local and nonlocal correlation functionals. *ACS Catal.*, 2015;5:2070-80.
- Karton A, Martin JML. Comment on: "Estimating the Hartree-Fock limit from finite basis set calculations" [Jensen F (2005) *Theor Chem Acc* 113:267]. *Theor Chem Acc.*, 2006;115:330-3.
- Karton A. How reliable is DFT in predicting relative energies of polycyclic aromatic hydrocarbon isomers? comparison of functionals from different rungs of jacob's ladder. *J Comput Chem.*, 2017;38(6):370-82.
- Zhang L, Zhang P. Towards high-level theoretical studies of large biodiesel molecules: an ONIOM [QCISD(T)/CBS:DFT] study of hydrogen abstraction reactions of C(n)H(2n+1)COOC(m)H(2m+1) + H. *Phys. Chem. Chem. Phys.*, 2015;17(1):200-8.
- Davico GE, Bierbaum VM, DePuy CH, Ellison GB, Squires RR. The C-H bond energy of benzene. *J. Am. Chem. Soc.*, 1995;117:2590-9.
- Reed DR, Kass SR. Experimental determination of the  $\alpha$  and  $\beta$  C—H bond dissociation energies in naphthalene. *J. Mass Spectrom.*, 2000;35:534-9.

**Table S5.** Total energies, relative energies, zero-point energies, expectation values of S2 operator (projected values are in parentheses), vibrational frequencies, rotational constants for all optimized structures at B3LYP/6-311G(d,p) level in this work.

| Species | Symmetry number | Total Energy (hartrees) | ZPE (unscaled) (hartrees) | $\langle S^2 \rangle$ | Frequencies (unscaled) (cm-1)                                                                                                                                                                                                              | Rotational constants (GHz) |
|---------|-----------------|-------------------------|---------------------------|-----------------------|--------------------------------------------------------------------------------------------------------------------------------------------------------------------------------------------------------------------------------------------|----------------------------|
| H       | 1               | -0.502155               | 0                         | 0.75 (0.75)           |                                                                                                                                                                                                                                            |                            |
| H2      | 1               | -1.169626               | 0.010069                  | 0                     | 4420.0                                                                                                                                                                                                                                     | 1811.2                     |
| A1      | 12              | -232.209591             | 0.100179                  | 0                     | 412.3 412.5 623.0 623.1 688.5<br>723.2 861.7 862.8 980.9 981.7<br>1013.7 1016.5 1023.4 1060.1 1060.4<br>1174.6 1197.3 1197.6 1335.8 1381.4<br>1512.7 1513.2 1637.7 1638.0 3155.8<br>3165.2 3165.7 3181.0 3181.6 3191.9                     | 5.7<br>5.7<br>2.9          |
| A1-TS   | 2               | -232.694656             | 0.097997                  | 0.760391 (0.75)       | -850.1 179.4 227.1 402.0 426.0<br>602.7 612.4 687.6 722.7 831.1<br>884.8 920.3 968.1 970.7 999.5<br>1016.7 1023.3 1049.0 1089.4 1178.6<br>1182.0 1319.6 1328.3 1468.4 1479.0<br>1585.7 1630.5 2376.1 3156.5 3162.2<br>3172.5 3176.3 3187.7 | 5.6<br>4.9<br>2.6          |
| A1-P    | 2               | -231.533449             | 0.087045                  | 0.750029 (0.75)       | 400.3 426.4 601.8 620.3 673.0<br>721.0 812.4 892.1 964.2 988.9<br>992.8 1017.2 1049.6 1073.3 1175.3<br>1176.0 1302.4 1324.3 1462.8 1470.8<br>1575.9 1629.9 3156.2 3162.1 3174.3<br>3176.9 3188.3                                           | 6.3<br>5.6<br>3.0          |
| A2      | 4               | -385.839809             | 0.146929                  | 0                     | 173.6 186.5 365.7 395.8 479.6<br>488.3 519.0 519.9 634.9 636.1<br>729.3 773.3 786.9 798.5 808.8<br>849.6 896.9 951.0 957.1 974.4<br>992.6 999.9 1035.6 1046.3 1151.1                                                                       | 3.1<br>1.2<br>0.9          |

|         |   |             |          |                    |        |        |        |        |        |     |
|---------|---|-------------|----------|--------------------|--------|--------|--------|--------|--------|-----|
|         |   |             |          |                    | 1169.2 | 1171.9 | 1185.2 | 1232.3 | 1270.0 |     |
|         |   |             |          |                    | 1287.1 | 1391.3 | 1398.7 | 1418.0 | 1490.6 |     |
|         |   |             |          |                    | 1491.7 | 1548.6 | 1614.0 | 1641.4 | 1671.2 |     |
|         |   |             |          |                    | 3156.1 | 3157.8 | 3160.2 | 3163.6 | 3174.2 |     |
|         |   |             |          |                    | 3175.5 | 3187.0 | 3188.2 |        |        |     |
| A2-TS-1 | 1 | -386.324243 | 0.144902 | 0.761759<br>(0.75) | -857.3 | 148.1  | 170.8  | 204.3  | 232.8  |     |
|         |   |             |          |                    | 375.5  | 400.6  | 467.8  | 506.5  | 508.8  | 2.9 |
|         |   |             |          |                    | 521.2  | 616.5  | 620.5  | 739.1  | 765.5  | 1.2 |
|         |   |             |          |                    | 775.1  | 796.3  | 802.9  | 865.0  | 899.1  | 0.9 |
|         |   |             |          |                    | 912.3  | 924.6  | 966.5  | 980.1  | 999.1  |     |
|         |   |             |          |                    | 1023.6 | 1040.0 | 1069.8 | 1138.0 | 1169.5 |     |
|         |   |             |          |                    | 1179.7 | 1205.6 | 1237.5 | 1273.4 | 1366.8 |     |
|         |   |             |          |                    | 1384.6 | 1391.1 | 1457.5 | 1485.2 | 1525.8 |     |
|         |   |             |          |                    | 1586.3 | 1637.4 | 1662.9 | 2360.4 | 3157.8 |     |
|         |   |             |          |                    | 3159.3 | 3168.1 | 3169.8 | 3181.3 | 3182.3 |     |
|         |   |             |          |                    | 3192.1 |        |        |        |        |     |
| A2-P-1  | 1 | -385.163358 | 0.133972 | 0.759055<br>(0.75) | 169.4  | 186.5  | 361.6  | 400.6  | 462.4  |     |
|         |   |             |          |                    | 507.3  | 508.4  | 521.6  | 611.0  | 631.4  | 3.3 |
|         |   |             |          |                    | 730.9  | 772.8  | 774.2  | 789.9  | 800.0  | 1.2 |
|         |   |             |          |                    | 865.5  | 893.0  | 932.4  | 964.6  | 976.2  | 0.9 |
|         |   |             |          |                    | 998.8  | 1033.1 | 1046.2 | 1138.7 | 1169.0 |     |
|         |   |             |          |                    | 1175.8 | 1197.7 | 1235.8 | 1270.3 | 1360.4 |     |
|         |   |             |          |                    | 1378.1 | 1389.5 | 1451.3 | 1483.5 | 1520.4 |     |
|         |   |             |          |                    | 1582.9 | 1637.4 | 1662.7 | 3158.1 | 3159.6 |     |
|         |   |             |          |                    | 3169.7 | 3170.8 | 3181.7 | 3182.7 | 3193.1 |     |
| A2-TS-2 | 1 | -386.324694 | 0.144765 | 0.760923<br>(0.75) | -846.8 | 142.6  | 179.8  | 219.1  | 221.8  |     |
|         |   |             |          |                    | 372.7  | 389.2  | 475.0  | 488.1  | 509.7  | 3.1 |
|         |   |             |          |                    | 516.2  | 616.0  | 631.1  | 746.4  | 766.9  | 1.2 |
|         |   |             |          |                    | 769.4  | 783.1  | 811.9  | 851.9  | 890.1  | 0.8 |
|         |   |             |          |                    | 910.0  | 931.8  | 960.6  | 972.5  | 997.8  |     |
|         |   |             |          |                    | 1021.2 | 1041.4 | 1053.3 | 1146.7 | 1163.0 |     |
|         |   |             |          |                    | 1174.6 | 1212.3 | 1254.9 | 1279.2 | 1353.3 |     |
|         |   |             |          |                    | 1387.4 | 1395.5 | 1462.9 | 1470.0 | 1533.9 |     |
|         |   |             |          |                    | 1598.8 | 1619.1 | 1658.7 | 2384.8 | 3155.8 |     |
|         |   |             |          |                    | 3158.3 | 3159.4 | 3164.5 | 3176.3 | 3177.5 |     |
|         |   |             |          |                    | 3188.6 |        |        |        |        |     |
| A2-P-2  | 1 | -385.163452 | 0.133803 | 0.757847<br>(0.75) | 174.6  | 192.0  | 368.9  | 387.0  | 471.8  |     |
|         |   |             |          |                    | 485.5  | 511.3  | 520.6  | 611.2  | 628.2  | 3.2 |
|         |   |             |          |                    | 744.9  | 755.0  | 767.4  | 794.0  | 805.9  | 1.3 |
|         |   |             |          |                    | 845.0  | 887.9  | 936.2  | 956.7  | 970.6  | 0.9 |
|         |   |             |          |                    | 996.6  | 1039.6 | 1049.2 | 1141.3 | 1161.1 |     |
|         |   |             |          |                    | 1172.1 | 1207.9 | 1249.9 | 1276.7 | 1335.1 |     |
|         |   |             |          |                    | 1385.9 | 1394.3 | 1457.1 | 1468.4 | 1529.9 |     |
|         |   |             |          |                    | 1592.5 | 1620.1 | 1656.7 | 3155.1 | 3158.9 |     |
|         |   |             |          |                    | 3160.1 | 3164.7 | 3176.5 | 3179.6 | 3188.7 |     |
| A3      | 4 | -539.464229 | 0.193332 | 0                  | 92.1   | 121.1  | 235.9  | 236.3  | 269.3  |     |
|         |   |             |          |                    | 387.9  | 396.1  | 398.1  | 480.3  | 485.4  | 2.2 |
|         |   |             |          |                    | 506.1  | 535.9  | 591.1  | 617.8  | 642.5  | 0.5 |
|         |   |             |          |                    | 661.6  | 741.9  | 759.2  | 763.5  | 770.3  | 0.4 |
|         |   |             |          |                    | 782.7  | 821.0  | 846.4  | 867.2  | 897.2  |     |
|         |   |             |          |                    | 913.2  | 918.8  | 929.4  | 968.6  | 973.4  |     |
|         |   |             |          |                    | 995.8  | 996.8  | 1026.9 | 1031.6 | 1127.4 |     |
|         |   |             |          |                    | 1158.7 | 1173.6 | 1189.1 | 1190.5 | 1210.5 |     |
|         |   |             |          |                    | 1289.9 | 1290.7 | 1294.5 | 1339.5 | 1375.9 |     |
|         |   |             |          |                    | 1414.8 | 1415.0 | 1427.9 | 1482.2 | 1487.6 |     |
|         |   |             |          |                    | 1517.2 | 1579.8 | 1594.1 | 1624.7 | 1668.4 |     |
|         |   |             |          |                    | 1670.7 | 3154.4 | 3156.5 | 3157.6 | 3158.5 |     |
|         |   |             |          |                    | 3162.7 | 3164.2 | 3175.3 | 3175.6 | 3187.0 |     |
|         |   |             |          |                    | 3187.5 |        |        |        |        |     |
| A3-TS-1 | 2 | -539.947828 | 0.191552 | 0.766132<br>(0.75) | -852.6 | 90.0   | 118.8  | 145.3  | 233.8  |     |
|         |   |             |          |                    | 234.3  | 264.2  | 267.2  | 390.7  | 395.8  | 2.0 |
|         |   |             |          |                    | 398.5  | 476.8  | 502.1  | 502.2  | 540.1  | 0.5 |
|         |   |             |          |                    | 581.0  | 615.0  | 624.7  | 656.3  | 746.1  | 0.4 |
|         |   |             |          |                    | 750.0  | 751.1  | 768.0  | 772.4  | 830.9  |     |
|         |   |             |          |                    | 851.5  | 866.7  | 897.3  | 900.4  | 910.6  |     |
|         |   |             |          |                    | 930.2  | 970.3  | 972.7  | 997.0  | 997.7  |     |
|         |   |             |          |                    | 1026.5 | 1030.1 | 1063.2 | 1126.7 | 1166.8 |     |
|         |   |             |          |                    | 1169.2 | 1189.7 | 1198.7 | 1240.1 | 1268.3 |     |
|         |   |             |          |                    | 1290.9 | 1323.5 | 1366.6 | 1374.8 | 1398.0 |     |
|         |   |             |          |                    | 1413.4 | 1475.6 | 1484.2 | 1510.3 | 1569.4 |     |
|         |   |             |          |                    | 1570.8 | 1620.4 | 1659.0 | 1667.4 | 2356.0 |     |
|         |   |             |          |                    | 3157.6 | 3159.5 | 3162.1 | 3170.4 | 3170.7 |     |
|         |   |             |          |                    | 3182.9 | 3183.1 | 3193.0 | 3193.4 |        |     |

|         |   |             |          |                    |                                                                                                                                    |                                                                                                                                  |                                                                                                                                   |                                                                                                                                   |                                                                                                                         |                   |
|---------|---|-------------|----------|--------------------|------------------------------------------------------------------------------------------------------------------------------------|----------------------------------------------------------------------------------------------------------------------------------|-----------------------------------------------------------------------------------------------------------------------------------|-----------------------------------------------------------------------------------------------------------------------------------|-------------------------------------------------------------------------------------------------------------------------|-------------------|
| A3-TS-2 | 1 | -539.948722 | 0.191281 | 0.763398<br>(0.75) | -857.0<br>234.7<br>404.3<br>577.7<br>754.8<br>854.5<br>915.1<br>1016.7<br>1177.5<br>1293.0<br>1425.0<br>1586.3<br>3154.9<br>3174.7 | 91.1<br>264.1<br>478.8<br>605.6<br>759.2<br>879.1<br>925.8<br>1029.1<br>1179.9<br>1328.2<br>1451.9<br>1622.2<br>3159.5<br>3177.7 | 109.5<br>270.0<br>489.4<br>634.6<br>772.9<br>895.4<br>972.3<br>1063.8<br>1194.7<br>1364.1<br>1481.9<br>1659.0<br>3159.9<br>3182.8 | 173.4<br>390.8<br>511.2<br>656.9<br>781.8<br>895.9<br>978.8<br>1110.6<br>1247.1<br>1386.0<br>1503.3<br>1669.8<br>3164.6<br>3189.5 | 209.6<br>395.6<br>530.8<br>735.3<br>820.5<br>910.6<br>997.6<br>1163.1<br>1287.8<br>1402.7<br>1550.5<br>2358.8<br>3168.6 | 2.0<br>0.4<br>0.4 |
| A3-TS-3 | 1 | -539.949148 | 0.191156 | 0.762207<br>(0.75) | -847.2<br>243.0<br>399.9<br>580.5<br>751.9<br>844.3<br>916.8<br>1014.2<br>1170.5<br>1290.5<br>1423.8<br>1589.3<br>3155.7<br>3164.8 | 87.7<br>253.9<br>472.5<br>609.7<br>761.8<br>863.8<br>924.0<br>1029.2<br>1188.4<br>1310.3<br>1455.6<br>1608.2<br>3157.6<br>3176.9 | 117.6<br>279.3<br>482.0<br>640.1<br>775.8<br>882.1<br>968.6<br>1049.2<br>1204.2<br>1370.2<br>1472.1<br>1645.3<br>3158.4<br>3179.3 | 174.9<br>381.8<br>506.1<br>654.3<br>792.9<br>896.0<br>972.9<br>1129.3<br>1270.5<br>1372.8<br>1505.9<br>1669.1<br>3160.1<br>3188.9 | 204.1<br>394.8<br>530.6<br>736.2<br>819.9<br>908.3<br>997.3<br>1157.8<br>1286.0<br>1412.5<br>1571.5<br>2383.9<br>3160.8 | 2.1<br>0.4<br>0.4 |
| A3-P-1  | 2 | -538.787320 | 0.180630 | 0.765395<br>(0.75) | 89.7<br>383.2<br>504.6<br>657.7<br>772.8<br>905.9<br>997.6<br>1166.6<br>1291.9<br>1412.5<br>1571.3<br>3158.7<br>3182.3             | 118.4<br>391.3<br>536.7<br>743.5<br>829.2<br>932.0<br>1024.9<br>1188.4<br>1323.4<br>1473.7<br>1620.7<br>3163.0<br>3192.7         | 231.9<br>397.9<br>580.8<br>749.1<br>851.9<br>970.3<br>1028.4<br>1196.4<br>1361.8<br>1483.7<br>1658.5<br>3169.8<br>3193.2          | 232.9<br>472.6<br>613.6<br>759.2<br>865.8<br>972.4<br>1124.7<br>1233.8<br>1371.5<br>1508.9<br>1665.6<br>3170.2                    | 263.4<br>501.2<br>637.3<br>767.3<br>896.6<br>997.2<br>1165.6<br>1267.8<br>1390.2<br>1564.0<br>3157.6<br>3182.1          | 2.2<br>0.4<br>0.4 |
| A3-P-2  | 1 | -538.787867 | 0.180341 | 0.761482<br>(0.75) | 90.5<br>390.5<br>511.6<br>655.1<br>779.6<br>901.2<br>997.5<br>1173.5<br>1291.1<br>1424.2<br>1586.0<br>3158.9<br>3177.4             | 122.5<br>394.9<br>525.9<br>724.3<br>822.1<br>910.9<br>1023.9<br>1177.4<br>1324.3<br>1447.0<br>1622.0<br>3159.5<br>3182.2         | 233.2<br>400.4<br>573.7<br>754.9<br>854.6<br>925.2<br>1031.3<br>1193.3<br>1360.2<br>1481.4<br>1659.8<br>3164.5<br>3189.0          | 235.3<br>474.9<br>617.0<br>762.2<br>871.4<br>971.2<br>1112.8<br>1242.0<br>1380.0<br>1501.3<br>1669.6<br>3169.4                    | 265.8<br>486.2<br>638.3<br>769.2<br>900.5<br>974.5<br>1162.1<br>1285.9<br>1399.1<br>1547.1<br>3154.4<br>3175.2          | 2.2<br>0.5<br>0.4 |
| A3-P-3  | 1 | -538.787928 | 0.180190 | 0.759734<br>(0.75) | 93.4<br>379.5<br>505.4<br>658.0<br>788.1<br>901.1<br>997.1<br>1166.6<br>1288.1<br>1422.3<br>1588.0<br>3157.1<br>3176.0             | 122.3<br>396.2<br>533.6<br>724.4<br>819.7<br>910.4<br>1029.2<br>1187.9<br>1304.1<br>1450.7<br>1610.5<br>3158.0<br>3180.0         | 237.5<br>398.8<br>578.3<br>751.2<br>834.4<br>924.6<br>1038.3<br>1202.0<br>1364.3<br>1471.0<br>1642.2<br>3159.4<br>3187.8          | 238.1<br>464.7<br>608.5<br>760.1<br>860.5<br>965.0<br>1124.6<br>1261.9<br>1369.8<br>1504.7<br>1668.9<br>3160.6                    | 273.4<br>481.6<br>639.0<br>774.2<br>894.1<br>972.2<br>1156.3<br>1284.2<br>1410.6<br>1565.1<br>3154.8<br>3164.4          | 2.2<br>0.5<br>0.4 |
| A3-p    | 2 | -539.471930 | 0.193652 | 0                  | 95.1<br>399.9<br>507.7<br>723.5<br>801.8<br>888.6                                                                                  | 100.2<br>411.5<br>542.3<br>725.8<br>827.4<br>947.6                                                                               | 229.4<br>436.9<br>557.4<br>727.2<br>843.4<br>961.1                                                                                | 242.4<br>446.9<br>599.5<br>747.7<br>876.8<br>977.0                                                                                | 248.5<br>506.2<br>632.9<br>765.8<br>881.1<br>992.5                                                                      | 1.6<br>0.6<br>0.4 |

|           |   |             |          |                    |                                                                                                                                    |                                                                                                                                  |                                                                                                                                  |                                                                                                                                   |                                                                                                                          |                   |
|-----------|---|-------------|----------|--------------------|------------------------------------------------------------------------------------------------------------------------------------|----------------------------------------------------------------------------------------------------------------------------------|----------------------------------------------------------------------------------------------------------------------------------|-----------------------------------------------------------------------------------------------------------------------------------|--------------------------------------------------------------------------------------------------------------------------|-------------------|
|           |   |             |          |                    | 993.0<br>1165.7<br>1242.5<br>1375.0<br>1535.8<br>1661.2<br>3169.9<br>3206.0                                                        | 1017.3<br>1173.4<br>1266.5<br>1445.2<br>1563.3<br>3155.4<br>3175.5                                                               | 1061.2<br>1186.4<br>1304.7<br>1450.9<br>1609.0<br>3159.2<br>3183.4                                                               | 1062.4<br>1189.2<br>1325.4<br>1472.1<br>1644.5<br>3160.0<br>3186.0                                                                | 1115.4<br>1225.0<br>1368.5<br>1490.9<br>1656.5<br>3168.9<br>3193.9                                                       |                   |
| A3-p-TS-1 | 1 | -539.956368 | 0.191638 | 0.761646<br>(0.75) | -859.8<br>239.2<br>436.7<br>548.1<br>732.5<br>848.2<br>950.2<br>1050.2<br>1178.0<br>1292.8<br>1445.8<br>1596.5<br>3155.6<br>3185.2 | 93.8<br>247.5<br>446.5<br>587.9<br>752.4<br>870.9<br>962.0<br>1061.1<br>1189.4<br>1305.6<br>1472.9<br>1638.8<br>3161.7<br>3190.9 | 98.0<br>258.1<br>509.3<br>631.3<br>760.5<br>870.9<br>991.4<br>1062.5<br>1198.2<br>1349.1<br>1482.0<br>1646.8<br>3167.0<br>3195.1 | 150.9<br>395.4<br>516.0<br>707.8<br>795.0<br>883.7<br>994.8<br>1117.2<br>1219.6<br>1364.4<br>1517.7<br>1652.5<br>3171.1<br>3205.8 | 236.8<br>407.9<br>532.8<br>722.8<br>833.0<br>912.0<br>1015.5<br>1161.0<br>1263.0<br>1385.4<br>1563.0<br>2355.6<br>3178.6 | 1.5<br>0.5<br>0.4 |
| A3-p-TS-2 | 1 | -539.956221 | 0.191675 | 0.761348<br>(0.75) | -855.6<br>228.5<br>446.1<br>550.7<br>723.1<br>837.0<br>954.2<br>1034.4<br>1182.3<br>1286.7<br>1430.6<br>1589.9<br>3159.9<br>3185.2 | 89.1<br>240.2<br>448.1<br>587.6<br>756.4<br>879.0<br>970.3<br>1060.7<br>1187.3<br>1321.0<br>1458.9<br>1637.2<br>3162.1<br>3189.3 | 97.7<br>266.6<br>502.4<br>624.0<br>758.5<br>884.3<br>982.5<br>1078.3<br>1214.2<br>1354.1<br>1482.5<br>1652.4<br>3164.5<br>3194.1 | 173.4<br>405.2<br>503.4<br>712.1<br>806.8<br>889.4<br>994.4<br>1103.8<br>1224.7<br>1369.5<br>1514.1<br>1655.9<br>3170.3<br>3207.5 | 224.3<br>414.7<br>550.4<br>712.2<br>829.6<br>910.2<br>996.9<br>1165.7<br>1246.3<br>1414.9<br>1547.4<br>2364.1<br>3176.6  | 1.6<br>0.5<br>0.4 |
| A3-p-TS-3 | 1 | -539.956537 | 0.191476 | 0.760675<br>(0.75) | -840.7<br>228.0<br>431.5<br>555.2<br>726.4<br>823.5<br>945.2<br>1023.0<br>1177.1<br>1294.6<br>1444.7<br>1594.9<br>3157.1<br>3177.2 | 91.4<br>261.3<br>448.9<br>589.9<br>754.2<br>871.8<br>960.4<br>1059.0<br>1183.8<br>1314.1<br>1457.5<br>1622.5<br>3160.0<br>3185.4 | 93.9<br>261.8<br>503.6<br>621.5<br>769.2<br>880.6<br>979.7<br>1064.5<br>1206.2<br>1356.7<br>1477.6<br>1649.5<br>3161.4<br>3191.6 | 170.6<br>393.3<br>504.7<br>712.9<br>811.9<br>884.0<br>993.7<br>1119.0<br>1237.5<br>1371.8<br>1524.6<br>1659.6<br>3169.4<br>3204.9 | 205.5<br>409.8<br>538.8<br>713.7<br>820.3<br>903.7<br>1008.4<br>1161.7<br>1260.8<br>1398.7<br>1541.6<br>2399.7<br>3171.3 | 1.6<br>0.5<br>0.4 |
| A3-p-TS-4 | 1 | -539.956842 | 0.191458 | 0.760845<br>(0.75) | -848.1<br>238.2<br>431.0<br>551.9<br>721.9<br>839.6<br>955.0<br>1029.1<br>1174.7<br>1285.0<br>1441.3<br>1600.0<br>3155.5<br>3179.2 | 89.7<br>249.8<br>449.3<br>585.0<br>752.0<br>865.4<br>959.5<br>1060.6<br>1186.5<br>1313.6<br>1456.4<br>1614.4<br>3158.7<br>3180.7 | 99.1<br>265.2<br>501.0<br>628.4<br>786.0<br>878.9<br>980.4<br>1071.0<br>1215.6<br>1357.2<br>1473.6<br>1651.2<br>3161.2<br>3187.4 | 171.9<br>396.9<br>501.2<br>712.4<br>791.2<br>886.2<br>993.9<br>1114.7<br>1240.4<br>1365.2<br>1515.1<br>1659.4<br>3171.0<br>3202.3 | 203.5<br>410.4<br>547.9<br>719.0<br>818.8<br>900.0<br>997.1<br>1159.1<br>1253.1<br>1417.2<br>1552.3<br>2383.0<br>3177.2  | 1.6<br>0.5<br>0.4 |
| A3-p-TS-5 | 1 | -539.955838 | 0.191814 | 0.761077<br>(0.75) | -950.8<br>239.9<br>447.3<br>559.3<br>724.2<br>834.7<br>961.4<br>1055.8<br>1174.0                                                   | 71.9<br>253.7<br>453.5<br>590.4<br>750.1<br>881.8<br>972.7<br>1059.5<br>1185.2                                                   | 99.1<br>370.5<br>499.1<br>620.6<br>775.7<br>882.3<br>983.4<br>1093.6<br>1199.9                                                   | 173.2<br>405.1<br>504.3<br>712.9<br>801.4<br>893.7<br>996.1<br>1123.3<br>1231.2                                                   | 227.3<br>409.1<br>555.5<br>713.6<br>830.8<br>911.0<br>1012.6<br>1166.6<br>1244.1                                         | 1.5<br>0.5<br>0.4 |

|          |   |             |          |                    |        |        |        |        |        |     |
|----------|---|-------------|----------|--------------------|--------|--------|--------|--------|--------|-----|
|          |   |             |          |                    | 1287.0 | 1318.0 | 1355.1 | 1365.7 | 1425.2 |     |
|          |   |             |          |                    | 1432.8 | 1455.3 | 1479.0 | 1524.6 | 1538.5 |     |
|          |   |             |          |                    | 1588.0 | 1638.2 | 1652.2 | 1657.7 | 2242.4 |     |
|          |   |             |          |                    | 3156.4 | 3160.2 | 3161.0 | 3169.1 | 3171.9 |     |
|          |   |             |          |                    | 3176.2 | 3183.8 | 3187.2 | 3220.4 |        |     |
| A3-p-P-1 | 1 | -538.795584 | 0.180707 | 0.758892<br>(0.75) | 95.5   | 99.0   | 230.6  | 243.5  | 245.8  |     |
|          |   |             |          |                    | 393.9  | 403.6  | 435.8  | 446.0  | 499.7  |     |
|          |   |             |          |                    | 512.2  | 532.7  | 553.8  | 586.7  | 630.8  |     |
|          |   |             |          |                    | 717.9  | 722.3  | 730.0  | 746.9  | 761.8  |     |
|          |   |             |          |                    | 794.4  | 837.1  | 838.1  | 873.6  | 875.7  |     |
|          |   |             |          |                    | 880.8  | 949.9  | 962.1  | 990.5  | 995.5  | 1.7 |
|          |   |             |          |                    | 1014.8 | 1058.7 | 1062.2 | 1113.8 | 1160.2 | 0.6 |
|          |   |             |          |                    | 1175.2 | 1187.5 | 1191.4 | 1218.0 | 1261.2 | 0.4 |
|          |   |             |          |                    | 1292.2 | 1300.0 | 1344.8 | 1359.4 | 1375.6 |     |
|          |   |             |          |                    | 1444.6 | 1473.1 | 1481.4 | 1513.4 | 1563.3 |     |
|          |   |             |          |                    | 1594.1 | 1640.0 | 1645.5 | 1654.0 | 3157.0 |     |
|          |   |             |          |                    | 3161.7 | 3166.5 | 3171.6 | 3178.1 | 3185.1 |     |
|          |   |             |          |                    | 3190.4 | 3195.0 | 3205.5 |        |        |     |
| A3-p-P-2 | 1 | -538.795397 | 0.180752 | 0.758461<br>(0.75) | 94.9   | 101.1  | 225.6  | 239.2  | 245.6  |     |
|          |   |             |          |                    | 404.4  | 413.5  | 447.0  | 447.4  | 498.2  |     |
|          |   |             |          |                    | 499.6  | 551.7  | 553.3  | 584.2  | 631.3  |     |
|          |   |             |          |                    | 707.4  | 720.4  | 723.8  | 748.5  | 758.1  |     |
|          |   |             |          |                    | 805.1  | 831.2  | 835.6  | 878.6  | 882.7  |     |
|          |   |             |          |                    | 883.8  | 952.6  | 966.9  | 983.5  | 994.3  | 1.6 |
|          |   |             |          |                    | 1006.3 | 1059.9 | 1061.4 | 1104.0 | 1165.5 | 0.6 |
|          |   |             |          |                    | 1179.4 | 1186.3 | 1206.5 | 1223.3 | 1243.9 | 0.4 |
|          |   |             |          |                    | 1285.0 | 1320.3 | 1348.3 | 1368.6 | 1409.7 |     |
|          |   |             |          |                    | 1428.6 | 1457.4 | 1481.3 | 1508.2 | 1544.4 |     |
|          |   |             |          |                    | 1587.7 | 1637.2 | 1652.7 | 1655.0 | 3159.9 |     |
|          |   |             |          |                    | 3160.7 | 3164.4 | 3170.9 | 3177.3 | 3185.6 |     |
|          |   |             |          |                    | 3189.6 | 3194.6 | 3207.6 |        |        |     |
| A3-p-P-3 | 1 | -538.795186 | 0.180545 | 0.757478<br>(0.75) | 93.2   | 103.4  | 227.3  | 250.1  | 251.8  |     |
|          |   |             |          |                    | 391.2  | 413.8  | 430.3  | 447.4  | 502.0  |     |
|          |   |             |          |                    | 503.2  | 535.1  | 552.1  | 588.5  | 626.6  |     |
|          |   |             |          |                    | 709.1  | 716.7  | 725.7  | 751.3  | 762.8  |     |
|          |   |             |          |                    | 806.1  | 816.5  | 831.0  | 869.5  | 880.1  |     |
|          |   |             |          |                    | 885.0  | 942.1  | 959.0  | 979.4  | 993.2  | 1.6 |
|          |   |             |          |                    | 1009.2 | 1059.7 | 1066.1 | 1116.1 | 1156.9 | 0.6 |
|          |   |             |          |                    | 1175.6 | 1181.9 | 1203.8 | 1236.8 | 1258.4 | 0.4 |
|          |   |             |          |                    | 1290.0 | 1308.8 | 1348.1 | 1371.1 | 1394.2 |     |
|          |   |             |          |                    | 1442.6 | 1456.6 | 1474.4 | 1522.7 | 1536.5 |     |
|          |   |             |          |                    | 1591.0 | 1620.8 | 1648.9 | 1659.4 | 3156.9 |     |
|          |   |             |          |                    | 3160.3 | 3161.5 | 3169.6 | 3172.0 | 3177.0 |     |
|          |   |             |          |                    | 3185.1 | 3191.1 | 3204.1 |        |        |     |
| A3-p-P-4 | 1 | -538.795603 | 0.180541 | 0.757735<br>(0.75) | 97.8   | 100.0  | 235.4  | 240.1  | 250.7  |     |
|          |   |             |          |                    | 396.0  | 409.5  | 429.3  | 448.5  | 499.0  |     |
|          |   |             |          |                    | 507.3  | 546.4  | 557.4  | 581.8  | 623.0  |     |
|          |   |             |          |                    | 706.7  | 718.3  | 723.2  | 750.6  | 778.7  |     |
|          |   |             |          |                    | 788.6  | 827.0  | 836.9  | 858.6  | 880.0  |     |
|          |   |             |          |                    | 885.9  | 952.7  | 957.4  | 979.0  | 993.8  | 1.7 |
|          |   |             |          |                    | 1006.6 | 1059.1 | 1069.0 | 1110.9 | 1154.9 | 0.6 |
|          |   |             |          |                    | 1174.1 | 1185.9 | 1212.9 | 1239.4 | 1250.5 | 0.4 |
|          |   |             |          |                    | 1275.1 | 1312.5 | 1345.8 | 1364.8 | 1413.7 |     |
|          |   |             |          |                    | 1438.1 | 1455.8 | 1471.1 | 1509.2 | 1551.6 |     |
|          |   |             |          |                    | 1595.1 | 1613.8 | 1651.0 | 1658.5 | 3154.2 |     |
|          |   |             |          |                    | 3158.2 | 3160.8 | 3169.9 | 3177.1 | 3180.6 |     |
|          |   |             |          |                    | 3182.1 | 3187.5 | 3199.7 |        |        |     |
| A3-p-P-5 | 1 | -538.798446 | 0.180606 | 0.758241<br>(0.75) | 99.7   | 116.1  | 222.1  | 225.8  | 247.9  |     |
|          |   |             |          |                    | 406.9  | 410.2  | 447.6  | 451.2  | 494.8  |     |
|          |   |             |          |                    | 500.2  | 555.4  | 556.0  | 588.2  | 629.1  |     |
|          |   |             |          |                    | 706.8  | 720.9  | 725.3  | 743.1  | 770.2  |     |
|          |   |             |          |                    | 802.6  | 828.1  | 835.7  | 884.4  | 889.1  |     |
|          |   |             |          |                    | 889.3  | 963.1  | 968.3  | 981.4  | 996.6  | 1.7 |
|          |   |             |          |                    | 1012.9 | 1050.5 | 1065.4 | 1099.6 | 1162.4 | 0.6 |
|          |   |             |          |                    | 1172.1 | 1179.7 | 1190.0 | 1230.4 | 1242.7 | 0.4 |
|          |   |             |          |                    | 1281.7 | 1314.2 | 1355.5 | 1367.4 | 1424.1 |     |
|          |   |             |          |                    | 1431.6 | 1450.0 | 1476.4 | 1515.7 | 1533.4 |     |
|          |   |             |          |                    | 1585.8 | 1637.4 | 1650.5 | 1655.7 | 3155.6 |     |
|          |   |             |          |                    | 3159.1 | 3159.8 | 3167.2 | 3170.0 | 3174.9 |     |
|          |   |             |          |                    | 3178.2 | 3182.5 | 3189.3 |        |        |     |
| A4       | 4 | -693.086295 | 0.239594 | 0                  | 56.7   | 89.8   | 150.3  | 163.3  | 191.7  | 1.6 |
|          |   |             |          |                    | 271.7  | 305.1  | 317.8  | 318.2  | 383.2  | 0.2 |
|          |   |             |          |                    | 448.2  | 474.4  | 478.4  | 483.8  | 505.6  | 0.2 |

|         |   |             |          |                    |        |        |        |        |        |     |
|---------|---|-------------|----------|--------------------|--------|--------|--------|--------|--------|-----|
|         |   |             |          |                    | 518.9  | 562.7  | 567.2  | 618.6  | 634.8  |     |
|         |   |             |          |                    | 645.1  | 734.0  | 745.7  | 757.3  | 758.3  |     |
|         |   |             |          |                    | 762.9  | 769.4  | 778.2  | 788.4  | 844.3  |     |
|         |   |             |          |                    | 854.7  | 864.9  | 867.8  | 892.1  | 910.6  |     |
|         |   |             |          |                    | 916.3  | 917.1  | 945.3  | 972.2  | 973.6  |     |
|         |   |             |          |                    | 995.8  | 996.4  | 1020.7 | 1023.3 | 1146.9 |     |
|         |   |             |          |                    | 1150.3 | 1152.0 | 1186.5 | 1189.6 | 1204.1 |     |
|         |   |             |          |                    | 1223.2 | 1224.1 | 1291.0 | 1298.8 | 1315.6 |     |
|         |   |             |          |                    | 1318.1 | 1359.9 | 1367.8 | 1411.9 | 1418.1 |     |
|         |   |             |          |                    | 1424.3 | 1432.4 | 1479.6 | 1482.1 | 1501.6 |     |
|         |   |             |          |                    | 1557.5 | 1578.3 | 1583.8 | 1609.0 | 1648.6 |     |
|         |   |             |          |                    | 1663.2 | 1677.4 | 3154.6 | 3156.4 | 3156.7 |     |
|         |   |             |          |                    | 3158.3 | 3159.7 | 3159.8 | 3163.4 | 3164.5 |     |
|         |   |             |          |                    | 3175.4 | 3176.4 | 3186.4 | 3188.4 |        |     |
| A4-TS-1 | 1 | -693.569969 | 0.237771 | 0.775722<br>(0.75) | -853.3 | 55.8   | 87.2   | 139.4  | 151.3  |     |
|         |   |             |          |                    | 162.0  | 192.6  | 262.7  | 270.3  | 305.9  |     |
|         |   |             |          |                    | 313.8  | 318.9  | 385.1  | 450.7  | 472.0  |     |
|         |   |             |          |                    | 475.6  | 502.8  | 505.1  | 515.3  | 560.4  |     |
|         |   |             |          |                    | 562.4  | 616.3  | 627.3  | 636.9  | 723.4  |     |
|         |   |             |          |                    | 745.3  | 747.1  | 756.9  | 759.2  | 763.6  |     |
|         |   |             |          |                    | 772.7  | 780.8  | 845.1  | 855.0  | 873.4  |     |
|         |   |             |          |                    | 876.8  | 897.9  | 901.1  | 908.8  | 913.9  |     |
|         |   |             |          |                    | 943.4  | 972.7  | 973.9  | 996.6  | 997.0  | 1.6 |
|         |   |             |          |                    | 1020.7 | 1022.6 | 1062.6 | 1145.6 | 1149.3 | 0.2 |
|         |   |             |          |                    | 1163.4 | 1185.8 | 1191.5 | 1209.7 | 1220.8 | 0.2 |
|         |   |             |          |                    | 1246.9 | 1275.3 | 1301.1 | 1316.1 | 1355.7 |     |
|         |   |             |          |                    | 1359.3 | 1381.3 | 1391.6 | 1416.6 | 1426.7 |     |
|         |   |             |          |                    | 1473.7 | 1479.2 | 1498.0 | 1535.0 | 1563.4 |     |
|         |   |             |          |                    | 1579.7 | 1605.7 | 1637.0 | 1660.8 | 1674.4 |     |
|         |   |             |          |                    | 2354.0 | 3155.5 | 3158.8 | 3159.9 | 3162.6 |     |
|         |   |             |          |                    | 3164.8 | 3170.6 | 3176.3 | 3178.1 | 3183.2 |     |
|         |   |             |          |                    | 3189.4 | 3193.4 |        |        |        |     |
| A4-TS-2 | 1 | -693.570864 | 0.237519 | 0.766127<br>(0.75) | -858.1 | 56.2   | 83.6   | 148.9  | 157.9  |     |
|         |   |             |          |                    | 158.5  | 202.4  | 234.5  | 271.1  | 311.4  |     |
|         |   |             |          |                    | 316.3  | 324.3  | 385.3  | 449.8  | 474.6  |     |
|         |   |             |          |                    | 479.0  | 495.1  | 500.6  | 513.2  | 556.7  |     |
|         |   |             |          |                    | 560.4  | 612.9  | 622.3  | 642.0  | 722.1  |     |
|         |   |             |          |                    | 748.8  | 753.7  | 754.4  | 761.4  | 772.8  |     |
|         |   |             |          |                    | 776.9  | 786.9  | 848.9  | 862.8  | 868.0  |     |
|         |   |             |          |                    | 872.4  | 891.9  | 892.3  | 908.8  | 915.8  |     |
|         |   |             |          |                    | 921.6  | 935.0  | 973.7  | 978.5  | 996.9  |     |
|         |   |             |          |                    | 1011.7 | 1021.9 | 1062.1 | 1131.2 | 1151.1 | 1.6 |
|         |   |             |          |                    | 1154.5 | 1180.6 | 1188.4 | 1210.1 | 1222.0 | 0.2 |
|         |   |             |          |                    | 1271.9 | 1298.3 | 1305.0 | 1314.0 | 1340.9 | 0.2 |
|         |   |             |          |                    | 1360.4 | 1393.3 | 1407.4 | 1412.5 | 1429.4 |     |
|         |   |             |          |                    | 1451.6 | 1479.0 | 1492.1 | 1540.5 | 1558.2 |     |
|         |   |             |          |                    | 1581.0 | 1606.7 | 1646.3 | 1657.2 | 1674.0 |     |
|         |   |             |          |                    | 2354.9 | 3155.2 | 3157.8 | 3159.2 | 3160.2 |     |
|         |   |             |          |                    | 3160.4 | 3164.8 | 3168.1 | 3176.1 | 3177.2 |     |
|         |   |             |          |                    | 3182.7 | 3189.0 |        |        |        |     |
| A4-P-1  | 1 | -692.409487 | 0.226848 | 0.779153<br>(0.75) | 55.6   | 88.1   | 148.4  | 161.5  | 188.1  |     |
|         |   |             |          |                    | 269.5  | 299.9  | 311.9  | 317.8  | 385.4  |     |
|         |   |             |          |                    | 441.2  | 467.6  | 474.7  | 503.7  | 505.9  |     |
|         |   |             |          |                    | 514.4  | 560.4  | 562.4  | 617.4  | 631.7  |     |
|         |   |             |          |                    | 640.7  | 720.8  | 744.9  | 754.3  | 756.5  |     |
|         |   |             |          |                    | 759.4  | 763.7  | 772.8  | 782.1  | 844.0  |     |
|         |   |             |          |                    | 854.2  | 873.3  | 874.5  | 902.5  | 904.0  |     |
|         |   |             |          |                    | 909.9  | 944.2  | 972.5  | 973.7  | 996.5  |     |
|         |   |             |          |                    | 997.1  | 1018.5 | 1023.4 | 1144.7 | 1148.4 | 1.7 |
|         |   |             |          |                    | 1161.0 | 1184.2 | 1190.4 | 1207.8 | 1219.4 | 0.2 |
|         |   |             |          |                    | 1241.7 | 1274.3 | 1299.4 | 1316.0 | 1354.3 | 0.2 |
|         |   |             |          |                    | 1359.6 | 1372.5 | 1385.8 | 1416.0 | 1425.0 |     |
|         |   |             |          |                    | 1472.2 | 1479.1 | 1497.3 | 1530.1 | 1561.8 |     |
|         |   |             |          |                    | 1579.7 | 1605.9 | 1637.0 | 1659.8 | 1673.3 |     |
|         |   |             |          |                    | 3155.0 | 3158.4 | 3158.9 | 3163.9 | 3164.7 |     |
|         |   |             |          |                    | 3170.6 | 3175.8 | 3177.5 | 3182.8 | 3187.7 |     |
|         |   |             |          |                    | 3193.6 |        |        |        |        |     |
| A4-P-2  | 1 | -692.410042 | 0.226569 | 0.765545<br>(0.75) | 55.9   | 90.9   | 148.5  | 163.3  | 190.6  |     |
|         |   |             |          |                    | 269.8  | 304.8  | 313.2  | 319.2  | 385.0  |     |
|         |   |             |          |                    | 447.1  | 472.2  | 478.0  | 492.8  | 498.2  | 1.7 |
|         |   |             |          |                    | 510.6  | 554.0  | 563.2  | 611.0  | 632.3  | 0.2 |
|         |   |             |          |                    | 642.4  | 713.8  | 745.0  | 752.9  | 757.9  | 0.2 |
|         |   |             |          |                    | 761.5  | 769.2  | 776.4  | 786.5  | 848.8  |     |



|            |   |             |          |                    |        |        |        |        |        |     |
|------------|---|-------------|----------|--------------------|--------|--------|--------|--------|--------|-----|
|            |   |             |          |                    | 858.1  | 867.7  | 871.7  | 889.2  | 896.9  |     |
|            |   |             |          |                    | 915.5  | 919.3  | 936.5  | 972.8  | 973.9  |     |
|            |   |             |          |                    | 996.8  | 1016.7 | 1022.4 | 1132.5 | 1150.9 |     |
|            |   |             |          |                    | 1153.3 | 1173.6 | 1188.1 | 1209.1 | 1221.1 |     |
|            |   |             |          |                    | 1267.9 | 1296.7 | 1302.8 | 1312.3 | 1334.5 |     |
|            |   |             |          |                    | 1358.6 | 1388.5 | 1403.3 | 1410.7 | 1429.1 |     |
|            |   |             |          |                    | 1447.5 | 1478.3 | 1491.0 | 1537.3 | 1557.5 |     |
|            |   |             |          |                    | 1580.8 | 1606.6 | 1645.8 | 1658.0 | 1674.2 |     |
|            |   |             |          |                    | 3154.7 | 3157.6 | 3159.0 | 3160.0 | 3160.2 |     |
|            |   |             |          |                    | 3164.7 | 3169.5 | 3176.5 | 3177.1 | 3182.4 |     |
|            |   |             |          |                    | 3189.0 |        |        |        |        |     |
| A4-py      | 4 | -615.706615 | 0.206405 | 0                  | 98.4   | 152.3  | 214.0  | 249.3  | 262.6  |     |
|            |   |             |          |                    | 359.4  | 402.1  | 412.1  | 462.6  | 500.4  |     |
|            |   |             |          |                    | 507.1  | 508.7  | 513.6  | 538.5  | 554.3  |     |
|            |   |             |          |                    | 586.0  | 595.4  | 687.8  | 704.1  | 726.2  |     |
|            |   |             |          |                    | 749.6  | 756.9  | 783.5  | 814.7  | 814.9  |     |
|            |   |             |          |                    | 834.5  | 846.6  | 859.3  | 902.4  | 916.3  |     |
|            |   |             |          |                    | 973.6  | 979.9  | 980.8  | 982.0  | 991.0  | 1.0 |
|            |   |             |          |                    | 1014.9 | 1091.3 | 1114.0 | 1127.1 | 1165.4 | 0.6 |
|            |   |             |          |                    | 1168.1 | 1198.3 | 1204.4 | 1232.1 | 1262.7 | 0.4 |
|            |   |             |          |                    | 1264.2 | 1268.3 | 1342.7 | 1351.6 | 1400.0 |     |
|            |   |             |          |                    | 1427.5 | 1434.3 | 1457.8 | 1459.5 | 1483.3 |     |
|            |   |             |          |                    | 1515.6 | 1535.7 | 1596.4 | 1626.1 | 1635.8 |     |
|            |   |             |          |                    | 1646.0 | 1670.8 | 3155.9 | 3156.2 | 3159.4 |     |
|            |   |             |          |                    | 3160.1 | 3167.2 | 3168.1 | 3175.3 | 3175.4 |     |
|            |   |             |          |                    | 3184.3 | 3184.8 |        |        |        |     |
| A4-py-TS-1 | 2 | -616.191567 | 0.204209 | 0.760424<br>(0.75) | -850.0 | 91.9   | 150.3  | 168.8  | 216.2  |     |
|            |   |             |          |                    | 218.3  | 245.6  | 282.6  | 366.2  | 395.2  |     |
|            |   |             |          |                    | 408.2  | 462.9  | 496.7  | 506.4  | 507.3  |     |
|            |   |             |          |                    | 516.2  | 530.6  | 553.6  | 569.9  | 594.6  |     |
|            |   |             |          |                    | 679.1  | 681.8  | 718.0  | 753.4  | 766.0  |     |
|            |   |             |          |                    | 789.9  | 806.8  | 807.2  | 831.6  | 844.2  |     |
|            |   |             |          |                    | 864.8  | 878.5  | 908.8  | 913.3  | 977.1  | 1.0 |
|            |   |             |          |                    | 980.6  | 981.9  | 989.7  | 1008.7 | 1041.7 | 0.5 |
|            |   |             |          |                    | 1083.2 | 1105.5 | 1132.0 | 1165.9 | 1169.5 | 0.4 |
|            |   |             |          |                    | 1202.5 | 1214.1 | 1250.5 | 1255.9 | 1266.7 |     |
|            |   |             |          |                    | 1331.8 | 1346.0 | 1377.9 | 1413.8 | 1417.8 |     |
|            |   |             |          |                    | 1445.3 | 1450.3 | 1477.3 | 1500.6 | 1528.3 |     |
|            |   |             |          |                    | 1556.1 | 1620.6 | 1621.3 | 1645.8 | 1666.4 |     |
|            |   |             |          |                    | 2378.9 | 3157.5 | 3157.6 | 3160.8 | 3162.6 |     |
|            |   |             |          |                    | 3163.5 | 3168.4 | 3176.6 | 3176.8 | 3185.3 |     |
| A4-py-TS-2 | 1 | -616.190568 | 0.204434 | 0.762727<br>(0.75) | -843.6 | 95.6   | 134.6  | 175.8  | 214.4  |     |
|            |   |             |          |                    | 230.8  | 255.5  | 264.8  | 368.1  | 405.7  |     |
|            |   |             |          |                    | 410.8  | 460.3  | 488.7  | 504.8  | 509.9  |     |
|            |   |             |          |                    | 514.4  | 539.6  | 547.2  | 573.8  | 596.3  |     |
|            |   |             |          |                    | 685.6  | 701.3  | 715.9  | 740.1  | 765.6  |     |
|            |   |             |          |                    | 788.6  | 799.0  | 820.2  | 831.7  | 839.4  |     |
|            |   |             |          |                    | 857.3  | 893.1  | 911.5  | 947.7  | 969.1  | 1.0 |
|            |   |             |          |                    | 978.1  | 981.6  | 990.5  | 999.3  | 1034.3 | 0.5 |
|            |   |             |          |                    | 1095.8 | 1121.2 | 1137.9 | 1165.5 | 1178.4 | 0.4 |
|            |   |             |          |                    | 1199.5 | 1209.4 | 1241.2 | 1260.1 | 1267.1 |     |
|            |   |             |          |                    | 1330.5 | 1336.2 | 1391.2 | 1400.7 | 1425.2 |     |
|            |   |             |          |                    | 1440.7 | 1451.7 | 1474.9 | 1490.3 | 1526.4 |     |
|            |   |             |          |                    | 1586.1 | 1607.6 | 1628.9 | 1641.4 | 1666.2 |     |
|            |   |             |          |                    | 2390.1 | 3156.9 | 3158.9 | 3160.1 | 3163.8 |     |
|            |   |             |          |                    | 3168.6 | 3173.9 | 3177.0 | 3184.7 | 3187.3 |     |
| A4-py-TS-3 | 1 | -616.191076 | 0.204383 | 0.762092<br>(0.75) | -861.3 | 95.3   | 142.3  | 158.4  | 227.6  |     |
|            |   |             |          |                    | 235.0  | 253.9  | 268.1  | 358.0  | 398.3  |     |
|            |   |             |          |                    | 407.8  | 459.8  | 493.2  | 504.3  | 507.5  |     |
|            |   |             |          |                    | 522.1  | 548.9  | 552.5  | 582.1  | 592.6  |     |
|            |   |             |          |                    | 668.7  | 695.6  | 727.6  | 736.6  | 767.0  |     |
|            |   |             |          |                    | 782.4  | 807.9  | 824.4  | 829.2  | 836.8  |     |
|            |   |             |          |                    | 867.8  | 902.1  | 915.7  | 917.5  | 975.6  | 1.0 |
|            |   |             |          |                    | 976.7  | 983.9  | 989.9  | 1012.7 | 1047.0 | 0.6 |
|            |   |             |          |                    | 1090.8 | 1108.5 | 1115.7 | 1166.5 | 1189.1 | 0.4 |
|            |   |             |          |                    | 1198.7 | 1228.4 | 1229.6 | 1254.4 | 1263.2 |     |
|            |   |             |          |                    | 1318.1 | 1345.1 | 1376.5 | 1395.4 | 1425.4 |     |
|            |   |             |          |                    | 1447.2 | 1453.5 | 1458.6 | 1515.5 | 1530.0 |     |
|            |   |             |          |                    | 1594.0 | 1612.7 | 1631.8 | 1639.3 | 1661.6 |     |
|            |   |             |          |                    | 2351.9 | 3155.5 | 3157.7 | 3161.4 | 3163.7 |     |
|            |   |             |          |                    | 3169.8 | 3176.3 | 3178.1 | 3185.5 | 3191.8 |     |
| A4-py-P-1  | 2 | -615.030381 | 0.193272 | 0.757117<br>(0.75) | 100.8  | 149.9  | 214.6  | 244.9  | 271.6  | 1.0 |
|            |   |             |          |                    | 362.5  | 393.1  | 413.3  | 460.8  | 494.9  | 0.6 |

|           |   |             |          |                    |         |        |        |        |        |     |
|-----------|---|-------------|----------|--------------------|---------|--------|--------|--------|--------|-----|
|           |   |             |          |                    | 504.7   | 507.9  | 515.7  | 526.4  | 550.1  | 0.4 |
|           |   |             |          |                    | 565.7   | 594.7  | 674.0  | 697.2  | 713.9  |     |
|           |   |             |          |                    | 751.6   | 764.8  | 798.0  | 800.6  | 800.6  |     |
|           |   |             |          |                    | 832.0   | 842.3  | 865.4  | 867.7  | 912.5  |     |
|           |   |             |          |                    | 976.4   | 980.0  | 984.3  | 988.9  | 1007.7 |     |
|           |   |             |          |                    | 1084.8  | 1105.6 | 1129.9 | 1165.8 | 1166.9 |     |
|           |   |             |          |                    | 1201.3  | 1207.8 | 1250.2 | 1253.7 | 1266.7 |     |
|           |   |             |          |                    | 1319.8  | 1344.6 | 1371.9 | 1413.7 | 1415.0 |     |
|           |   |             |          |                    | 1443.9  | 1448.7 | 1476.2 | 1501.5 | 1528.0 |     |
|           |   |             |          |                    | 1544.9  | 1618.9 | 1620.1 | 1646.8 | 1665.5 |     |
|           |   |             |          |                    | 3158.0  | 3158.1 | 3161.2 | 3163.8 | 3165.2 |     |
|           |   |             |          |                    | 3168.8  | 3177.2 | 3177.4 | 3185.8 |        |     |
| A4-py-P-2 | 1 | -615.029483 | 0.193560 | 0.760432<br>(0.75) | 98.2    | 154.2  | 211.1  | 252.3  | 259.8  | 1.0 |
|           |   |             |          |                    | 361.4   | 406.0  | 410.8  | 462.3  | 486.0  | 0.6 |
|           |   |             |          |                    | 501.6   | 510.3  | 514.5  | 538.8  | 551.9  | 0.4 |
|           |   |             |          |                    | 572.3   | 596.5  | 684.9  | 700.0  | 714.4  |     |
|           |   |             |          |                    | 744.8   | 764.2  | 782.6  | 802.8  | 821.7  |     |
|           |   |             |          |                    | 831.4   | 836.5  | 855.8  | 909.9  | 940.2  |     |
|           |   |             |          |                    | 971.8   | 977.3  | 982.0  | 990.2  | 1005.4 |     |
|           |   |             |          |                    | 1095.6  | 1117.5 | 1135.0 | 1163.8 | 1175.7 |     |
|           |   |             |          |                    | 1196.9  | 1205.5 | 1239.6 | 1259.2 | 1266.3 |     |
|           |   |             |          |                    | 1325.5  | 1334.5 | 1386.8 | 1399.4 | 1422.0 |     |
|           |   |             |          |                    | 1440.2  | 1450.0 | 1469.6 | 1485.8 | 1525.7 |     |
|           |   |             |          |                    | 1585.2  | 1604.8 | 1629.7 | 1640.8 | 1665.1 |     |
|           |   |             |          |                    | 3157.1  | 3159.5 | 3160.8 | 3164.2 | 3169.3 |     |
|           |   |             |          |                    | 3175.7  | 3177.8 | 3185.5 | 3189.8 |        |     |
| A4-py-P-3 | 1 | -615.030254 | 0.193478 | 0.759530<br>(0.75) | 97.3    | 151.9  | 217.7  | 247.4  | 261.2  | 1.0 |
|           |   |             |          |                    | 355.7   | 397.2  | 407.5  | 461.6  | 485.6  | 0.6 |
|           |   |             |          |                    | 504.3   | 507.0  | 516.7  | 550.3  | 551.8  | 0.4 |
|           |   |             |          |                    | 582.2   | 596.9  | 663.2  | 700.4  | 726.6  |     |
|           |   |             |          |                    | 741.6   | 764.9  | 782.1  | 809.8  | 820.3  |     |
|           |   |             |          |                    | 826.8   | 837.5  | 860.4  | 906.0  | 916.5  |     |
|           |   |             |          |                    | 976.3   | 976.4  | 983.8  | 989.8  | 1012.2 |     |
|           |   |             |          |                    | 1089.0  | 1108.6 | 1113.4 | 1166.0 | 1184.2 |     |
|           |   |             |          |                    | 1197.3  | 1219.1 | 1229.7 | 1252.4 | 1262.2 |     |
|           |   |             |          |                    | 1313.0  | 1342.6 | 1365.4 | 1392.2 | 1424.7 |     |
|           |   |             |          |                    | 1445.6  | 1452.0 | 1455.4 | 1516.4 | 1528.8 |     |
|           |   |             |          |                    | 1595.1  | 1609.3 | 1630.5 | 1642.8 | 1661.0 |     |
|           |   |             |          |                    | 3156.4  | 3157.7 | 3161.6 | 3163.9 | 3170.3 |     |
|           |   |             |          |                    | 3176.6  | 3178.8 | 3185.6 | 3193.3 |        |     |
| A4-p      | 2 | -693.091929 | 0.240553 | 0                  | 80.2    | 83.9   | 127.3  | 175.4  | 208.2  | 0.8 |
|           |   |             |          |                    | 258.9   | 279.5  | 323.3  | 378.7  | 418.9  | 0.4 |
|           |   |             |          |                    | 439.1   | 440.5  | 478.9  | 519.6  | 524.9  | 0.3 |
|           |   |             |          |                    | 526.7   | 553.1  | 588.1  | 590.5  | 632.4  |     |
|           |   |             |          |                    | 686.3   | 690.1  | 706.6  | 756.2  | 761.7  |     |
|           |   |             |          |                    | 769.5   | 769.7  | 811.2  | 817.7  | 827.1  |     |
|           |   |             |          |                    | 853.0   | 865.8  | 883.2  | 889.2  | 962.5  |     |
|           |   |             |          |                    | 965.5   | 970.1  | 978.8  | 981.4  | 993.6  |     |
|           |   |             |          |                    | 1006.5  | 1015.1 | 1055.8 | 1072.1 | 1130.1 |     |
|           |   |             |          |                    | 1153.8  | 1168.4 | 1178.9 | 1182.2 | 1190.4 |     |
|           |   |             |          |                    | 1217.9  | 1235.9 | 1239.1 | 1254.5 | 1279.2 |     |
|           |   |             |          |                    | 1325.7  | 1352.2 | 1368.0 | 1385.4 | 1397.3 |     |
|           |   |             |          |                    | 1449.6  | 1449.7 | 1456.2 | 1484.3 | 1532.3 |     |
|           |   |             |          |                    | 1534.3  | 1557.9 | 1596.9 | 1638.2 | 1647.5 |     |
|           |   |             |          |                    | 1648.7  | 1667.3 | 3157.5 | 3158.8 | 3160.1 |     |
|           |   |             |          |                    | 3161.3  | 3169.9 | 3170.4 | 3177.2 | 3179.4 |     |
|           |   |             |          |                    | 3186.5  | 3187.2 | 3213.4 | 3231.2 |        |     |
| A4-p-TS-1 | 1 | -693.575980 | 0.238336 | 0.761741<br>(0.75) | -1076.4 | 78.2   | 84.9   | 126.4  | 173.1  | 0.8 |
|           |   |             |          |                    | 199.1   | 205.0  | 270.3  | 273.7  | 329.2  | 0.4 |
|           |   |             |          |                    | 373.0   | 383.2  | 434.2  | 435.1  | 443.8  | 0.2 |
|           |   |             |          |                    | 487.2   | 512.3  | 521.8  | 527.2  | 551.6  |     |
|           |   |             |          |                    | 577.3   | 598.9  | 621.4  | 677.6  | 683.8  |     |
|           |   |             |          |                    | 702.7   | 753.7  | 758.5  | 761.9  | 773.3  |     |
|           |   |             |          |                    | 813.4   | 819.4  | 824.9  | 851.9  | 858.0  |     |
|           |   |             |          |                    | 886.5   | 897.4  | 958.0  | 963.2  | 965.9  |     |
|           |   |             |          |                    | 976.9   | 979.3  | 986.3  | 1003.7 | 1010.4 |     |
|           |   |             |          |                    | 1052.5  | 1064.3 | 1111.5 | 1125.4 | 1149.0 |     |
|           |   |             |          |                    | 1173.4  | 1177.8 | 1184.8 | 1192.4 | 1218.2 |     |
|           |   |             |          |                    | 1238.0  | 1244.1 | 1264.8 | 1307.4 | 1343.6 |     |
|           |   |             |          |                    | 1361.9  | 1380.8 | 1394.4 | 1417.2 | 1442.2 |     |
|           |   |             |          |                    | 1453.9  | 1469.2 | 1510.3 | 1527.4 | 1544.5 |     |
|           |   |             |          |                    | 1580.9  | 1631.7 | 1640.5 | 1648.8 | 1665.1 |     |
|           |   |             |          |                    | 2067.6  | 3158.1 | 3159.2 | 3160.2 | 3161.5 |     |

|          |   |             |          |                    |                                                                                                                                                                                                      |                                                                                                                                                                                                    |                                                                                                                                                                                                    |                                                                                                                                                                                                     |                                                                                                                                                                                                     |                   |
|----------|---|-------------|----------|--------------------|------------------------------------------------------------------------------------------------------------------------------------------------------------------------------------------------------|----------------------------------------------------------------------------------------------------------------------------------------------------------------------------------------------------|----------------------------------------------------------------------------------------------------------------------------------------------------------------------------------------------------|-----------------------------------------------------------------------------------------------------------------------------------------------------------------------------------------------------|-----------------------------------------------------------------------------------------------------------------------------------------------------------------------------------------------------|-------------------|
|          |   |             |          |                    | 3167.6<br>3186.7                                                                                                                                                                                     | 3171.2<br>3215.4                                                                                                                                                                                   | 3177.3                                                                                                                                                                                             | 3179.6                                                                                                                                                                                              | 3183.8                                                                                                                                                                                              |                   |
| A4-p-P-1 | 1 | -692.426278 | 0.226870 | 0.758905<br>(0.75) | 46.6<br>253.2<br>428.1<br>521.6<br>672.0<br>760.7<br>851.1<br>959.0<br>1015.4<br>1173.2<br>1240.2<br>1362.4<br>1455.5<br>1580.6<br>3121.4<br>3167.4<br>3187.3                                        | 79.1<br>276.5<br>440.1<br>548.6<br>688.3<br>766.9<br>860.0<br>965.8<br>1056.3<br>1179.2<br>1243.5<br>1380.5<br>1467.3<br>1633.0<br>3157.2<br>3172.1                                                | 143.5<br>317.2<br>492.1<br>568.6<br>708.5<br>808.7<br>880.0<br>974.0<br>1063.6<br>1183.2<br>1262.1<br>1399.5<br>1502.2<br>1645.3<br>3158.2<br>3176.5                                               | 167.2<br>381.9<br>507.9<br>595.7<br>744.1<br>816.8<br>889.3<br>983.9<br>1119.2<br>1187.5<br>1303.3<br>1416.9<br>1528.9<br>1649.6<br>3159.3<br>3179.2                                                | 174.8<br>417.4<br>510.4<br>626.9<br>746.8<br>829.2<br>956.4<br>994.2<br>1149.8<br>1218.4<br>1338.5<br>1444.4<br>1542.0<br>1668.5<br>3161.0<br>3182.3                                                | 0.8<br>0.4<br>0.2 |
| A5       | 4 | -846.707249 | 0.285786 | 0                  | 38.5<br>193.3<br>349.4<br>473.1<br>525.7<br>647.3<br>752.3<br>795.6<br>876.4<br>922.2<br>995.6<br>1144.2<br>1207.2<br>1295.3<br>1376.5<br>1434.6<br>1557.9<br>1642.1<br>3157.0<br>3162.1<br>3188.7   | 71.2<br>238.4<br>362.2<br>478.5<br>553.7<br>715.8<br>753.0<br>837.7<br>889.4<br>923.6<br>995.6<br>1158.5<br>1210.2<br>1312.4<br>1411.0<br>1477.4<br>1576.8<br>1673.0<br>3158.5<br>3164.1<br>3188.9 | 102.3<br>240.8<br>380.3<br>479.9<br>579.5<br>725.3<br>762.2<br>842.9<br>890.3<br>936.5<br>1016.7<br>1184.9<br>1242.5<br>1319.0<br>1417.5<br>1478.6<br>1578.9<br>1673.8<br>3158.7<br>3165.1         | 119.2<br>263.6<br>454.3<br>491.0<br>616.6<br>744.6<br>771.4<br>842.9<br>902.8<br>973.3<br>1019.4<br>1188.5<br>1251.2<br>1333.8<br>1419.3<br>1493.4<br>1594.0<br>3155.3<br>3159.5<br>3176.9          | 149.1<br>293.9<br>471.6<br>512.9<br>639.5<br>746.7<br>775.1<br>848.8<br>917.8<br>973.8<br>1134.0<br>1200.0<br>1294.4<br>1358.7<br>1427.2<br>1542.5<br>1633.7<br>3156.6<br>3161.2<br>3176.9          | 1.3<br>0.1<br>0.1 |
| A5-TS-1  | 2 | -847.191324 | 0.283728 | 0.836254<br>(0.75) | -857.1<br>126.0<br>263.3<br>381.5<br>493.2<br>579.3<br>724.8<br>752.5<br>837.5<br>899.1<br>937.4<br>1017.7<br>1164.5<br>1219.9<br>1307.8<br>1379.7<br>1474.0<br>1574.5<br>1670.4<br>3160.0<br>3176.5 | 38.1<br>163.0<br>273.5<br>460.9<br>503.2<br>611.9<br>737.5<br>769.4<br>849.4<br>901.9<br>973.8<br>1019.8<br>1179.9<br>1242.5<br>1330.4<br>1418.0<br>1487.9<br>1588.6<br>2343.1<br>3163.4<br>3178.1 | 70.2<br>193.4<br>292.8<br>467.9<br>509.0<br>633.3<br>744.9<br>770.3<br>856.2<br>910.5<br>974.0<br>1063.1<br>1190.1<br>1264.0<br>1353.1<br>1422.9<br>1507.1<br>1616.9<br>3155.4<br>3164.7<br>3178.2 | 102.0<br>230.0<br>341.6<br>472.1<br>524.9<br>637.8<br>749.8<br>792.7<br>889.2<br>914.5<br>996.3<br>1136.6<br>1193.0<br>1278.4<br>1370.0<br>1426.6<br>1529.9<br>1636.7<br>3156.1<br>3165.0<br>3189.4 | 119.0<br>239.1<br>360.3<br>473.6<br>550.2<br>705.8<br>750.7<br>817.9<br>891.9<br>921.7<br>996.3<br>1148.1<br>1205.1<br>1301.1<br>1375.7<br>1472.1<br>1574.2<br>1670.4<br>3159.8<br>3176.3<br>3189.6 | 1.3<br>0.1<br>0.1 |
| A5-TS-2  | 1 | -847.191233 | 0.283798 | 0.814992<br>(0.75) | -855.8<br>139.9<br>256.7<br>381.6<br>490.7<br>578.3<br>718.4<br>757.1<br>838.9<br>894.5<br>931.8<br>1017.3                                                                                           | 38.3<br>151.0<br>271.9<br>451.8<br>501.0<br>614.4<br>737.5<br>764.0<br>847.7<br>905.8<br>972.9<br>1019.2                                                                                           | 68.9<br>192.3<br>293.5<br>466.7<br>516.6<br>628.2<br>746.7<br>773.1<br>856.4<br>915.4<br>974.0<br>1064.0                                                                                           | 100.9<br>237.1<br>346.1<br>473.1<br>521.7<br>642.3<br>748.3<br>799.2<br>876.8<br>918.0<br>996.0<br>1140.9                                                                                           | 118.6<br>239.8<br>364.9<br>475.9<br>548.6<br>707.6<br>751.8<br>829.3<br>891.2<br>918.9<br>996.3<br>1146.4                                                                                           | 1.3<br>0.1<br>0.1 |

|         |   |             |          |                    |        |        |        |        |        |     |
|---------|---|-------------|----------|--------------------|--------|--------|--------|--------|--------|-----|
|         |   |             |          |                    | 1155.8 | 1181.1 | 1188.8 | 1197.6 | 1207.5 |     |
|         |   |             |          |                    | 1236.5 | 1238.4 | 1253.0 | 1278.8 | 1303.2 |     |
|         |   |             |          |                    | 1310.5 | 1328.7 | 1353.3 | 1371.6 | 1382.1 |     |
|         |   |             |          |                    | 1389.0 | 1406.0 | 1418.3 | 1429.8 | 1471.6 |     |
|         |   |             |          |                    | 1475.6 | 1490.5 | 1510.2 | 1542.5 | 1565.1 |     |
|         |   |             |          |                    | 1576.3 | 1590.3 | 1620.6 | 1638.7 | 1666.4 |     |
|         |   |             |          |                    | 1671.6 | 2346.1 | 3155.6 | 3157.8 | 3158.8 |     |
|         |   |             |          |                    | 3160.1 | 3160.4 | 3162.9 | 3164.9 | 3170.6 |     |
|         |   |             |          |                    | 3177.3 | 3178.1 | 3183.1 | 3189.1 | 3193.4 |     |
| A5-TS-3 | 1 | -847.191926 | 0.283651 | 0.776766<br>(0.75) | -858.1 | 38.4   | 67.3   | 101.9  | 117.7  |     |
|         |   |             |          |                    | 135.7  | 176.1  | 192.9  | 215.6  | 242.5  |     |
|         |   |             |          |                    | 254.0  | 272.4  | 293.9  | 346.8  | 367.1  |     |
|         |   |             |          |                    | 381.9  | 453.2  | 470.3  | 474.3  | 478.8  |     |
|         |   |             |          |                    | 491.7  | 495.0  | 510.6  | 515.3  | 545.6  |     |
|         |   |             |          |                    | 573.9  | 606.5  | 632.1  | 645.8  | 709.0  |     |
|         |   |             |          |                    | 723.0  | 738.9  | 741.7  | 749.9  | 759.6  |     |
|         |   |             |          |                    | 760.8  | 771.6  | 774.3  | 794.6  | 836.7  |     |
|         |   |             |          |                    | 842.2  | 845.9  | 865.1  | 879.4  | 889.5  |     |
|         |   |             |          |                    | 890.3  | 900.1  | 901.3  | 911.2  | 917.7  | 1.3 |
|         |   |             |          |                    | 926.3  | 930.5  | 974.2  | 978.3  | 996.4  | 0.1 |
|         |   |             |          |                    | 1008.8 | 1018.2 | 1061.4 | 1127.5 | 1139.7 | 0.1 |
|         |   |             |          |                    | 1155.0 | 1179.6 | 1187.0 | 1201.0 | 1205.4 |     |
|         |   |             |          |                    | 1229.2 | 1246.7 | 1283.1 | 1294.7 | 1309.4 |     |
|         |   |             |          |                    | 1313.4 | 1326.0 | 1350.4 | 1357.1 | 1396.8 |     |
|         |   |             |          |                    | 1403.8 | 1411.7 | 1417.3 | 1431.4 | 1450.2 |     |
|         |   |             |          |                    | 1476.1 | 1486.1 | 1532.3 | 1543.2 | 1557.3 |     |
|         |   |             |          |                    | 1577.6 | 1592.0 | 1631.0 | 1640.3 | 1663.8 |     |
|         |   |             |          |                    | 1673.2 | 2353.6 | 3155.4 | 3156.7 | 3158.5 |     |
|         |   |             |          |                    | 3159.2 | 3159.7 | 3161.6 | 3162.8 | 3165.1 |     |
|         |   |             |          |                    | 3168.1 | 3176.3 | 3177.2 | 3182.8 | 3189.0 |     |
| A5-TS-4 | 1 | -847.192313 | 0.283528 | 0.775798<br>(0.75) | -850.1 | 38.2   | 70.5   | 99.1   | 117.3  |     |
|         |   |             |          |                    | 143.1  | 169.7  | 206.1  | 210.2  | 246.9  |     |
|         |   |             |          |                    | 250.8  | 263.3  | 295.0  | 352.4  | 365.7  |     |
|         |   |             |          |                    | 376.4  | 455.0  | 461.2  | 471.8  | 476.3  |     |
|         |   |             |          |                    | 479.4  | 487.3  | 510.5  | 523.4  | 549.1  |     |
|         |   |             |          |                    | 573.4  | 610.6  | 637.1  | 646.9  | 706.3  |     |
|         |   |             |          |                    | 718.4  | 739.2  | 743.2  | 749.6  | 761.5  |     |
|         |   |             |          |                    | 761.6  | 774.0  | 781.2  | 794.6  | 833.2  |     |
|         |   |             |          |                    | 837.6  | 845.9  | 852.7  | 875.1  | 884.7  |     |
|         |   |             |          |                    | 890.7  | 891.0  | 900.6  | 909.9  | 918.0  | 1.3 |
|         |   |             |          |                    | 926.2  | 930.9  | 971.2  | 974.1  | 996.3  | 0.1 |
|         |   |             |          |                    | 1007.6 | 1018.1 | 1047.3 | 1131.7 | 1146.5 | 0.1 |
|         |   |             |          |                    | 1157.9 | 1186.4 | 1194.1 | 1201.9 | 1205.7 |     |
|         |   |             |          |                    | 1237.3 | 1247.7 | 1289.1 | 1293.6 | 1299.2 |     |
|         |   |             |          |                    | 1315.9 | 1323.5 | 1335.7 | 1357.7 | 1395.2 |     |
|         |   |             |          |                    | 1404.8 | 1416.6 | 1422.9 | 1430.0 | 1449.7 |     |
|         |   |             |          |                    | 1469.7 | 1486.6 | 1539.1 | 1552.6 | 1565.9 |     |
|         |   |             |          |                    | 1577.6 | 1588.0 | 1624.3 | 1633.3 | 1651.6 |     |
|         |   |             |          |                    | 1673.2 | 2377.2 | 3155.8 | 3156.7 | 3157.6 |     |
|         |   |             |          |                    | 3158.3 | 3158.6 | 3159.9 | 3160.7 | 3162.0 |     |
|         |   |             |          |                    | 3163.6 | 3165.2 | 3177.2 | 3180.4 | 3189.0 |     |
| A5-P-1  | 2 | -846.030956 | 0.272776 | 0.859238<br>(0.75) | 38.1   | 69.9   | 101.9  | 118.3  | 148.6  |     |
|         |   |             |          |                    | 191.9  | 235.3  | 238.6  | 262.6  | 292.4  |     |
|         |   |             |          |                    | 339.4  | 360.6  | 381.3  | 453.8  | 463.1  |     |
|         |   |             |          |                    | 470.7  | 473.1  | 491.7  | 504.8  | 506.2  |     |
|         |   |             |          |                    | 524.8  | 550.4  | 578.7  | 616.0  | 637.1  |     |
|         |   |             |          |                    | 641.9  | 702.3  | 724.0  | 735.2  | 744.6  |     |
|         |   |             |          |                    | 751.0  | 752.4  | 756.6  | 769.5  | 770.1  |     |
|         |   |             |          |                    | 792.4  | 823.6  | 833.8  | 849.2  | 855.3  |     |
|         |   |             |          |                    | 888.6  | 896.1  | 899.9  | 901.5  | 911.2  |     |
|         |   |             |          |                    | 921.3  | 936.7  | 973.4  | 973.5  | 995.9  | 1.4 |
|         |   |             |          |                    | 995.9  | 1018.2 | 1020.0 | 1137.4 | 1146.0 | 0.1 |
|         |   |             |          |                    | 1163.3 | 1176.6 | 1189.7 | 1190.2 | 1204.6 | 0.1 |
|         |   |             |          |                    | 1214.6 | 1242.3 | 1261.9 | 1277.2 | 1299.7 |     |
|         |   |             |          |                    | 1305.4 | 1329.8 | 1354.2 | 1361.7 | 1369.8 |     |
|         |   |             |          |                    | 1374.8 | 1417.6 | 1421.2 | 1422.9 | 1471.4 |     |
|         |   |             |          |                    | 1472.8 | 1483.5 | 1500.9 | 1529.0 | 1573.1 |     |
|         |   |             |          |                    | 1573.5 | 1587.9 | 1614.8 | 1634.8 | 1668.9 |     |
|         |   |             |          |                    | 1669.6 | 3155.1 | 3155.6 | 3159.5 | 3159.7 |     |
|         |   |             |          |                    | 3164.2 | 3164.4 | 3165.8 | 3176.3 | 3176.5 |     |
|         |   |             |          |                    | 3177.9 | 3178.1 | 3189.2 | 3189.3 |        |     |
| A5-P-2  | 1 | -846.030853 | 0.272841 | 0.832661<br>(0.75) | 38.0   | 70.4   | 100.9  | 118.5  | 146.0  | 1.4 |
|         |   |             |          |                    | 191.6  | 236.0  | 236.8  | 263.2  | 292.9  | 0.1 |

|        |   |             |          |                    |        |        |        |        |        |     |
|--------|---|-------------|----------|--------------------|--------|--------|--------|--------|--------|-----|
|        |   |             |          |                    | 345.0  | 357.0  | 381.4  | 446.6  | 462.1  | 0.1 |
|        |   |             |          |                    | 471.8  | 475.5  | 490.7  | 503.9  | 513.7  |     |
|        |   |             |          |                    | 520.9  | 548.5  | 578.9  | 613.7  | 636.8  |     |
|        |   |             |          |                    | 643.1  | 705.5  | 721.4  | 742.0  | 744.6  |     |
|        |   |             |          |                    | 747.3  | 751.2  | 758.5  | 763.9  | 773.1  |     |
|        |   |             |          |                    | 798.2  | 832.2  | 836.3  | 847.4  | 857.7  |     |
|        |   |             |          |                    | 876.3  | 890.6  | 891.8  | 912.9  | 917.5  |     |
|        |   |             |          |                    | 920.3  | 932.7  | 972.4  | 973.7  | 995.6  |     |
|        |   |             |          |                    | 996.1  | 1016.0 | 1018.9 | 1139.7 | 1144.3 |     |
|        |   |             |          |                    | 1155.0 | 1178.3 | 1188.1 | 1195.9 | 1206.5 |     |
|        |   |             |          |                    | 1233.4 | 1238.3 | 1249.5 | 1276.8 | 1301.8 |     |
|        |   |             |          |                    | 1310.0 | 1328.0 | 1352.5 | 1369.8 | 1373.4 |     |
|        |   |             |          |                    | 1383.6 | 1402.5 | 1417.8 | 1429.1 | 1469.8 |     |
|        |   |             |          |                    | 1475.3 | 1489.5 | 1502.1 | 1541.0 | 1563.6 |     |
|        |   |             |          |                    | 1575.8 | 1589.7 | 1619.4 | 1638.1 | 1664.6 |     |
|        |   |             |          |                    | 1671.0 | 3155.4 | 3157.8 | 3158.6 | 3160.0 |     |
|        |   |             |          |                    | 3160.3 | 3163.8 | 3164.8 | 3170.6 | 3177.2 |     |
|        |   |             |          |                    | 3177.9 | 3182.7 | 3189.0 | 3193.4 |        |     |
| A5-P-3 | 1 | -846.031153 | 0.272676 | 0.781544<br>(0.75) | 38.3   | 71.8   | 101.6  | 119.4  | 149.2  | 1.4 |
|        |   |             |          |                    | 191.8  | 237.9  | 238.5  | 264.3  | 293.3  | 0.1 |
|        |   |             |          |                    | 344.1  | 361.4  | 381.5  | 453.3  | 467.8  | 0.1 |
|        |   |             |          |                    | 473.8  | 478.6  | 491.7  | 494.0  | 507.1  |     |
|        |   |             |          |                    | 510.1  | 544.1  | 572.4  | 615.9  | 636.6  |     |
|        |   |             |          |                    | 645.7  | 704.0  | 721.8  | 731.4  | 744.6  |     |
|        |   |             |          |                    | 749.8  | 757.3  | 761.0  | 768.3  | 774.2  |     |
|        |   |             |          |                    | 796.2  | 836.9  | 840.8  | 846.0  | 861.6  |     |
|        |   |             |          |                    | 874.8  | 889.0  | 891.9  | 900.9  | 905.3  |     |
|        |   |             |          |                    | 917.4  | 925.3  | 931.1  | 972.7  | 974.1  |     |
|        |   |             |          |                    | 996.3  | 1013.2 | 1018.7 | 1128.6 | 1138.9 |     |
|        |   |             |          |                    | 1155.0 | 1172.7 | 1186.7 | 1200.2 | 1204.2 |     |
|        |   |             |          |                    | 1227.1 | 1246.3 | 1280.6 | 1294.0 | 1308.5 |     |
|        |   |             |          |                    | 1310.7 | 1323.1 | 1343.5 | 1356.1 | 1392.1 |     |
|        |   |             |          |                    | 1400.5 | 1408.4 | 1416.5 | 1431.0 | 1446.2 |     |
|        |   |             |          |                    | 1475.4 | 1485.6 | 1529.0 | 1540.6 | 1555.6 |     |
|        |   |             |          |                    | 1577.5 | 1591.0 | 1630.0 | 1639.9 | 1663.5 |     |
|        |   |             |          |                    | 1672.9 | 3155.1 | 3156.4 | 3158.0 | 3158.9 |     |
|        |   |             |          |                    | 3159.4 | 3161.0 | 3162.1 | 3164.8 | 3169.4 |     |
|        |   |             |          |                    | 3177.0 | 3177.2 | 3182.5 | 3189.0 |        |     |
| A5-P-4 | 1 | -846.031154 | 0.272548 | 0.779037<br>(0.75) | 39.0   | 71.8   | 103.6  | 120.2  | 150.0  | 1.3 |
|        |   |             |          |                    | 194.8  | 239.8  | 242.3  | 263.8  | 292.8  | 0.1 |
|        |   |             |          |                    | 350.9  | 363.5  | 374.8  | 450.9  | 454.6  | 0.1 |
|        |   |             |          |                    | 471.6  | 475.9  | 479.1  | 488.8  | 512.1  |     |
|        |   |             |          |                    | 522.3  | 548.3  | 576.7  | 608.9  | 635.8  |     |
|        |   |             |          |                    | 646.7  | 698.8  | 721.6  | 733.0  | 741.8  |     |
|        |   |             |          |                    | 749.5  | 760.0  | 761.1  | 773.6  | 776.3  |     |
|        |   |             |          |                    | 794.2  | 822.0  | 837.9  | 845.7  | 849.4  |     |
|        |   |             |          |                    | 873.6  | 889.1  | 892.8  | 897.9  | 900.8  |     |
|        |   |             |          |                    | 917.0  | 924.3  | 931.3  | 967.0  | 973.9  |     |
|        |   |             |          |                    | 996.1  | 1017.9 | 1027.7 | 1129.6 | 1144.0 |     |
|        |   |             |          |                    | 1155.0 | 1185.6 | 1189.9 | 1200.5 | 1204.9 |     |
|        |   |             |          |                    | 1235.0 | 1246.7 | 1278.6 | 1292.1 | 1296.1 |     |
|        |   |             |          |                    | 1314.8 | 1320.6 | 1332.7 | 1357.1 | 1392.3 |     |
|        |   |             |          |                    | 1402.3 | 1416.1 | 1420.6 | 1428.9 | 1444.9 |     |
|        |   |             |          |                    | 1468.8 | 1486.1 | 1537.3 | 1549.8 | 1559.5 |     |
|        |   |             |          |                    | 1577.4 | 1591.0 | 1622.5 | 1633.4 | 1649.6 |     |
|        |   |             |          |                    | 1673.0 | 3155.5 | 3156.2 | 3157.5 | 3158.1 |     |
|        |   |             |          |                    | 3158.7 | 3159.7 | 3160.7 | 3161.8 | 3163.6 |     |
|        |   |             |          |                    | 3165.1 | 3177.0 | 3182.4 | 3188.9 |        |     |
| A5-p   | 2 | -846.713599 | 0.286801 | 0                  | 65.0   | 71.8   | 90.2   | 121.1  | 169.5  | 0.4 |
|        |   |             |          |                    | 174.6  | 229.3  | 245.9  | 276.0  | 312.8  | 0.3 |
|        |   |             |          |                    | 343.2  | 399.1  | 420.0  | 420.9  | 451.2  | 0.2 |
|        |   |             |          |                    | 471.3  | 477.5  | 496.2  | 527.1  | 537.4  |     |
|        |   |             |          |                    | 545.3  | 552.2  | 576.7  | 611.3  | 635.2  |     |
|        |   |             |          |                    | 659.9  | 679.2  | 691.7  | 724.7  | 736.1  |     |
|        |   |             |          |                    | 753.5  | 765.7  | 779.0  | 785.6  | 798.4  |     |
|        |   |             |          |                    | 805.2  | 817.3  | 840.1  | 856.6  | 866.8  |     |
|        |   |             |          |                    | 884.2  | 884.9  | 937.6  | 949.7  | 960.8  |     |
|        |   |             |          |                    | 967.4  | 969.4  | 978.2  | 981.5  | 997.5  |     |
|        |   |             |          |                    | 998.8  | 1047.3 | 1058.8 | 1082.9 | 1094.8 |     |
|        |   |             |          |                    | 1151.3 | 1166.3 | 1172.0 | 1179.6 | 1183.4 |     |
|        |   |             |          |                    | 1184.7 | 1208.0 | 1225.1 | 1234.4 | 1239.1 |     |
|        |   |             |          |                    | 1249.3 | 1286.1 | 1297.9 | 1343.9 | 1357.0 |     |
|        |   |             |          |                    | 1364.7 | 1374.2 | 1398.0 | 1412.0 | 1448.2 |     |

|           |   |             |          |                    |         |        |        |        |        |     |
|-----------|---|-------------|----------|--------------------|---------|--------|--------|--------|--------|-----|
|           |   |             |          |                    | 1448.7  | 1466.1 | 1472.6 | 1515.1 | 1526.6 |     |
|           |   |             |          |                    | 1547.1  | 1555.0 | 1590.3 | 1623.0 | 1647.5 |     |
|           |   |             |          |                    | 1649.1  | 1655.8 | 1661.5 | 3157.5 | 3157.9 |     |
|           |   |             |          |                    | 3159.7  | 3160.2 | 3162.2 | 3170.8 | 3171.0 |     |
|           |   |             |          |                    | 3177.0  | 3177.9 | 3180.8 | 3186.3 | 3186.6 |     |
|           |   |             |          |                    | 3217.8  | 3218.5 |        |        |        |     |
| A5-p-TS-1 | 1 | -847.197221 | 0.284594 | 0.761983<br>(0.75) | -1015.3 | 62.4   | 74.2   | 90.4   | 120.4  |     |
|           |   |             |          |                    | 158.2   | 165.8  | 207.2  | 235.7  | 244.9  |     |
|           |   |             |          |                    | 277.2   | 309.9  | 342.0  | 362.2  | 398.6  |     |
|           |   |             |          |                    | 420.3   | 426.1  | 449.9  | 472.2  | 482.4  |     |
|           |   |             |          |                    | 499.5   | 520.8  | 536.3  | 545.2  | 556.3  |     |
|           |   |             |          |                    | 569.6   | 613.9  | 623.7  | 653.4  | 671.3  |     |
|           |   |             |          |                    | 690.7   | 720.6  | 729.8  | 754.7  | 763.9  |     |
|           |   |             |          |                    | 775.2   | 784.4  | 793.1  | 805.9  | 819.8  |     |
|           |   |             |          |                    | 838.2   | 855.6  | 859.9  | 882.3  | 893.1  |     |
|           |   |             |          |                    | 935.4   | 940.7  | 945.6  | 960.6  | 965.5  | 0.4 |
|           |   |             |          |                    | 971.2   | 978.0  | 981.8  | 994.9  | 1042.6 | 0.3 |
|           |   |             |          |                    | 1053.8  | 1076.9 | 1080.9 | 1108.9 | 1146.7 | 0.2 |
|           |   |             |          |                    | 1166.2  | 1173.6 | 1179.0 | 1184.4 | 1192.6 |     |
|           |   |             |          |                    | 1209.5  | 1224.6 | 1234.6 | 1241.9 | 1262.2 |     |
|           |   |             |          |                    | 1292.2  | 1336.9 | 1347.1 | 1361.6 | 1375.2 |     |
|           |   |             |          |                    | 1390.6  | 1408.8 | 1422.2 | 1444.2 | 1452.0 |     |
|           |   |             |          |                    | 1468.8  | 1502.3 | 1513.0 | 1537.8 | 1545.5 |     |
|           |   |             |          |                    | 1576.4  | 1616.6 | 1641.6 | 1648.1 | 1651.8 |     |
|           |   |             |          |                    | 1660.4  | 2153.4 | 3157.8 | 3158.3 | 3159.8 |     |
|           |   |             |          |                    | 3160.3  | 3162.6 | 3167.9 | 3171.1 | 3177.2 |     |
|           |   |             |          |                    | 3178.0  | 3181.2 | 3183.2 | 3186.6 | 3223.4 |     |
| A5-p-TS-2 | 1 | -847.198594 | 0.284602 | 0.760989<br>(0.75) | -847.6  | 63.8   | 70.5   | 88.6   | 119.3  |     |
|           |   |             |          |                    | 147.6   | 169.0  | 198.7  | 217.1  | 238.9  |     |
|           |   |             |          |                    | 250.1   | 282.6  | 313.4  | 345.3  | 400.3  |     |
|           |   |             |          |                    | 414.9   | 419.9  | 450.0  | 470.3  | 477.3  |     |
|           |   |             |          |                    | 495.8   | 520.8  | 531.1  | 542.3  | 553.3  |     |
|           |   |             |          |                    | 569.0   | 612.4  | 631.0  | 652.9  | 676.6  |     |
|           |   |             |          |                    | 691.0   | 719.2  | 727.9  | 757.3  | 772.0  |     |
|           |   |             |          |                    | 776.0   | 779.3  | 791.6  | 810.1  | 824.1  |     |
|           |   |             |          |                    | 840.1   | 854.8  | 860.3  | 880.8  | 884.9  |     |
|           |   |             |          |                    | 915.4   | 926.1  | 944.6  | 956.1  | 963.0  | 0.4 |
|           |   |             |          |                    | 969.3   | 977.6  | 981.8  | 998.7  | 1025.5 | 0.3 |
|           |   |             |          |                    | 1045.3  | 1062.3 | 1085.3 | 1093.3 | 1147.8 | 0.2 |
|           |   |             |          |                    | 1162.2  | 1173.3 | 1178.9 | 1184.1 | 1202.3 |     |
|           |   |             |          |                    | 1216.2  | 1230.3 | 1234.3 | 1244.6 | 1274.4 |     |
|           |   |             |          |                    | 1288.5  | 1328.2 | 1349.6 | 1360.2 | 1374.3 |     |
|           |   |             |          |                    | 1391.7  | 1406.4 | 1414.1 | 1445.2 | 1451.5 |     |
|           |   |             |          |                    | 1467.3  | 1502.8 | 1513.6 | 1538.4 | 1549.2 |     |
|           |   |             |          |                    | 1585.3  | 1612.7 | 1621.7 | 1648.4 | 1654.0 |     |
|           |   |             |          |                    | 1660.7  | 2382.1 | 3155.6 | 3158.3 | 3160.3 |     |
|           |   |             |          |                    | 3161.0  | 3163.0 | 3172.1 | 3177.7 | 3178.7 |     |
|           |   |             |          |                    | 3179.8  | 3181.5 | 3187.3 | 3202.6 | 3217.7 |     |
| A5-p-P-1  | 1 | -846.043028 | 0.273615 | 0.759823<br>(0.75) | 52.5    | 70.4   | 92.1   | 121.3  | 159.1  |     |
|           |   |             |          |                    | 182.4   | 224.1  | 235.8  | 274.2  | 304.6  |     |
|           |   |             |          |                    | 348.3   | 398.7  | 419.7  | 425.8  | 450.0  |     |
|           |   |             |          |                    | 472.1   | 475.0  | 504.5  | 518.2  | 532.9  |     |
|           |   |             |          |                    | 543.3   | 553.2  | 568.3  | 615.9  | 627.3  |     |
|           |   |             |          |                    | 651.0   | 675.0  | 691.7  | 718.9  | 727.6  |     |
|           |   |             |          |                    | 750.5   | 758.9  | 775.0  | 784.5  | 794.6  |     |
|           |   |             |          |                    | 805.7   | 822.4  | 838.1  | 856.4  | 861.4  |     |
|           |   |             |          |                    | 881.6   | 888.0  | 936.7  | 942.4  | 960.9  |     |
|           |   |             |          |                    | 964.6   | 968.7  | 977.1  | 982.0  | 992.7  | 0.4 |
|           |   |             |          |                    | 1048.6  | 1058.7 | 1080.8 | 1088.5 | 1147.1 | 0.3 |
|           |   |             |          |                    | 1166.6  | 1173.9 | 1179.9 | 1183.6 | 1187.1 | 0.2 |
|           |   |             |          |                    | 1209.5  | 1226.6 | 1235.2 | 1241.7 | 1260.2 |     |
|           |   |             |          |                    | 1290.2  | 1333.3 | 1348.2 | 1360.0 | 1377.4 |     |
|           |   |             |          |                    | 1389.0  | 1410.8 | 1421.0 | 1445.8 | 1451.3 |     |
|           |   |             |          |                    | 1467.5  | 1493.7 | 1513.8 | 1535.3 | 1545.9 |     |
|           |   |             |          |                    | 1574.4  | 1616.2 | 1644.3 | 1646.2 | 1654.0 |     |
|           |   |             |          |                    | 1661.7  | 3156.5 | 3158.0 | 3158.5 | 3160.5 |     |
|           |   |             |          |                    | 3162.4  | 3167.0 | 3171.3 | 3176.4 | 3178.1 |     |
|           |   |             |          |                    | 3180.5  | 3181.3 | 3186.5 | 3221.9 |        |     |
| A5-p-P-2  | 1 | -846.037373 | 0.273653 | 0.758026<br>(0.75) | 65.1    | 72.0   | 90.4   | 120.6  | 172.0  |     |
|           |   |             |          |                    | 177.6   | 230.9  | 245.0  | 278.7  | 312.4  | 0.5 |
|           |   |             |          |                    | 343.3   | 399.4  | 413.0  | 419.6  | 449.8  | 0.3 |
|           |   |             |          |                    | 469.9   | 477.1  | 496.7  | 518.4  | 537.7  | 0.2 |
|           |   |             |          |                    | 545.3   | 552.1  | 567.4  | 611.7  | 626.5  |     |

|           |   |             |          |                    |         |        |        |        |        |     |
|-----------|---|-------------|----------|--------------------|---------|--------|--------|--------|--------|-----|
|           |   |             |          |                    | 650.8   | 673.6  | 691.4  | 717.5  | 727.5  |     |
|           |   |             |          |                    | 756.8   | 764.2  | 774.2  | 782.2  | 791.4  |     |
|           |   |             |          |                    | 809.2   | 820.8  | 838.4  | 856.8  | 859.9  |     |
|           |   |             |          |                    | 881.2   | 884.9  | 931.7  | 944.7  | 951.4  |     |
|           |   |             |          |                    | 962.4   | 968.9  | 976.3  | 981.5  | 998.4  |     |
|           |   |             |          |                    | 1047.6  | 1062.7 | 1081.9 | 1091.4 | 1143.2 |     |
|           |   |             |          |                    | 1160.7  | 1172.6 | 1178.5 | 1183.7 | 1201.0 |     |
|           |   |             |          |                    | 1215.0  | 1228.3 | 1233.3 | 1244.3 | 1267.8 |     |
|           |   |             |          |                    | 1286.8  | 1321.9 | 1343.2 | 1359.4 | 1374.1 |     |
|           |   |             |          |                    | 1389.3  | 1402.9 | 1414.3 | 1442.3 | 1450.6 |     |
|           |   |             |          |                    | 1466.9  | 1496.7 | 1513.7 | 1536.1 | 1549.2 |     |
|           |   |             |          |                    | 1582.9  | 1610.4 | 1621.6 | 1648.2 | 1653.6 |     |
|           |   |             |          |                    | 1660.6  | 3154.3 | 3158.6 | 3160.3 | 3161.1 |     |
|           |   |             |          |                    | 3163.1  | 3172.1 | 3178.0 | 3179.0 | 3181.0 |     |
|           |   |             |          |                    | 3181.7  | 3187.4 | 3200.3 | 3218.3 |        |     |
| A5-a      | 2 | -846.732352 | 0.286748 | 0                  | 41.5    | 54.6   | 106.5  | 115.7  | 125.3  |     |
|           |   |             |          |                    | 185.3   | 215.0  | 251.4  | 282.0  | 305.3  |     |
|           |   |             |          |                    | 310.5   | 408.5  | 413.6  | 415.7  | 433.2  |     |
|           |   |             |          |                    | 442.8   | 501.9  | 524.8  | 528.9  | 530.3  |     |
|           |   |             |          |                    | 534.7   | 567.0  | 569.1  | 580.2  | 606.7  |     |
|           |   |             |          |                    | 663.9   | 677.7  | 723.1  | 730.7  | 735.7  |     |
|           |   |             |          |                    | 753.5   | 757.3  | 779.7  | 786.0  | 789.3  |     |
|           |   |             |          |                    | 799.2   | 815.2  | 828.4  | 869.1  | 876.6  |     |
|           |   |             |          |                    | 877.4   | 879.3  | 898.4  | 907.1  | 952.3  |     |
|           |   |             |          |                    | 955.0   | 978.6  | 979.2  | 981.5  | 991.2  | 0.7 |
|           |   |             |          |                    | 992.4   | 1018.7 | 1060.8 | 1068.2 | 1126.5 | 0.2 |
|           |   |             |          |                    | 1133.5  | 1168.6 | 1179.3 | 1182.3 | 1189.8 | 0.1 |
|           |   |             |          |                    | 1198.0  | 1224.9 | 1239.0 | 1248.1 | 1260.4 |     |
|           |   |             |          |                    | 1290.4  | 1292.8 | 1310.4 | 1330.7 | 1353.4 |     |
|           |   |             |          |                    | 1362.9  | 1377.4 | 1411.7 | 1445.5 | 1455.6 |     |
|           |   |             |          |                    | 1456.7  | 1466.4 | 1484.3 | 1508.9 | 1526.0 |     |
|           |   |             |          |                    | 1549.5  | 1589.5 | 1599.9 | 1634.6 | 1649.1 |     |
|           |   |             |          |                    | 1651.2  | 1660.3 | 1666.2 | 3155.6 | 3157.4 |     |
|           |   |             |          |                    | 3158.7  | 3160.2 | 3160.6 | 3169.6 | 3169.9 |     |
|           |   |             |          |                    | 3177.0  | 3177.6 | 3184.1 | 3185.0 | 3193.5 |     |
|           |   |             |          |                    | 3196.4  | 3222.8 |        |        |        |     |
| A5-a-TS-1 | 2 | -847.212400 | 0.285370 | 0.764090<br>(0.75) | -1087.9 | 46.2   | 55.2   | 103.1  | 108.9  |     |
|           |   |             |          |                    | 146.8   | 195.2  | 212.7  | 235.1  | 284.1  |     |
|           |   |             |          |                    | 306.6   | 309.6  | 310.1  | 400.6  | 408.5  |     |
|           |   |             |          |                    | 424.1   | 430.5  | 449.2  | 456.9  | 510.7  |     |
|           |   |             |          |                    | 526.4   | 529.2  | 537.6  | 550.4  | 567.8  |     |
|           |   |             |          |                    | 574.4   | 581.6  | 604.1  | 655.2  | 673.8  |     |
|           |   |             |          |                    | 714.8   | 718.9  | 738.5  | 756.3  | 761.1  |     |
|           |   |             |          |                    | 777.0   | 779.2  | 798.8  | 798.8  | 813.9  |     |
|           |   |             |          |                    | 828.2   | 872.0  | 881.4  | 883.2  | 901.5  |     |
|           |   |             |          |                    | 903.4   | 960.2  | 960.5  | 979.8  | 981.9  | 0.7 |
|           |   |             |          |                    | 987.0   | 988.4  | 994.8  | 995.4  | 1016.9 | 0.2 |
|           |   |             |          |                    | 1059.0  | 1066.9 | 1115.1 | 1121.9 | 1154.3 | 0.1 |
|           |   |             |          |                    | 1167.5  | 1177.8 | 1180.7 | 1187.7 | 1211.6 |     |
|           |   |             |          |                    | 1225.9  | 1228.4 | 1240.4 | 1261.7 | 1285.7 |     |
|           |   |             |          |                    | 1299.0  | 1321.5 | 1350.2 | 1353.6 | 1362.1 |     |
|           |   |             |          |                    | 1402.4  | 1422.2 | 1431.4 | 1446.1 | 1462.4 |     |
|           |   |             |          |                    | 1482.9  | 1502.0 | 1518.5 | 1536.2 | 1579.0 |     |
|           |   |             |          |                    | 1586.1  | 1624.3 | 1645.9 | 1647.5 | 1655.0 |     |
|           |   |             |          |                    | 1663.0  | 1987.2 | 3157.0 | 3157.7 | 3160.3 |     |
|           |   |             |          |                    | 3160.8  | 3162.6 | 3171.8 | 3171.9 | 3177.1 |     |
|           |   |             |          |                    | 3177.7  | 3187.3 | 3187.5 | 3221.1 | 3221.4 |     |
| A5-a-TS-2 | 1 | -847.216440 | 0.284977 | 0.761025<br>(0.75) | -945.4  | 40.9   | 51.6   | 93.6   | 113.3  |     |
|           |   |             |          |                    | 122.7   | 161.0  | 204.8  | 214.8  | 248.2  |     |
|           |   |             |          |                    | 287.5   | 303.8  | 311.0  | 375.4  | 412.8  |     |
|           |   |             |          |                    | 413.7   | 424.7  | 433.5  | 448.7  | 503.3  |     |
|           |   |             |          |                    | 521.9   | 528.4  | 533.1  | 534.3  | 562.3  |     |
|           |   |             |          |                    | 577.1   | 577.1  | 598.5  | 656.7  | 669.1  |     |
|           |   |             |          |                    | 716.8   | 726.2  | 731.0  | 756.1  | 761.7  |     |
|           |   |             |          |                    | 777.1   | 786.7  | 790.1  | 797.1  | 816.4  | 0.7 |
|           |   |             |          |                    | 829.9   | 868.6  | 876.7  | 882.4  | 891.2  | 0.2 |
|           |   |             |          |                    | 895.6   | 906.0  | 914.3  | 955.7  | 972.2  | 0.1 |
|           |   |             |          |                    | 978.9   | 980.9  | 984.9  | 993.0  | 1016.0 |     |
|           |   |             |          |                    | 1057.7  | 1065.8 | 1107.8 | 1122.0 | 1133.9 |     |
|           |   |             |          |                    | 1167.4  | 1178.8 | 1184.9 | 1193.8 | 1200.3 |     |
|           |   |             |          |                    | 1227.6  | 1239.5 | 1255.8 | 1277.9 | 1290.9 |     |
|           |   |             |          |                    | 1305.6  | 1320.3 | 1340.2 | 1359.9 | 1372.9 |     |
|           |   |             |          |                    | 1408.0  | 1435.3 | 1438.0 | 1449.7 | 1456.7 |     |

|           |   |             |          |                    |        |        |        |        |        |     |
|-----------|---|-------------|----------|--------------------|--------|--------|--------|--------|--------|-----|
|           |   |             |          |                    | 1472.7 | 1500.3 | 1518.5 | 1538.6 | 1559.6 |     |
|           |   |             |          |                    | 1594.9 | 1630.8 | 1641.9 | 1648.8 | 1659.6 |     |
|           |   |             |          |                    | 1664.4 | 2243.2 | 3156.2 | 3157.7 | 3159.3 |     |
|           |   |             |          |                    | 3160.6 | 3161.2 | 3169.7 | 3170.5 | 3177.1 |     |
|           |   |             |          |                    | 3177.8 | 3184.3 | 3185.1 | 3196.2 | 3241.9 |     |
| A5-a-TS-3 | 1 | -847.217244 | 0.284537 | 0.760909<br>(0.75) | -848.6 | 40.0   | 54.1   | 105.5  | 113.1  |     |
|           |   |             |          |                    | 118.6  | 171.6  | 185.9  | 209.5  | 227.9  |     |
|           |   |             |          |                    | 263.2  | 284.0  | 305.0  | 312.5  | 408.6  |     |
|           |   |             |          |                    | 411.3  | 413.6  | 433.7  | 439.6  | 499.3  |     |
|           |   |             |          |                    | 521.2  | 524.5  | 528.3  | 533.2  | 557.8  |     |
|           |   |             |          |                    | 571.2  | 579.9  | 603.2  | 661.1  | 667.9  |     |
|           |   |             |          |                    | 716.8  | 727.9  | 734.5  | 755.5  | 766.0  |     |
|           |   |             |          |                    | 771.7  | 784.6  | 785.2  | 795.2  | 820.1  |     |
|           |   |             |          |                    | 835.9  | 860.8  | 869.5  | 872.3  | 879.2  |     |
|           |   |             |          |                    | 889.5  | 897.7  | 907.5  | 954.4  | 957.0  | 0.6 |
|           |   |             |          |                    | 972.9  | 980.7  | 983.8  | 992.8  | 1006.6 | 0.2 |
|           |   |             |          |                    | 1028.4 | 1062.4 | 1073.7 | 1126.4 | 1132.9 | 0.1 |
|           |   |             |          |                    | 1163.2 | 1176.8 | 1185.1 | 1196.1 | 1218.2 |     |
|           |   |             |          |                    | 1235.4 | 1241.6 | 1254.7 | 1280.8 | 1289.1 |     |
|           |   |             |          |                    | 1299.3 | 1321.5 | 1347.6 | 1359.6 | 1374.2 |     |
|           |   |             |          |                    | 1398.9 | 1426.3 | 1446.3 | 1449.5 | 1456.3 |     |
|           |   |             |          |                    | 1474.4 | 1502.0 | 1506.6 | 1540.6 | 1581.4 |     |
|           |   |             |          |                    | 1596.6 | 1609.0 | 1639.9 | 1650.3 | 1658.2 |     |
|           |   |             |          |                    | 1665.6 | 2384.2 | 3155.6 | 3156.7 | 3158.6 |     |
|           |   |             |          |                    | 3160.6 | 3161.3 | 3170.5 | 3177.7 | 3178.4 |     |
|           |   |             |          |                    | 3179.4 | 3180.7 | 3185.3 | 3195.6 | 3221.1 |     |
| A5-a-P-1  | 2 | -846.061463 | 0.273859 | 0.760209<br>(0.75) | 48.4   | 55.7   | 106.0  | 112.8  | 143.6  |     |
|           |   |             |          |                    | 192.2  | 213.0  | 221.4  | 293.7  | 304.9  |     |
|           |   |             |          |                    | 306.6  | 401.9  | 417.8  | 423.4  | 427.7  |     |
|           |   |             |          |                    | 448.3  | 503.7  | 525.4  | 528.1  | 532.3  |     |
|           |   |             |          |                    | 545.7  | 555.1  | 571.7  | 579.1  | 603.1  |     |
|           |   |             |          |                    | 661.5  | 669.0  | 706.6  | 728.3  | 742.1  |     |
|           |   |             |          |                    | 757.0  | 761.4  | 776.2  | 782.2  | 792.6  |     |
|           |   |             |          |                    | 794.2  | 812.7  | 827.5  | 875.6  | 881.6  |     |
|           |   |             |          |                    | 883.8  | 897.6  | 902.6  | 959.2  | 960.9  |     |
|           |   |             |          |                    | 979.0  | 981.1  | 985.2  | 993.9  | 994.8  | 0.7 |
|           |   |             |          |                    | 1016.6 | 1056.1 | 1058.2 | 1122.1 | 1131.4 | 0.2 |
|           |   |             |          |                    | 1164.2 | 1174.2 | 1174.4 | 1183.0 | 1202.4 | 0.1 |
|           |   |             |          |                    | 1227.9 | 1229.0 | 1241.0 | 1265.5 | 1286.4 |     |
|           |   |             |          |                    | 1297.0 | 1320.2 | 1352.0 | 1355.5 | 1359.7 |     |
|           |   |             |          |                    | 1416.9 | 1421.3 | 1421.5 | 1447.9 | 1464.1 |     |
|           |   |             |          |                    | 1481.5 | 1498.7 | 1522.8 | 1534.4 | 1578.9 |     |
|           |   |             |          |                    | 1584.9 | 1626.6 | 1643.1 | 1647.5 | 1656.8 |     |
|           |   |             |          |                    | 1659.4 | 3156.4 | 3156.8 | 3159.7 | 3159.8 |     |
|           |   |             |          |                    | 3163.4 | 3167.2 | 3167.6 | 3175.8 | 3176.4 |     |
|           |   |             |          |                    | 3178.3 | 3178.7 | 3189.7 | 3189.9 |        |     |
| A5-a-P-2  | 1 | -846.059146 | 0.273752 | 0.758203<br>(0.75) | 46.0   | 57.4   | 110.3  | 110.9  | 135.1  |     |
|           |   |             |          |                    | 190.0  | 212.3  | 238.8  | 288.5  | 305.4  |     |
|           |   |             |          |                    | 310.6  | 406.0  | 414.4  | 425.2  | 432.0  |     |
|           |   |             |          |                    | 448.8  | 504.0  | 516.7  | 524.7  | 533.3  |     |
|           |   |             |          |                    | 533.3  | 561.8  | 576.2  | 576.8  | 603.4  |     |
|           |   |             |          |                    | 662.4  | 664.8  | 714.2  | 728.0  | 736.0  |     |
|           |   |             |          |                    | 746.2  | 756.9  | 774.1  | 787.1  | 791.3  |     |
|           |   |             |          |                    | 797.0  | 814.4  | 828.1  | 873.7  | 878.9  |     |
|           |   |             |          |                    | 888.2  | 892.9  | 902.7  | 906.1  | 956.1  |     |
|           |   |             |          |                    | 966.5  | 978.1  | 980.4  | 983.1  | 992.8  |     |
|           |   |             |          |                    | 1016.1 | 1060.9 | 1066.7 | 1113.1 | 1129.3 | 0.7 |
|           |   |             |          |                    | 1166.3 | 1177.3 | 1182.4 | 1189.3 | 1195.8 | 0.2 |
|           |   |             |          |                    | 1228.3 | 1239.9 | 1256.1 | 1273.2 | 1290.0 | 0.1 |
|           |   |             |          |                    | 1297.5 | 1317.8 | 1337.8 | 1359.1 | 1371.6 |     |
|           |   |             |          |                    | 1409.6 | 1434.4 | 1438.7 | 1444.9 | 1455.6 |     |
|           |   |             |          |                    | 1469.8 | 1496.2 | 1515.7 | 1534.0 | 1557.5 |     |
|           |   |             |          |                    | 1593.8 | 1628.9 | 1641.5 | 1646.9 | 1659.1 |     |
|           |   |             |          |                    | 1662.7 | 3156.0 | 3157.3 | 3159.0 | 3159.9 |     |
|           |   |             |          |                    | 3160.6 | 3170.1 | 3170.1 | 3176.5 | 3177.3 |     |
|           |   |             |          |                    | 3182.8 | 3183.1 | 3189.1 | 3202.1 |        |     |
| A5-a-P-3  | 1 | -846.055973 | 0.273650 | 0.757829<br>(0.75) | 42.1   | 54.3   | 106.0  | 116.8  | 128.3  |     |
|           |   |             |          |                    | 184.9  | 217.8  | 253.2  | 282.6  | 304.7  |     |
|           |   |             |          |                    | 311.7  | 406.9  | 410.1  | 413.6  | 433.3  | 0.7 |
|           |   |             |          |                    | 438.7  | 502.3  | 518.5  | 528.2  | 530.3  | 0.2 |
|           |   |             |          |                    | 534.3  | 555.6  | 570.6  | 579.0  | 601.6  | 0.1 |
|           |   |             |          |                    | 658.5  | 664.8  | 714.6  | 728.6  | 732.9  |     |
|           |   |             |          |                    | 755.5  | 763.2  | 772.3  | 782.6  | 785.5  |     |



|           |   |             |          |                    |        |        |        |        |        |     |
|-----------|---|-------------|----------|--------------------|--------|--------|--------|--------|--------|-----|
|           |   |             |          |                    | 794.2  | 819.3  | 834.5  | 855.6  | 871.1  |     |
|           |   |             |          |                    | 873.4  | 880.0  | 891.4  | 907.3  | 952.4  |     |
|           |   |             |          |                    | 954.3  | 975.9  | 980.3  | 982.6  | 992.6  |     |
|           |   |             |          |                    | 1012.1 | 1062.5 | 1072.2 | 1123.2 | 1130.6 |     |
|           |   |             |          |                    | 1161.2 | 1176.0 | 1184.7 | 1195.8 | 1215.7 |     |
|           |   |             |          |                    | 1234.1 | 1239.7 | 1254.1 | 1274.6 | 1288.8 |     |
|           |   |             |          |                    | 1296.0 | 1320.6 | 1341.1 | 1357.9 | 1373.6 |     |
|           |   |             |          |                    | 1394.6 | 1425.1 | 1442.2 | 1449.8 | 1455.7 |     |
|           |   |             |          |                    | 1473.6 | 1497.3 | 1505.0 | 1539.2 | 1578.1 |     |
|           |   |             |          |                    | 1595.4 | 1607.0 | 1639.6 | 1649.8 | 1657.9 |     |
|           |   |             |          |                    | 1665.1 | 3154.6 | 3156.5 | 3158.6 | 3160.6 |     |
|           |   |             |          |                    | 3161.3 | 3170.3 | 3177.6 | 3178.7 | 3180.0 |     |
|           |   |             |          |                    | 3182.0 | 3185.1 | 3195.1 | 3220.6 |        |     |
| A2R5      | 2 | -462.037053 | 0.158745 | 0                  | 160.5  | 212.2  | 229.3  | 375.6  | 423.1  |     |
|           |   |             |          |                    | 461.5  | 470.8  | 518.9  | 561.4  | 583.1  |     |
|           |   |             |          |                    | 615.7  | 668.6  | 675.1  | 695.8  | 741.2  |     |
|           |   |             |          |                    | 767.0  | 788.4  | 818.0  | 848.5  | 879.5  | 1.5 |
|           |   |             |          |                    | 917.6  | 929.4  | 935.4  | 975.8  | 985.6  | 1.2 |
|           |   |             |          |                    | 1027.5 | 1034.8 | 1056.5 | 1102.6 | 1113.1 | 0.7 |
|           |   |             |          |                    | 1176.1 | 1203.3 | 1224.5 | 1246.4 | 1273.1 |     |
|           |   |             |          |                    | 1331.5 | 1385.5 | 1419.5 | 1447.3 | 1457.4 |     |
|           |   |             |          |                    | 1489.7 | 1515.5 | 1540.4 | 1636.4 | 1652.4 |     |
|           |   |             |          |                    | 1660.6 | 3159.6 | 3160.0 | 3169.0 | 3169.7 |     |
|           |   |             |          |                    | 3183.1 | 3184.0 | 3201.8 | 3221.9 |        |     |
| A2R5-TS-1 | 1 | -462.516676 | 0.157075 | 0.766166<br>(0.75) | -731.9 | 128.9  | 160.6  | 180.3  | 213.3  |     |
|           |   |             |          |                    | 244.2  | 368.0  | 422.3  | 458.3  | 489.7  |     |
|           |   |             |          |                    | 515.7  | 554.2  | 562.8  | 619.1  | 650.5  |     |
|           |   |             |          |                    | 665.2  | 684.2  | 760.7  | 772.4  | 799.5  |     |
|           |   |             |          |                    | 814.1  | 839.3  | 849.0  | 860.9  | 922.7  | 1.4 |
|           |   |             |          |                    | 929.8  | 952.0  | 977.3  | 987.6  | 1015.1 | 1.2 |
|           |   |             |          |                    | 1032.4 | 1057.3 | 1092.8 | 1169.8 | 1198.3 | 0.7 |
|           |   |             |          |                    | 1207.9 | 1239.7 | 1257.7 | 1266.5 | 1376.7 |     |
|           |   |             |          |                    | 1403.0 | 1447.4 | 1451.2 | 1473.5 | 1512.0 |     |
|           |   |             |          |                    | 1517.9 | 1630.7 | 1645.0 | 1655.9 | 2652.9 |     |
|           |   |             |          |                    | 3161.5 | 3163.4 | 3171.9 | 3174.8 | 3184.7 |     |
|           |   |             |          |                    | 3187.4 | 3218.2 |        |        |        |     |
| A2R5-TS-2 | 1 | -462.521830 | 0.156654 | 0.761780<br>(0.75) | -886.6 | 131.5  | 190.5  | 220.6  | 221.1  |     |
|           |   |             |          |                    | 230.1  | 377.8  | 427.8  | 463.7  | 477.2  |     |
|           |   |             |          |                    | 513.5  | 554.2  | 573.3  | 610.5  | 670.0  |     |
|           |   |             |          |                    | 671.0  | 689.8  | 736.5  | 765.4  | 792.0  |     |
|           |   |             |          |                    | 792.9  | 841.0  | 871.5  | 917.3  | 924.4  | 1.5 |
|           |   |             |          |                    | 935.2  | 958.4  | 983.1  | 1016.0 | 1025.8 | 1.2 |
|           |   |             |          |                    | 1045.1 | 1080.4 | 1104.5 | 1132.8 | 1170.9 | 0.7 |
|           |   |             |          |                    | 1202.9 | 1238.1 | 1255.1 | 1320.2 | 1343.2 |     |
|           |   |             |          |                    | 1401.3 | 1437.4 | 1445.4 | 1479.6 | 1497.0 |     |
|           |   |             |          |                    | 1535.6 | 1608.0 | 1633.8 | 1651.7 | 2306.4 |     |
|           |   |             |          |                    | 3160.5 | 3161.5 | 3170.3 | 3176.8 | 3185.3 |     |
|           |   |             |          |                    | 3208.5 | 3229.4 |        |        |        |     |
| A2R5-TS-3 | 1 | -462.522164 | 0.156566 | 0.761056<br>(0.75) | -855.7 | 137.9  | 187.7  | 222.3  | 226.1  |     |
|           |   |             |          |                    | 233.8  | 370.0  | 424.3  | 463.6  | 471.1  |     |
|           |   |             |          |                    | 512.2  | 557.4  | 565.5  | 607.0  | 662.3  |     |
|           |   |             |          |                    | 669.5  | 690.9  | 735.7  | 773.8  | 793.2  |     |
|           |   |             |          |                    | 816.9  | 853.9  | 869.7  | 892.9  | 906.6  | 1.5 |
|           |   |             |          |                    | 924.3  | 938.3  | 982.4  | 1018.7 | 1030.0 | 1.2 |
|           |   |             |          |                    | 1049.8 | 1055.5 | 1098.8 | 1106.6 | 1187.4 | 0.7 |
|           |   |             |          |                    | 1214.3 | 1216.9 | 1259.2 | 1326.6 | 1357.2 |     |
|           |   |             |          |                    | 1397.9 | 1408.1 | 1454.3 | 1471.6 | 1502.1 |     |
|           |   |             |          |                    | 1538.0 | 1601.1 | 1643.4 | 1651.2 | 2369.0 |     |
|           |   |             |          |                    | 3161.4 | 3162.6 | 3167.2 | 3172.1 | 3184.6 |     |
|           |   |             |          |                    | 3205.1 | 3225.1 |        |        |        |     |
| A2R5-TS-4 | 1 | -462.521153 | 0.156757 | 0.763041<br>(0.75) | -851.7 | 147.5  | 158.9  | 216.8  | 219.3  |     |
|           |   |             |          |                    | 251.7  | 381.4  | 436.5  | 453.7  | 470.2  |     |
|           |   |             |          |                    | 508.8  | 557.8  | 568.0  | 611.2  | 670.8  |     |
|           |   |             |          |                    | 672.0  | 684.9  | 736.3  | 780.6  | 806.9  |     |
|           |   |             |          |                    | 809.7  | 841.1  | 862.6  | 892.4  | 924.4  | 1.4 |
|           |   |             |          |                    | 934.8  | 949.2  | 984.3  | 1011.6 | 1018.7 | 1.2 |
|           |   |             |          |                    | 1038.9 | 1069.0 | 1101.9 | 1122.7 | 1189.2 | 0.7 |
|           |   |             |          |                    | 1216.4 | 1221.8 | 1261.1 | 1326.7 | 1365.2 |     |
|           |   |             |          |                    | 1388.8 | 1415.2 | 1447.0 | 1482.0 | 1493.3 |     |
|           |   |             |          |                    | 1537.6 | 1615.2 | 1636.1 | 1652.9 | 2373.5 |     |
|           |   |             |          |                    | 3158.7 | 3164.0 | 3173.5 | 3176.6 | 3190.6 |     |
|           |   |             |          |                    | 3204.4 | 3224.2 |        |        |        |     |
| A2R5-P-1  | 1 | -461.353890 | 0.146077 | 0.764581           | 158.1  | 211.9  | 234.8  | 366.1  | 422.2  | 1.6 |

|          |   |             |          |                    |                                                                                                       |                                                                                             |                                                                                             |                                                                                             |                                                                                              |                   |
|----------|---|-------------|----------|--------------------|-------------------------------------------------------------------------------------------------------|---------------------------------------------------------------------------------------------|---------------------------------------------------------------------------------------------|---------------------------------------------------------------------------------------------|----------------------------------------------------------------------------------------------|-------------------|
|          |   |             |          | (0.75)             | 455.7<br>618.2<br>770.4<br>920.9<br>1031.6<br>1205.6<br>1401.5<br>1520.5<br>3164.0<br>3223.1          | 485.1<br>642.6<br>796.9<br>928.9<br>1056.2<br>1235.8<br>1447.5<br>1630.0<br>3171.9          | 516.2<br>671.1<br>813.0<br>976.4<br>1090.2<br>1252.6<br>1448.9<br>1643.6<br>3176.2          | 552.7<br>688.3<br>840.1<br>986.8<br>1167.6<br>1263.5<br>1471.5<br>1655.0<br>3184.3          | 554.1<br>754.2<br>872.7<br>1012.2<br>1194.6<br>1373.4<br>1512.8<br>3161.1<br>3188.3          | 1.2<br>0.7        |
| A2R5-P-2 | 1 | -461.361025 | 0.145909 | 0.759038<br>(0.75) | 162.2<br>463.9<br>608.3<br>760.5<br>922.7<br>1042.5<br>1201.5<br>1396.3<br>1533.7<br>3161.1<br>3230.7 | 215.5<br>472.0<br>667.5<br>788.0<br>934.7<br>1078.3<br>1235.3<br>1433.3<br>1604.9<br>3170.3 | 223.3<br>517.9<br>669.7<br>806.8<br>954.0<br>1103.4<br>1253.8<br>1441.4<br>1630.9<br>3176.7 | 376.3<br>556.2<br>691.9<br>836.4<br>981.9<br>1126.5<br>1308.7<br>1480.2<br>1649.0<br>3184.6 | 427.3<br>571.7<br>733.6<br>872.6<br>1019.3<br>1166.5<br>1339.7<br>1493.6<br>3160.1<br>3209.5 | 1.5<br>1.3<br>0.7 |
| A2R5-P-3 | 1 | -461.361018 | 0.145662 | 0.758066<br>(0.75) | 163.0<br>463.8<br>602.9<br>771.1<br>884.7<br>1036.3<br>1205.6<br>1391.0<br>1537.3<br>3164.0<br>3225.0 | 216.4<br>471.1<br>665.9<br>800.8<br>922.7<br>1050.1<br>1214.9<br>1410.4<br>1591.0<br>3168.2 | 227.4<br>516.7<br>667.9<br>811.0<br>937.2<br>1098.5<br>1258.8<br>1454.4<br>1641.8<br>3171.6 | 368.7<br>558.9<br>690.6<br>854.2<br>981.8<br>1105.9<br>1321.1<br>1466.6<br>1650.4<br>3184.0 | 422.4<br>560.0<br>732.0<br>871.8<br>1027.2<br>1185.9<br>1348.5<br>1501.7<br>3160.9<br>3204.8 | 1.5<br>1.3<br>0.7 |
| A2R5-P-4 | 1 | -461.360000 | 0.145873 | 0.760817<br>(0.75) | 156.6<br>448.7<br>609.0<br>779.4<br>923.5<br>1032.6<br>1210.1<br>1376.5<br>1536.3<br>3163.7<br>3223.7 | 212.5<br>471.3<br>670.9<br>797.9<br>932.7<br>1060.3<br>1218.4<br>1414.8<br>1606.3<br>3173.4 | 236.5<br>508.5<br>674.2<br>808.4<br>944.3<br>1100.4<br>1259.4<br>1444.3<br>1634.8<br>3176.9 | 381.4<br>559.1<br>690.5<br>834.1<br>984.4<br>1119.1<br>1326.5<br>1479.1<br>1651.7<br>3191.9 | 428.4<br>564.5<br>733.5<br>867.9<br>1015.8<br>1187.5<br>1356.7<br>1490.2<br>3158.9<br>3203.8 | 1.6<br>1.2<br>0.7 |

**Table S6.** Cartesian coordinates of optimized structures at B3LYP/6-311G(d,p) level for all species in this work.

| Species Name | Geometry (Å) |           |           | Species Name | Geometry (Å) |   |           |           |           |
|--------------|--------------|-----------|-----------|--------------|--------------|---|-----------|-----------|-----------|
| H            | H            | 0.000000  | 0.000000  | 0.000000     | H2           | H | 0.000000  | 0.000000  | 0.372063  |
|              |              |           |           |              |              | H | 0.000000  | 0.000000  | -0.372063 |
| A1           | C            | -0.560604 | 1.275909  | 0.000000     | A1-TS        | C | -1.479586 | 0.000001  | -0.000002 |
|              | C            | -1.385360 | 0.152438  | -0.000024    |              | C | -0.787696 | -1.210891 | -0.000001 |
|              | C            | -0.824752 | -1.123457 | 0.000017     |              | C | 0.611599  | -1.219542 | 0.000000  |
|              | C            | 0.560655  | -1.275887 | -0.000004    |              | C | 1.255910  | -0.000001 | 0.000001  |
|              | C            | 1.385354  | -0.152493 | -0.000015    |              | C | 0.611600  | 1.219542  | 0.000001  |
|              | C            | 0.824707  | 1.123489  | 0.000019     |              | C | -0.787695 | 1.210892  | -0.000001 |
|              | H            | -0.996827 | 2.268652  | 0.000002     |              | H | -2.563677 | 0.000001  | -0.000003 |
|              | H            | -2.463188 | 0.271274  | -0.000013    |              | H | -1.332091 | -2.149302 | -0.000002 |
|              | H            | -1.466376 | -1.997609 | 0.000019     |              | H | 1.162556  | -2.153779 | 0.000001  |
|              | H            | 0.996752  | -2.268686 | 0.000008     |              | H | 2.754443  | -0.000001 | 0.000004  |
|              | H            | 2.463197  | -0.271195 | -0.000011    |              | H | 1.162558  | 2.153778  | 0.000002  |
|              | H            | 1.466439  | 1.997562  | 0.000032     |              | H | -1.332089 | 2.149303  | -0.000001 |
|              |              |           |           |              |              | H | 3.603501  | 0.000000  | 0.000006  |
| A1-P         | C            | 0.000003  | 1.321868  | 0.000000     | A2           | C | 2.429422  | 0.707398  | 0.000002  |
|              | C            | -1.211527 | 0.631299  | -0.000008    |              | C | 1.243505  | 1.400219  | -0.000003 |
|              | C            | -1.223490 | -0.770372 | 0.000019     |              | C | 0.000014  | 0.715613  | 0.000000  |
|              | C            | 0.000005  | -1.396249 | 0.000001     |              | C | -0.000016 | -0.715608 | -0.000001 |
|              | C            | 1.223487  | -0.770377 | -0.000020    |              | C | 1.243484  | -1.400222 | -0.000003 |
|              | C            | 1.211522  | 0.631310  | 0.000006     |              | C | 2.429406  | -0.707419 | 0.000002  |
|              | H            | -0.000010 | 2.405807  | 0.000001     |              | H | -1.241815 | 2.485397  | -0.000006 |
|              | H            | -2.149897 | 1.175978  | -0.000009    |              | H | 3.372260  | 1.242768  | 0.000004  |
|              | H            | -2.157261 | -1.321324 | 0.000020     |              | H | 1.241851  | 2.485384  | -0.000001 |
|              | H            | 2.157273  | -1.321305 | -0.000016    |              | C | -1.243489 | 1.400230  | 0.000000  |

|         |                                                                                                                                                                                                                                                                                                                                                                                                                                                                                                                                                                                                                                                                                                                                                                                                                                  |         |                                                                                                                                                                                                                                                                                                                                                                                                                                                                                                                                                                                                                                                                                                                                                                                                                                                                |
|---------|----------------------------------------------------------------------------------------------------------------------------------------------------------------------------------------------------------------------------------------------------------------------------------------------------------------------------------------------------------------------------------------------------------------------------------------------------------------------------------------------------------------------------------------------------------------------------------------------------------------------------------------------------------------------------------------------------------------------------------------------------------------------------------------------------------------------------------|---------|----------------------------------------------------------------------------------------------------------------------------------------------------------------------------------------------------------------------------------------------------------------------------------------------------------------------------------------------------------------------------------------------------------------------------------------------------------------------------------------------------------------------------------------------------------------------------------------------------------------------------------------------------------------------------------------------------------------------------------------------------------------------------------------------------------------------------------------------------------------|
|         | H 2.149902 1.175970 0.000010                                                                                                                                                                                                                                                                                                                                                                                                                                                                                                                                                                                                                                                                                                                                                                                                     |         | C -1.243508 -1.400225 0.000000<br>H 1.241821 -2.485390 0.000000<br>H 3.372240 -1.242795 0.000005<br>C -2.429417 -0.707402 0.000000<br>C -2.429402 0.707416 0.000003<br>H -1.241838 -2.485389 -0.000004<br>H -3.372268 -1.242753 0.000002<br>H -3.372241 1.242785 0.000002                                                                                                                                                                                                                                                                                                                                                                                                                                                                                                                                                                                      |
| A2-TS-1 | C -2.425779 0.750079 0.000028<br>C -1.216459 1.401006 0.000181<br>C -0.002877 0.665406 0.000108<br>C -0.051918 -0.771607 -0.000129<br>C -1.322280 -1.403905 -0.000280<br>C -2.479275 -0.663506 -0.000205<br>H 1.376916 2.744651 0.000505<br>H -3.347937 1.320065 0.000085<br>H -1.171153 2.483770 0.000357<br>C 1.277217 1.246597 0.000253<br>C 1.166360 -1.502505 -0.000200<br>H -1.364574 -2.488292 -0.000457<br>H -3.442128 -1.161792 -0.000323<br>C 2.382837 -0.864341 -0.000049<br>C 2.447878 0.555441 0.000187<br>H 1.120276 -2.586399 -0.000377<br>H 3.302596 -1.439201 -0.000106<br>H 3.407594 1.061055 0.000307<br>H 1.464185 3.590153 0.000646                                                                                                                                                                         | A2-P-1  | C -2.394156 0.728899 0.000019<br>C -1.190969 1.391503 0.000195<br>C 0.035536 0.677138 0.000124<br>C -0.014529 -0.761272 -0.000138<br>C -1.273595 -1.416546 -0.000312<br>C -2.436064 -0.685616 -0.000236<br>H 1.330165 2.406984 0.000489<br>H -3.321788 1.290018 0.000077<br>H -1.161568 2.476282 0.000387<br>C 1.301882 1.322702 0.000295<br>C 1.226562 -1.408644 -0.000194<br>H -1.296076 -2.499809 -0.000509<br>H -3.394889 -1.191376 -0.000371<br>C 2.446428 -0.820580 -0.000029<br>C 2.473049 0.604393 0.000221<br>H 3.369470 -1.389592 -0.000093<br>H 3.429824 1.115633 0.000354                                                                                                                                                                                                                                                                          |
| A2-TS-2 | C 2.456667 -0.813656 0.000030<br>C 1.236635 -1.445175 0.000185<br>C 0.031960 -0.695858 0.000113<br>C 0.104012 0.735039 -0.000124<br>C 1.382417 1.352485 -0.000279<br>C 2.530530 0.598651 -0.000204<br>H -1.322261 -2.401571 0.000445<br>H 3.370176 -1.397682 0.000086<br>H 1.178530 -2.528543 0.000363<br>C -1.251387 -1.318331 0.000268<br>C -1.097320 1.493785 -0.000197<br>H 1.438269 2.436080 -0.000456<br>H 3.499815 1.084192 -0.000325<br>C -2.328411 0.875098 -0.000045<br>C -2.354324 -0.524435 0.000184<br>H -1.031979 2.577431 -0.000375<br>H -3.245352 1.453830 -0.000101<br>H -3.696758 -1.194512 0.000344<br>H -4.455106 -1.574852 0.000433                                                                                                                                                                         | A2-P-2  | C 2.341936 -0.789945 0.000000<br>C 1.125068 -1.426615 0.000001<br>C -0.086688 -0.686652 0.000000<br>C -0.017508 0.744692 -0.000001<br>C 1.255138 1.371753 0.000001<br>C 2.406806 0.622818 -0.000001<br>H -1.395072 -2.412161 0.000002<br>H 3.258819 -1.368278 0.000000<br>H 1.073581 -2.510409 0.000001<br>C -1.355613 -1.327125 0.000000<br>C -1.235611 1.493112 0.000001<br>H 1.303819 2.455522 0.000000<br>H 3.373426 1.114005 -0.000001<br>C -2.395684 0.795275 0.000001<br>C -2.524432 -0.593525 -0.000002<br>H -1.201596 2.577825 0.000001<br>H -3.493451 -1.079237 0.000000                                                                                                                                                                                                                                                                             |
| A3      | C 3.654601 0.712031 0.000029<br>C 3.654601 -0.712031 0.000005<br>C 1.221845 0.721546 0.000018<br>C 0.000002 1.401456 0.000024<br>C -1.221848 0.721545 0.000006<br>C -1.221848 -0.721545 -0.000018<br>C 0.000002 -1.401456 -0.000024<br>C 1.221845 -0.721546 -0.000006<br>C -2.476556 1.404877 0.000012<br>C -2.476555 -1.404877 -0.000036<br>C -3.654602 -0.712028 -0.000029<br>C -3.654602 0.712028 -0.000005<br>H -2.475917 2.489905 0.000030<br>H -0.000002 2.487340 0.000042<br>H -0.000002 -2.487340 -0.000042<br>H -2.475917 -2.489905 -0.000054<br>C 2.476558 -1.404878 -0.000012<br>C 2.476558 1.404878 0.000036<br>H 2.475915 -2.489907 -0.000030<br>H 2.475915 2.489907 0.000054<br>H -4.599200 -1.244481 -0.000043<br>H -4.599200 1.244481 -0.000001<br>H 4.599202 -1.244477 0.000001<br>H 4.599203 1.244477 0.000043 | A3-TS-1 | C 3.658011 -0.754447 -0.000030<br>C 3.661757 0.669914 -0.000006<br>C 1.224827 -0.764638 -0.000019<br>C 0.000000 -1.440523 -0.000024<br>C -1.224827 -0.764638 -0.000007<br>C -1.233240 0.685702 0.000017<br>C 0.000000 1.316595 0.000022<br>C 1.233240 0.685702 0.000006<br>C -2.479742 -1.446641 -0.000012<br>C -2.488033 1.369354 0.000035<br>C -3.661757 0.669914 0.000029<br>C -3.658011 -0.754447 0.000005<br>H -2.478160 -2.531772 -0.000030<br>H 0.000000 -2.526084 -0.000042<br>H 0.000000 2.822711 0.000049<br>H -2.488311 2.452888 0.000053<br>C 2.488033 1.369354 0.000011<br>C 2.479742 -1.446641 -0.000036<br>H 2.488311 2.452888 0.000029<br>H 2.478160 -2.531772 -0.000054<br>H 0.000000 3.672688 0.000064<br>H 4.608201 1.198549 -0.000002<br>H 4.601726 -1.288001 -0.000043<br>H -4.608201 1.198549 0.000042<br>H -4.601726 -1.288001 0.000001 |
| A3-TS-2 | C 3.697652 -0.678012 -0.000030<br>C 3.670642 0.746238 -0.000006                                                                                                                                                                                                                                                                                                                                                                                                                                                                                                                                                                                                                                                                                                                                                                  | A3-TS-3 | C -3.728875 0.656719 -0.000031<br>C -3.701336 -0.767357 -0.000006                                                                                                                                                                                                                                                                                                                                                                                                                                                                                                                                                                                                                                                                                                                                                                                              |

|           |                                                                                                                                                                                                                                                                                                                                                                                                                                                                                                                                                                                                                                                                                                                                                                                               |           |                                                                                                                                                                                                                                                                                                                                                                                                                                                                                                                                                                                                                                                                                                                                                                                                                                     |
|-----------|-----------------------------------------------------------------------------------------------------------------------------------------------------------------------------------------------------------------------------------------------------------------------------------------------------------------------------------------------------------------------------------------------------------------------------------------------------------------------------------------------------------------------------------------------------------------------------------------------------------------------------------------------------------------------------------------------------------------------------------------------------------------------------------------------|-----------|-------------------------------------------------------------------------------------------------------------------------------------------------------------------------------------------------------------------------------------------------------------------------------------------------------------------------------------------------------------------------------------------------------------------------------------------------------------------------------------------------------------------------------------------------------------------------------------------------------------------------------------------------------------------------------------------------------------------------------------------------------------------------------------------------------------------------------------|
|           | C 1.265966 -0.733934 -0.000019<br>C 0.058536 -1.440057 -0.000024<br>C -1.177725 -0.788248 -0.000007<br>C -1.199588 0.661547 0.000017<br>C 0.005924 1.368756 0.000023<br>C 1.238698 0.708594 0.000005<br>C -2.421192 -1.494519 -0.000013<br>C -2.478980 1.265719 0.000034<br>C -3.655571 0.597458 0.000029<br>C -3.617481 -0.833551 0.000004<br>H -2.396394 -2.579033 -0.000031<br>H 0.081906 -2.525755 -0.000042<br>H -0.017581 2.452949 0.000040<br>H -2.551954 2.764591 0.000060<br>C 2.479721 1.416281 0.000011<br>C 2.533263 -1.393286 -0.000036<br>H 2.457303 2.500945 0.000029<br>H 2.553043 -2.478079 -0.000054<br>H -4.607319 1.117873 0.000042<br>H -4.550043 -1.387146 0.000000<br>H 4.605027 1.295922 -0.000002<br>H 4.652338 -1.191682 -0.000043<br>H -2.625519 3.611504 0.000075 |           | C -1.297163 0.711873 -0.000019<br>C -0.088892 1.415774 -0.000024<br>C 1.146778 0.760940 -0.000007<br>C 1.172093 -0.683437 0.000018<br>C -0.034636 -1.387878 0.000023<br>C -1.269359 -0.730336 0.000006<br>C 2.383282 1.479799 -0.000013<br>C 2.446681 -1.344965 0.000035<br>C 3.566447 -0.586914 0.000028<br>C 3.585790 0.822205 0.000005<br>H 2.353055 2.564890 -0.000031<br>H -0.110847 2.501296 -0.000043<br>H -0.013495 -2.473316 0.000042<br>H 2.483683 -2.429850 0.000054<br>C -2.510443 -1.437796 0.000011<br>C -2.564334 1.371721 -0.000037<br>H -2.488859 -2.522545 0.000030<br>H -2.583811 2.456547 -0.000055<br>H 4.887399 -1.297405 0.000047<br>H 4.522936 1.367387 0.000001<br>H -4.635691 -1.317275 -0.000002<br>H -4.683640 1.170297 -0.000044<br>H 5.633075 -1.702107 0.000057                                      |
| A3-P-1    | C 3.660137 0.680374 0.000029<br>C 3.663744 -0.743896 0.000005<br>C 1.226072 0.697721 0.000018<br>C 0.000002 1.372919 0.000023<br>C -1.226076 0.697719 0.000006<br>C -1.237197 -0.755264 -0.000019<br>C 0.000002 -1.364381 -0.000023<br>C 1.237193 -0.755265 -0.000007<br>C -2.483125 1.375654 0.000011<br>C -2.489449 -1.442886 -0.000036<br>C -3.663746 -0.743893 -0.000030<br>C -3.660139 0.680371 -0.000006<br>H -2.485213 2.460839 0.000030<br>H -0.000002 2.458292 0.000041<br>H -2.484270 -2.526326 -0.000054<br>C 2.489453 -1.442888 -0.000012<br>C 2.483129 1.375657 0.000035<br>H 2.484267 -2.526328 -0.000031<br>H 2.485211 2.460841 0.000053<br>H -4.609935 -1.273111 -0.000044<br>H -4.604193 1.213629 -0.000001<br>H 4.609937 -1.273108 0.000001<br>H 4.604196 1.213624 0.000042 | A3-P-2    | C 3.618544 0.738901 0.000029<br>C 3.643124 -0.685066 0.000005<br>C 1.186103 0.707154 0.000017<br>C -0.045585 1.370692 0.000023<br>C -1.258457 0.676703 0.000006<br>C -1.225589 -0.775197 -0.000019<br>C 0.003351 -1.440393 -0.000024<br>C 1.211193 -0.735662 -0.000007<br>C -2.528637 1.335157 0.000011<br>C -2.484706 -1.406818 -0.000035<br>C -3.690016 -0.804375 -0.000030<br>C -3.700311 0.631243 -0.000006<br>H -2.545053 2.419720 0.000030<br>H -0.059971 2.456591 0.000041<br>H 0.014817 -2.524686 -0.000043<br>C 2.477151 -1.397783 -0.000012<br>C 2.428933 1.411600 0.000035<br>H 2.494020 -2.482544 -0.000031<br>H 2.409550 2.496396 0.000053<br>H -4.621794 -1.359122 -0.000044<br>H -4.652749 1.150396 -0.000001<br>H 4.596707 -1.200852 0.000000<br>H 4.553875 1.287168 0.000042                                       |
| A3-P-3    | C -3.589801 -0.757020 0.000029<br>C -3.614900 0.666568 0.000005<br>C -1.157749 -0.721420 0.000017<br>C 0.076053 -1.379371 0.000023<br>C 1.286999 -0.679819 0.000006<br>C 1.258437 0.765623 -0.000019<br>C 0.026243 1.424064 -0.000024<br>C -1.183130 0.720867 -0.000007<br>C 2.547475 -1.356283 0.000012<br>C 2.510236 1.475426 -0.000036<br>C 3.640815 0.742599 -0.000029<br>C 3.729684 -0.658165 -0.000005<br>H 2.555653 -2.441939 0.000030<br>H 0.094347 -2.464988 0.000041<br>H 0.006791 2.509503 -0.000042<br>H 2.511209 2.560777 -0.000054<br>C -2.449801 1.381203 -0.000013<br>C -2.399234 -1.428030 0.000035<br>H -2.469403 2.465990 -0.000031<br>H -2.378558 -2.512853 0.000053<br>H 4.685415 -1.169606 -0.000001<br>H -4.568844 1.182076 0.000000<br>H -4.524562 -1.306415 0.000042 | A3-p      | C -3.555755 -0.296446 0.000046<br>C -2.833856 0.877021 0.000045<br>C -1.421157 0.865035 0.000005<br>C -0.728221 -0.379583 -0.000034<br>C -1.498252 -1.564282 -0.000041<br>C -2.877871 -1.527262 0.000000<br>C -0.678184 2.091367 -0.000005<br>C 0.728222 -0.379603 -0.000075<br>C 1.421185 0.864958 -0.000094<br>C 0.678251 2.091317 -0.000054<br>H -1.228829 3.026266 0.000022<br>H -3.345107 1.834160 0.000073<br>H -1.005697 -2.527978 -0.000083<br>H 1.228909 3.026214 -0.000066<br>C 2.833867 0.876987 -0.000152<br>C 1.498142 -1.564313 -0.000141<br>H 1.005606 -2.528001 -0.000833<br>C 3.555757 -0.296485 0.000227<br>C 2.877879 -1.527268 0.000298<br>H 3.345165 1.834083 -0.000513<br>H 4.639572 -0.272621 0.000546<br>H 3.440557 -2.454056 0.000632<br>H -4.639557 -0.272746 0.000075<br>H -3.440659 -2.453964 -0.000006 |
| A3-p-TS-1 | C 3.532452 -0.429416 0.000040<br>C 2.845913 0.765171 0.000037<br>C 1.433981 0.785078 0.000021                                                                                                                                                                                                                                                                                                                                                                                                                                                                                                                                                                                                                                                                                                 | A3-p-TS-2 | C 3.512341 -0.455833 0.000030<br>C 2.796621 0.705141 0.000028<br>C 1.400571 0.793748 0.000016                                                                                                                                                                                                                                                                                                                                                                                                                                                                                                                                                                                                                                                                                                                                       |

|           |                                 |           |                                 |
|-----------|---------------------------------|-----------|---------------------------------|
|           | C 0.699548 -0.442398 0.000006   |           | C 0.668198 -0.435309 0.000004   |
|           | C 1.441034 -1.644294 0.000010   |           | C 1.400746 -1.644852 0.000006   |
|           | C 2.821460 -1.641094 0.000026   |           | C 2.781179 -1.662985 0.000018   |
|           | C 0.683610 1.990300 0.000017    |           | C 0.703591 2.046729 0.000015    |
|           | C -0.758168 -0.402019 -0.000011 |           | C -0.786877 -0.383203 -0.000009 |
|           | C -1.428494 0.856274 -0.000013  |           | C -1.435279 0.885285 -0.000009  |
|           | C -0.656377 2.073372 0.000001   |           | C -0.652103 2.086474 0.000003   |
|           | H 3.379465 1.708301 0.000048    |           | H 1.285761 2.960483 0.000024    |
|           | H 0.924951 -2.595652 -0.000001  |           | H 0.874326 -2.590139 -0.000003  |
|           | H -1.174583 3.027395 -0.000001  |           | H -1.172393 3.038457 0.000002   |
|           | C -2.839574 0.899215 -0.000030  |           | C -2.846726 0.946172 -0.000022  |
|           | C -1.553962 -1.569493 -0.000025 |           | C -1.597130 -1.540893 -0.000021 |
|           | H -1.082096 -2.543415 -0.000024 |           | H -1.138300 -2.521055 -0.000021 |
|           | C -3.584825 -0.260078 -0.000044 |           | C -3.608776 -0.201545 -0.000034 |
|           | C -2.932671 -1.504067 -0.000041 |           | C -2.974471 -1.455401 -0.000033 |
|           | H -3.330663 1.866601 -0.000032  |           | H -3.324312 1.920424 -0.000022  |
|           | H -4.667876 -0.213664 -0.000057 |           | H -4.691041 -0.140002 -0.000043 |
|           | H -3.514075 -2.419058 -0.000052 |           | H -3.569336 -2.361788 -0.000042 |
|           | H 4.616331 -0.435901 0.000053   |           | H 4.596824 -0.460881 0.000040   |
|           | H 3.359656 -2.582183 0.000028   |           | H 3.309559 -2.610284 0.000019   |
|           | H 1.434690 3.287902 0.000032    |           | H 3.590677 1.979961 0.000041    |
|           | H 1.830647 4.040373 0.000040    |           | H 4.066943 2.683646 0.000048    |
|           | C 3.444623 -0.283060 0.000020   |           | C -3.534588 -0.096067 -0.000043 |
|           | C 2.771453 0.902341 0.000030    |           | C -2.749014 1.041563 -0.000047  |
|           | C 1.352554 0.879187 0.000020    |           | C -1.337265 0.959667 -0.000029  |
|           | C 0.669240 -0.372372 0.000000   |           | C -0.694963 -0.313362 -0.000005 |
|           | C 1.439041 -1.558613 -0.000010  |           | C -1.516716 -1.470579 0.000000  |
|           | C 2.823433 -1.527106 0.000000   |           | C -2.873349 -1.319498 -0.000019 |
|           | C 0.603903 2.101312 0.000030    |           | C -0.540780 2.152420 -0.000034  |
|           | C -0.787873 -0.379822 -0.000010 |           | C 0.758912 -0.376742 0.000014   |
|           | C -1.487719 0.860879 0.000000   |           | C 1.503992 0.837318 0.000008    |
|           | C -0.752562 2.091398 0.000020   |           | C 0.814333 2.094059 -0.000016   |
|           | H 1.148889 3.039221 0.000045    |           | H -1.049904 3.110346 -0.000052  |
|           | H 3.289494 1.856178 0.000045    |           | H -3.213854 2.022598 -0.000066  |
|           | H 0.947264 -2.523087 -0.000025  |           | H -1.079118 -2.461242 0.000018  |
|           | H -1.308919 3.022892 0.000028   |           | H 1.404209 3.004570 -0.000020   |
|           | C -2.900536 0.866061 -0.000009  |           | C 2.915890 0.787805 0.000027    |
|           | C -1.552327 -1.568206 -0.000029 |           | C 1.475717 -1.594226 0.000038   |
|           | H -1.056380 -2.530056 -0.000037 |           | H 0.941647 -2.535556 0.000043   |
|           | C -3.616536 -0.310748 -0.000028 |           | C 3.585640 -0.416103 0.000050   |
|           | C -2.932030 -1.537816 -0.000038 |           | C 2.855431 -1.616770 0.000056   |
|           | H -3.416188 1.820732 -0.000001  |           | H 3.468288 1.721681 0.000022    |
|           | H -4.700360 -0.292674 -0.000034 |           | H 4.669393 -0.439532 0.000063   |
|           | H -3.489776 -2.467496 -0.000053 |           | H 3.377685 -2.566781 0.000074   |
|           | H 3.397222 -2.447109 -0.000008  |           | H -4.616849 -0.032765 -0.000057 |
|           | H 4.946991 -0.242098 0.000030   |           | H -3.706582 -2.566162 -0.000013 |
|           | H 5.793794 -0.217118 0.000036   |           | H -4.174363 -3.274072 -0.000009 |
| A3-p-TS-3 | C 3.444623 -0.283060 0.000020   | A3-p-TS-4 | C -3.534588 -0.096067 -0.000043 |
|           | C 2.771453 0.902341 0.000030    |           | C -2.749014 1.041563 -0.000047  |
|           | C 1.352554 0.879187 0.000020    |           | C -1.337265 0.959667 -0.000029  |
|           | C 0.669240 -0.372372 0.000000   |           | C -0.694963 -0.313362 -0.000005 |
|           | C 1.439041 -1.558613 -0.000010  |           | C -1.516716 -1.470579 0.000000  |
|           | C 2.823433 -1.527106 0.000000   |           | C -2.873349 -1.319498 -0.000019 |
|           | C 0.603903 2.101312 0.000030    |           | C -0.540780 2.152420 -0.000034  |
|           | C -0.787873 -0.379822 -0.000010 |           | C 0.758912 -0.376742 0.000014   |
|           | C -1.487719 0.860879 0.000000   |           | C 1.503992 0.837318 0.000008    |
|           | C -0.752562 2.091398 0.000020   |           | C 0.814333 2.094059 -0.000016   |
|           | H 1.148889 3.039221 0.000045    |           | H -1.049904 3.110346 -0.000052  |
|           | H 3.289494 1.856178 0.000045    |           | H -3.213854 2.022598 -0.000066  |
|           | H 0.947264 -2.523087 -0.000025  |           | H -1.079118 -2.461242 0.000018  |
|           | H -1.308919 3.022892 0.000028   |           | H 1.404209 3.004570 -0.000020   |
|           | C -2.900536 0.866061 -0.000009  |           | C 2.915890 0.787805 0.000027    |
|           | C -1.552327 -1.568206 -0.000029 |           | C 1.475717 -1.594226 0.000038   |
|           | H -1.056380 -2.530056 -0.000037 |           | H 0.941647 -2.535556 0.000043   |
|           | C -3.616536 -0.310748 -0.000028 |           | C 3.585640 -0.416103 0.000050   |
|           | C -2.932030 -1.537816 -0.000038 |           | C 2.855431 -1.616770 0.000056   |
|           | H -3.416188 1.820732 -0.000001  |           | H 3.468288 1.721681 0.000022    |
|           | H -4.700360 -0.292674 -0.000034 |           | H 4.669393 -0.439532 0.000063   |
|           | H -3.489776 -2.467496 -0.000053 |           | H 3.377685 -2.566781 0.000074   |
|           | H 3.397222 -2.447109 -0.000008  |           | H -4.616849 -0.032765 -0.000057 |
|           | H 4.946991 -0.242098 0.000030   |           | H -3.706582 -2.566162 -0.000013 |
|           | H 5.793794 -0.217118 0.000036   |           | H -4.174363 -3.274072 -0.000009 |
|           | C -3.566380 -0.297395 -0.000009 |           | C 3.580955 -0.213801 0.000049   |
|           | C -2.859033 0.885016 -0.000032  |           | C 2.850286 0.954239 0.000067    |
|           | C -1.446451 0.888986 -0.000026  |           | C 1.438705 0.917129 0.000044    |
|           | C -0.742401 -0.348790 0.000006  |           | C 0.748305 -0.337066 0.000006   |
|           | C -1.494686 -1.543921 0.000026  |           | C 1.536486 -1.509208 -0.000020  |
|           | C -2.874717 -1.520554 0.000019  |           | C 2.915825 -1.451770 0.000002   |
|           | C -0.716712 2.122833 -0.000055  |           | C 0.632137 2.077545 0.000051    |
|           | C 0.711606 -0.332300 0.000013   |           | C -0.710645 -0.348669 -0.000013 |
|           | C 1.399461 0.923410 -0.000022   |           | C -1.429466 0.883575 -0.000012  |
|           | C 0.639585 2.139304 -0.000055   |           | C -0.704120 2.134040 0.000023   |
|           | H -1.277359 3.051676 -0.000079  |           | H 3.342836 1.919336 0.000097    |
|           | H -3.381415 1.836009 -0.000055  |           | H 1.057778 -2.480031 -0.000064  |
|           | H -0.984916 -2.496829 0.000046  |           | H -1.256531 3.068295 0.000023   |
|           | H 1.179270 3.080553 -0.000080   |           | C -2.840942 0.872068 -0.000039  |
|           | C 2.812636 0.953402 -0.000022   |           | C -1.461828 -1.545294 -0.000030 |
|           | C 1.534350 -1.467557 0.000051   |           | C -0.952607 -2.500215 -0.000021 |
|           | H 1.064169 -2.861270 0.000137   |           | C -3.540933 -0.315295 -0.000059 |
|           | C 3.557780 -0.205459 0.000013   |           | C -2.842083 -1.533408 -0.000052 |
|           | C 2.901455 -1.453475 0.000053   |           | H -3.368951 1.819783 -0.000042  |
|           | H 3.307936 1.918496 -0.000051   |           | H -4.625032 -0.310138 -0.000079 |
|           | H 4.641392 -0.164381 0.000011   |           | H -3.387911 -2.470032 -0.000060 |
|           | H 3.469081 -2.377739 0.000088   |           | H 4.664342 -0.180122 0.000067   |
|           | H -4.650377 -0.286114 -0.000014 |           | H 3.489986 -2.371387 -0.000018  |
|           | H -3.427220 -2.453344 0.000035  |           |                                 |
|           | H 0.920485 -3.708066 0.000192   |           |                                 |
| A3-p-P-2  | C 3.619616 -0.188314 0.000061   | A3-p-P-3  | C 3.541192 -0.319042 0.000064   |

|          |                                 |          |                                 |
|----------|---------------------------------|----------|---------------------------------|
|          | C 2.819715 0.910043 0.000075    |          | C 2.898010 0.877280 0.000074    |
|          | C 1.427110 0.931654 0.000049    |          | C 1.476037 0.863698 0.000045    |
|          | C 0.771650 -0.341587 0.000008   |          | C 0.783186 -0.383202 0.000011   |
|          | C 1.577913 -1.503979 -0.000015  |          | C 1.541179 -1.577355 -0.000007  |
|          | C 2.957280 -1.438788 0.000010   |          | C 2.928244 -1.561631 0.000021   |
|          | C 0.659522 2.142657 0.000056    |          | C 0.737058 2.091541 0.000045    |
|          | C -0.684052 -0.374200 -0.000014 |          | C -0.674105 -0.378746 -0.000012 |
|          | C -1.405757 0.854298 -0.000016  |          | C -1.364340 0.867414 -0.000023  |
|          | C -0.696137 2.100942 0.000019   |          | C -0.619504 2.091916 0.000007   |
|          | H 1.190903 3.086800 0.000089    |          | H 1.289391 3.025134 0.000072    |
|          | H 1.110802 -2.479882 -0.000063  |          | H 3.425293 1.825720 0.000102    |
|          | H -1.273261 3.019596 0.000021   |          | H 1.040421 -2.537371 -0.000051  |
|          | C -2.818253 0.831358 -0.000048  |          | H -1.168404 3.027875 0.000002   |
|          | C -1.424520 -1.577598 -0.000032 |          | C -2.777092 0.883980 -0.000057  |
|          | H -0.908053 -2.528594 -0.000018 |          | C -1.448504 -1.560809 -0.000023 |
|          | C -3.511467 -0.359325 -0.000071 |          | H -0.960568 -2.526778 0.000001  |
|          | C -2.804584 -1.573603 -0.000060 |          | C -3.502761 -0.286883 -0.000075 |
|          | H -3.352738 1.775619 -0.000053  |          | C -2.827939 -1.519298 -0.000055 |
|          | H -4.595480 -0.361484 -0.000097 |          | H -3.284947 1.842861 -0.000067  |
|          | H -3.344886 -2.513542 -0.000071 |          | H -4.586417 -0.260036 -0.000103 |
|          | H 4.702000 -0.127507 0.000081   |          | H -3.393040 -2.444566 -0.000060 |
|          | H 3.542501 -2.352354 -0.000010  |          | H 3.494302 -2.486007 0.000006   |
|          | C 3.603007 -0.431137 0.000046   |          | C 3.558712 -0.368206 0.000039   |
|          | C 2.900489 0.762548 0.000056    |          | C 2.855024 0.818602 0.000048    |
|          | C 1.486275 0.785315 0.000035    |          | C 1.440944 0.841019 0.000032    |
|          | C 0.748243 -0.435174 0.000006   |          | C 0.719563 -0.393868 0.000006   |
|          | C 1.480041 -1.654634 -0.000015  |          | C 1.507329 -1.541091 -0.000004  |
|          | C 2.838165 -1.586652 0.000009   |          | C 2.866075 -1.603461 0.000010   |
|          | C 0.782070 2.034842 0.000040    |          | C 0.699961 2.069709 0.000044    |
|          | C -0.705943 -0.388202 -0.000010 |          | C -0.728370 -0.389403 -0.000014 |
|          | C -1.356626 0.879151 -0.000014  |          | C -1.414158 0.855362 -0.000003  |
|          | C -0.573631 2.079899 0.000012   |          | C -0.658366 2.075400 0.000027   |
|          | H 1.362408 2.951457 0.000064    |          | H 1.253297 3.003142 0.000065    |
|          | H 3.437517 1.706258 0.000079    |          | H 3.388201 1.763174 0.000069    |
|          | H 0.970730 -2.610157 -0.000054  |          | H -1.200849 3.015099 0.000036   |
|          | H -1.092443 3.032629 0.000012   |          | C -2.826671 0.860650 -0.000024  |
|          | C -2.768359 0.935906 -0.000040  |          | C -1.479470 -1.583060 -0.000046 |
|          | C -1.512398 -1.548121 -0.000022 |          | H -0.953022 -2.530999 -0.000058 |
|          | H -1.050340 -2.526968 -0.000006 |          | C -3.539279 -0.319958 -0.000051 |
|          | C -3.527067 -0.214097 -0.000056 |          | C -2.858952 -1.551173 -0.000062 |
|          | C -2.889879 -1.466682 -0.000044 |          | H -3.346013 1.813372 -0.000016  |
|          | H -3.248863 1.908754 -0.000044  |          | H -4.623241 -0.301379 -0.000066 |
|          | H -4.609521 -0.155431 -0.000077 |          | H -3.421183 -2.478152 -0.000083 |
|          | H -3.482422 -2.374539 -0.000050 |          | H 4.643447 -0.363142 0.000051   |
|          | H 4.686602 -0.449776 0.000062   |          | H 3.405308 -2.544244 0.000000   |
| A3-p-P-4 | C 4.880889 -0.714776 0.000011   | A3-p-P-5 | C 4.871917 -0.770692 -0.000036  |
|          | C 4.880889 0.714776 0.000035    |          | C 4.882572 0.658330 -0.000012   |
|          | C 3.706615 1.407260 0.000041    |          | C 2.436894 -0.770407 -0.000024  |
|          | H 3.705811 2.492293 0.000059    |          | C 1.217787 -1.439670 -0.000030  |
|          | C 2.446292 0.725014 0.000024    |          | C -0.015991 -0.758472 -0.000013 |
|          | C 2.446292 -0.725014 -0.000001  |          | C -0.017190 0.699166 0.000012   |
|          | C 3.706615 -1.407260 -0.000006  |          | C 1.230808 1.323481 0.000016    |
|          | H 3.705811 -2.492293 -0.000024  |          | C 2.452287 0.687203 0.000000    |
|          | C -0.000227 0.725011 0.000012   |          | C -1.253177 -1.429880 -0.000018 |
|          | C -1.233530 1.404315 0.000018   |          | C -1.247035 1.384911 0.000029   |
|          | C -2.446606 0.724778 0.000001   |          | C -2.459662 0.704793 0.000023   |
|          | C -2.446606 -0.724778 -0.000024 |          | C -2.463279 -0.744752 -0.000001 |
|          | C -1.233530 -1.404315 -0.000029 |          | C -3.724756 -1.423789 -0.000006 |
|          | C -0.000227 -0.725011 -0.000012 |          | H -3.727064 -2.508733 -0.000024 |
|          | C -3.706486 1.407369 0.000006   |          | C -4.897401 -0.727950 0.000011  |
|          | C -3.706486 -1.407369 -0.000041 |          | C -4.893838 0.701020 0.000034   |
|          | C -4.880793 -0.714200 -0.000035 |          | C -3.717560 1.390614 0.000040   |
|          | C -4.880793 0.714200 -0.000011  |          | H -1.258511 -2.515715 -0.000036 |
|          | H -3.706134 2.492316 0.000024   |          | H 1.212803 -2.525121 -0.000048  |
|          | H -1.234424 2.490067 0.000036   |          | H 1.239358 2.828737 0.000043    |
|          | H -1.234424 -2.490067 -0.000048 |          | H -1.242826 2.469166 0.000047   |
|          | H -3.706134 -2.492316 -0.000059 |          | H -3.713666 2.475478 0.000058   |
|          | C 1.233969 -1.404444 -0.000018  |          | C 3.715757 1.363485 0.000006    |
|          | C 1.233969 1.404444 0.000029    |          | C 3.693783 -1.457181 -0.000042  |
|          | H 1.233811 -2.490201 -0.000036  |          | H 3.721894 2.446981 0.000024    |
|          | H 1.233811 2.490201 0.000048    |          | H 3.687450 -2.542284 -0.000060  |
|          | H 5.826670 -1.244812 0.000006   |          | H -5.838022 1.233745 0.000048   |
|          | H 5.826670 1.244812 0.000049    |          | H -5.844324 -1.255848 0.000006  |
| A4       |                                 | A4-TS-1  |                                 |

|            |                                                                                                                                                                                                                                                                                                                                                                                                                                                                                                                                                                                                                                                                                                                                                                                                                                                                                                                                                                                                                                                                            |            |                                                                                                                                                                                                                                                                                                                                                                                                                                                                                                                                                                                                                                                                                                                                                                                                                                                                                                                                                                                                         |
|------------|----------------------------------------------------------------------------------------------------------------------------------------------------------------------------------------------------------------------------------------------------------------------------------------------------------------------------------------------------------------------------------------------------------------------------------------------------------------------------------------------------------------------------------------------------------------------------------------------------------------------------------------------------------------------------------------------------------------------------------------------------------------------------------------------------------------------------------------------------------------------------------------------------------------------------------------------------------------------------------------------------------------------------------------------------------------------------|------------|---------------------------------------------------------------------------------------------------------------------------------------------------------------------------------------------------------------------------------------------------------------------------------------------------------------------------------------------------------------------------------------------------------------------------------------------------------------------------------------------------------------------------------------------------------------------------------------------------------------------------------------------------------------------------------------------------------------------------------------------------------------------------------------------------------------------------------------------------------------------------------------------------------------------------------------------------------------------------------------------------------|
|            | H -5.826470 -1.245021 -0.000049<br>H -5.826470 1.245021 -0.000007                                                                                                                                                                                                                                                                                                                                                                                                                                                                                                                                                                                                                                                                                                                                                                                                                                                                                                                                                                                                          |            | H 1.245010 3.678792 0.000059<br>H 5.832458 1.180734 -0.000007<br>H 5.813947 -1.307185 -0.000049                                                                                                                                                                                                                                                                                                                                                                                                                                                                                                                                                                                                                                                                                                                                                                                                                                                                                                         |
| A4-TS-2    | C 4.846117 -0.816876 -0.000036<br>C 4.873579 0.619442 -0.000012<br>C 2.404165 -0.790343 -0.000024<br>C 1.181682 -1.450462 -0.000029<br>C -0.042900 -0.753570 -0.000012<br>C -0.025726 0.696308 0.000012<br>C 1.214335 1.364434 0.000017<br>C 2.415878 0.666751 0.000000<br>C -1.284412 -1.418010 -0.000018<br>C -1.250750 1.390863 0.000029<br>C -2.471648 0.725826 0.000023<br>C -2.488957 -0.723626 -0.000001<br>C -3.756815 -1.390855 -0.000006<br>H -3.769457 -2.475754 -0.000024<br>C -4.922749 -0.683864 0.000011<br>C -4.905646 0.745153 0.000034<br>C -3.722935 1.423643 0.000040<br>H -1.297913 -2.503604 -0.000035<br>H 1.166391 -2.536202 -0.000047<br>H -1.237392 2.476385 0.000046<br>H -3.709077 2.508507 0.000058<br>C 3.695909 1.278893 0.000005<br>C 3.658193 -1.486450 -0.000041<br>H 3.758810 2.777314 0.000031<br>H 3.641799 -2.571118 -0.000059<br>H -5.844839 1.286688 0.000048<br>H -5.874727 -1.202630 0.000007<br>H 5.822489 1.145153 -0.000007<br>H 5.783689 -1.361991 -0.000049<br>H 3.826035 3.625033 0.000045<br>H 1.230273 2.448664 0.000035 | A4-P-1     | C 4.900785 0.673845 -0.000011<br>C 4.899934 -0.755802 -0.000036<br>C 3.727302 -1.450934 -0.000042<br>H 3.718189 -2.534315 -0.000060<br>C 2.471570 -0.760184 -0.000024<br>C 2.464939 0.700405 0.000000<br>C 3.729992 1.372890 0.000006<br>H 3.735527 2.458055 0.000024<br>C -0.006063 -0.752031 -0.000013<br>C -1.238083 -1.432078 -0.000018<br>C -2.446344 -0.743031 -0.000001<br>C -2.438884 0.706733 0.000023<br>C -1.224005 1.385199 0.000029<br>C 0.009434 0.708112 0.000012<br>C -3.708743 -1.419496 -0.000007<br>C -3.695214 1.394467 0.000041<br>C -4.873276 0.706822 0.000034<br>C -4.880365 -0.721101 0.000011<br>H -3.713347 -2.504346 -0.000025<br>H -1.236889 -2.516253 -0.000036<br>H -1.224545 2.471102 0.000047<br>H -3.690554 2.479380 0.000059<br>C 1.250543 1.378836 0.000018<br>C 1.241196 -1.364093 -0.000029<br>H 1.253853 2.464083 0.000036<br>H 5.847873 1.201490 -0.000007<br>H 5.845776 -1.285428 -0.000049<br>H -5.816006 1.242649 0.000048<br>H -5.828187 -1.247773 0.000006 |
| A4-P-2     | C 4.859809 -0.688043 0.000010<br>C 4.843805 0.741083 0.000035<br>C 3.661820 1.420784 0.000041<br>H 3.649120 2.505692 0.000059<br>C 2.409729 0.724316 0.000023<br>C 2.425978 -0.725162 -0.000001<br>C 3.693211 -1.393757 -0.000007<br>H 3.704432 -2.478666 -0.000025<br>C -0.036611 0.697819 0.000012<br>C -1.276403 1.367851 0.000017<br>C -2.484282 0.681763 0.000000<br>C -2.459896 -0.777646 -0.000024<br>C -1.243903 -1.449406 -0.000030<br>C -0.020027 -0.752201 -0.000013<br>C -3.756033 1.346326 0.000006<br>C -3.727574 -1.400462 -0.000041<br>C -4.926223 -0.791439 -0.000036<br>C -4.928303 0.649452 -0.000011<br>H -3.766334 2.430955 0.000024<br>H -1.284633 2.453713 0.000036<br>H -1.239207 -2.533652 -0.000048<br>C 1.220881 -1.418144 -0.000018<br>C 1.189448 1.390521 0.000029<br>H 1.232325 -2.503700 -0.000036<br>H 1.177657 2.476154 0.000047<br>H 5.811373 -1.207533 0.000006<br>H 5.783549 1.281704 0.000048<br>H -5.862210 -1.339030 -0.000050<br>H -5.878627 1.172432 -0.000007                                                                    | A4-py      | C 3.518205 0.000000 0.000368<br>C 2.828903 -1.208574 0.000306<br>C 1.427079 -1.234372 0.000158<br>C 0.712474 0.000000 0.000072<br>C 1.427078 1.234373 0.000133<br>C 2.828900 1.208575 0.000280<br>C 0.679174 -2.460718 0.000092<br>C -0.712474 0.000000 -0.000075<br>C -1.427077 -1.234373 -0.000137<br>C -0.679171 -2.460719 -0.000050<br>C -2.828901 -1.208575 -0.000280<br>H -3.375035 -2.145968 -0.000327<br>C -3.518205 -0.000003 -0.000359<br>C -2.828902 1.208574 -0.000300<br>C -1.427080 1.234373 -0.000157<br>C -0.679174 2.460719 -0.000094<br>C 0.679171 2.460720 0.000043<br>H 1.227053 3.397296 0.000084<br>H -1.227058 3.397295 -0.000157<br>H 1.227056 -3.397296 0.000155<br>H 4.602471 0.000002 0.000483<br>H 3.375038 -2.145966 0.000375<br>H 3.375039 2.145965 0.000326<br>H -1.227055 -3.397295 -0.000101<br>H -4.602471 -0.000001 -0.000470<br>H -3.375039 2.145964 -0.000363                                                                                                      |
| A4-py-TS-1 | C -3.573544 0.000000 -0.000349<br>C -2.883687 -1.208009 -0.000293<br>C -1.481859 -1.233796 -0.000154<br>C -0.765908 0.000000 -0.000072<br>C -1.481859 1.233796 -0.000131<br>C -2.883687 1.208008 -0.000270<br>C -0.736716 -2.461071 -0.000094<br>C 0.659724 0.000000 0.000065<br>C 1.370096 -1.239036 0.000121<br>C 0.621604 -2.464380 0.000038                                                                                                                                                                                                                                                                                                                                                                                                                                                                                                                                                                                                                                                                                                                            | A4-py-TS-2 | C 3.553375 0.172423 -0.000361<br>C 2.797016 1.340195 -0.000307<br>C 1.396073 1.286888 -0.000162<br>C 0.753256 0.013435 -0.000072<br>C 1.536041 -1.179054 -0.000129<br>C 2.934025 -1.073400 -0.000273<br>C 0.581476 2.470108 -0.000102<br>C -0.668723 -0.068901 0.000070<br>C -1.449529 1.132279 0.000123<br>C -0.774884 2.400325 0.000034                                                                                                                                                                                                                                                                                                                                                                                                                                                                                                                                                                                                                                                               |

|            |                                                                                                                                                                                                                                                                                                                                                                                                                                                                                                                                                                                                                                                                                                                                                                                                                                                                                                                                       |           |                                                                                                                                                                                                                                                                                                                                                                                                                                                                                                                                                                                                                                                                                                                                                                                                                                                                    |
|------------|---------------------------------------------------------------------------------------------------------------------------------------------------------------------------------------------------------------------------------------------------------------------------------------------------------------------------------------------------------------------------------------------------------------------------------------------------------------------------------------------------------------------------------------------------------------------------------------------------------------------------------------------------------------------------------------------------------------------------------------------------------------------------------------------------------------------------------------------------------------------------------------------------------------------------------------|-----------|--------------------------------------------------------------------------------------------------------------------------------------------------------------------------------------------------------------------------------------------------------------------------------------------------------------------------------------------------------------------------------------------------------------------------------------------------------------------------------------------------------------------------------------------------------------------------------------------------------------------------------------------------------------------------------------------------------------------------------------------------------------------------------------------------------------------------------------------------------------------|
|            | C 2.777910 -1.220648 0.000257<br>H 3.333330 -2.152932 0.000302<br>C 3.413559 0.000000 0.000332<br>C 2.777909 1.220648 0.000279<br>C 1.370096 1.239036 0.000144<br>C 0.621604 2.464380 0.000085<br>C -0.736716 2.461071 -0.000047<br>H -1.286074 3.396806 -0.000085<br>H 1.168263 3.401442 0.000147<br>H -1.286074 -3.396806 -0.000153<br>H -4.657749 0.000000 -0.000454<br>H -3.429304 -2.145686 -0.000356<br>H -3.429304 2.145686 -0.000310<br>H 1.168263 -3.401442 0.000086<br>H 4.912696 -0.000001 0.000470<br>H 3.333330 2.152933 0.000342<br>H 5.761467 -0.000001 0.000545                                                                                                                                                                                                                                                                                                                                                       |           | C -2.829174 0.974444 0.000262<br>H -3.694387 2.207960 0.000317<br>C -3.484121 -0.236870 0.000347<br>C -2.716842 -1.403801 0.000294<br>C -1.315396 -1.341658 0.000156<br>C -0.497285 -2.522848 0.000100<br>C 0.858723 -2.445554 -0.000035<br>H 1.458590 -3.349657 -0.000070<br>H -0.990229 -3.489347 0.000167<br>H 1.077559 3.435031 -0.000166<br>H 4.635896 0.233936 -0.000470<br>H 3.289322 2.306890 -0.000375<br>H 3.532471 -1.978264 -0.000312<br>H -1.374295 3.303124 0.000082<br>H -4.567603 -0.289568 0.000453<br>H -3.206144 -2.372534 0.000361<br>H -4.205364 2.884360 0.000350                                                                                                                                                                                                                                                                            |
| A4-py-TS-3 | C -3.501712 -0.187472 0.000208<br>C -2.868628 1.051535 0.000365<br>C -1.469735 1.132303 0.000283<br>C -0.693971 -0.071924 0.000036<br>C -1.358665 -1.333411 -0.000121<br>C -2.760666 -1.364715 -0.000031<br>H -1.506325 3.633796 0.000699<br>H -4.584764 -0.235171 0.000274<br>H -3.451473 1.964869 0.000553<br>C -0.733864 2.349670 0.000430<br>C 0.731168 -0.010296 -0.000052<br>H -3.266598 -2.324315 -0.000152<br>C 1.403356 1.249388 0.000105<br>C 0.606372 2.453434 0.000355<br>H 1.106374 3.417254 0.000479<br>H -1.916290 4.378982 0.000855<br>C -0.561188 -2.528097 -0.000369<br>C 1.493345 -1.216166 -0.000298<br>C 0.795686 -2.471746 -0.000453<br>C 2.804034 1.277501 0.000013<br>C 2.893483 -1.137923 -0.000382<br>C 3.537426 0.094636 -0.000228<br>H 3.314573 2.234520 0.000133<br>H 4.620893 0.135273 -0.000297<br>H 3.473569 -2.054543 -0.000571<br>H 1.381743 -3.384820 -0.000642<br>H -1.070362 -3.486154 -0.000490 | A4-py-P-1 | C 3.471322 -0.000001 0.000358<br>C 2.781158 -1.207792 0.000298<br>C 1.379299 -1.233500 0.000156<br>C 0.662840 0.000000 0.000072<br>C 1.379301 1.233501 0.000135<br>C 2.781155 1.207793 0.000278<br>C 0.634947 -2.461195 0.000094<br>C -0.763229 0.000000 -0.000078<br>C -1.472261 -1.240443 -0.000139<br>C -0.723237 -2.465500 -0.000047<br>C -2.882969 -1.225083 -0.000293<br>H -3.439080 -2.156549 -0.000343<br>C -3.498316 -0.000003 -0.000373<br>C -2.882966 1.225082 -0.000317<br>C -1.472266 1.240444 -0.000165<br>C -0.723238 2.465502 -0.000097<br>C 0.634945 2.461196 0.000048<br>H 1.185134 3.396395 0.000098<br>H -1.269845 3.402488 -0.000162<br>H 1.185136 -3.396393 0.000161<br>H 4.555454 0.000001 0.000464<br>H 3.326612 -2.145504 0.000361<br>H 3.326615 2.145502 0.000326<br>H -1.269844 -3.402486 -0.000093<br>H -3.439087 2.156543 -0.000390   |
| A4-py-P-2  | C -3.482453 -0.126150 0.000361<br>C -2.846470 1.111448 0.000299<br>C -1.447329 1.198118 0.000156<br>C -0.681375 -0.005350 0.000072<br>C -1.340573 -1.270327 0.000137<br>C -2.742338 -1.304203 0.000281<br>C -0.755539 2.457882 0.000091<br>C 0.741836 0.053619 -0.000076<br>C 1.396697 1.329390 -0.000140<br>C 0.600862 2.525249 -0.000050<br>C 2.779119 1.291379 -0.000286<br>C 3.566698 0.168262 -0.000375<br>C 2.915056 -1.070728 -0.000312<br>C 1.514011 -1.147474 -0.000162<br>C 0.817400 -2.404353 -0.000093<br>C -0.539588 -2.462758 0.000050<br>H -1.046094 -3.422099 0.000098<br>H 1.404292 -3.316806 -0.000158<br>H -1.347077 3.367346 0.000157<br>H -4.565642 -0.172790 0.000469<br>H -3.432788 2.024079 0.000363<br>H -3.248022 -2.263901 0.000330<br>H 1.111133 3.480984 -0.000099<br>H 4.649512 0.225047 -0.000492<br>H 3.498601 -1.985875 -0.000380                                                                    | A4-py-P-3 | C 3.536849 -0.109276 -0.000347<br>C 2.869088 1.111551 -0.000314<br>C 1.467906 1.167957 -0.000177<br>C 0.725300 -0.049138 -0.000070<br>C 1.428084 -1.298838 -0.000108<br>C 2.829389 -1.307255 -0.000245<br>C 0.745659 2.409810 -0.000142<br>C -0.701729 -0.024308 0.000070<br>C -1.386908 1.226900 0.000103<br>C -0.611991 2.436807 -0.000008<br>C -2.789225 1.237299 0.000243<br>H -3.310721 2.188402 0.000269<br>C -3.509130 0.047612 0.000348<br>C -2.852002 -1.179373 0.000316<br>C -1.452499 -1.239489 0.000178<br>C -0.732026 -2.495882 0.000144<br>C 0.606224 -2.452151 0.000005<br>H -1.290010 -3.426958 0.000223<br>H 1.313285 3.334459 -0.000224<br>H 4.620769 -0.127516 -0.000450<br>H 3.433417 2.037969 -0.000394<br>H 3.350719 -2.256824 -0.000270<br>H -1.140599 3.384227 0.000018<br>H -4.593022 0.075150 0.000457<br>H -3.421766 -2.102267 0.000399 |
| A4-p       | C 2.402486 1.890068 0.345564<br>C 1.216441 2.534133 0.192120<br>C 0.000041 1.810241 0.000052<br>C -0.000001 0.394764 0.000139                                                                                                                                                                                                                                                                                                                                                                                                                                                                                                                                                                                                                                                                                                                                                                                                         | A4-p-TS-1 | C -2.383921 1.936993 -0.318023<br>C -1.196526 2.572333 -0.137571<br>C 0.017282 1.841373 0.043264<br>C 0.011009 0.426668 0.028757                                                                                                                                                                                                                                                                                                                                                                                                                                                                                                                                                                                                                                                                                                                                   |



|          |                                                                                                                                                                                                                                                                                                                                                                                                                                                                                                                                                                                                                                                                                                                                                                                                                                                                                                                                                                                                          |         |                                                                                                                                                                                                                                                                                                                                                                                                                                                                                                                                                                                                                                                                                                                                                                                                                                                                                                                                                                                                                                                                                                                                                                                                                                                    |
|----------|----------------------------------------------------------------------------------------------------------------------------------------------------------------------------------------------------------------------------------------------------------------------------------------------------------------------------------------------------------------------------------------------------------------------------------------------------------------------------------------------------------------------------------------------------------------------------------------------------------------------------------------------------------------------------------------------------------------------------------------------------------------------------------------------------------------------------------------------------------------------------------------------------------------------------------------------------------------------------------------------------------|---------|----------------------------------------------------------------------------------------------------------------------------------------------------------------------------------------------------------------------------------------------------------------------------------------------------------------------------------------------------------------------------------------------------------------------------------------------------------------------------------------------------------------------------------------------------------------------------------------------------------------------------------------------------------------------------------------------------------------------------------------------------------------------------------------------------------------------------------------------------------------------------------------------------------------------------------------------------------------------------------------------------------------------------------------------------------------------------------------------------------------------------------------------------------------------------------------------------------------------------------------------------|
|          | C 1.287810 -0.279825 -0.055455<br>C 2.479911 0.474616 0.186304<br>C -1.216341 2.534163 -0.192123<br>C -1.287835 -0.279744 0.055706<br>C -2.479908 0.474696 -0.186285<br>C -2.402402 1.890144 -0.345592<br>C -3.737297 -0.173262 -0.190728<br>H -4.621003 0.418513 -0.405743<br>C -3.851832 -1.511258 0.107019<br>C -2.700094 -2.235816 0.460392<br>C -1.458432 -1.636113 0.437570<br>H -1.166445 3.616945 -0.236243<br>H 3.316003 2.444305 0.532571<br>H 1.166602 3.616924 0.236071<br>H -3.315870 2.444417 -0.532733<br>H -4.822755 -1.993294 0.109465<br>H -2.787500 -3.270302 0.773213<br>H -0.606231 -2.206586 0.773943<br>C 1.458351 -1.636183 -0.437386<br>C 3.737312 -0.173302 0.190478<br>H 0.606087 -2.206744 -0.773486<br>H 4.621044 0.418502 0.405291<br>C 2.699997 -2.235848 -0.460432<br>C 3.851783 -1.511320 -0.107162<br>H 2.787396 -3.270301 -0.773360<br>H 4.822730 -1.993299 -0.110077                                                                                                 |         | C -1.278279 -0.240310 0.062186<br>C -2.471580 0.518557 -0.194283<br>C 1.242048 2.554548 0.220947<br>C 1.288906 -0.259839 -0.047556<br>C 2.492451 0.486032 0.156737<br>C 2.427853 1.900414 0.330821<br>C 3.743753 -0.172080 0.114513<br>H 4.640205 0.410699 0.298887<br>C 3.833608 -1.510676 -0.188943<br>C 2.662662 -2.229602 -0.489000<br>C 1.428448 -1.620427 -0.418282<br>H 1.201233 3.637001 0.278874<br>H -3.292163 2.499108 -0.507372<br>H -1.142881 3.655519 -0.161643<br>H 3.349838 2.447500 0.496246<br>H 4.799602 -2.001037 -0.229063<br>H 2.729143 -3.269194 -0.789342<br>H 0.550030 -2.188653 -0.685595<br>C -1.502324 -1.587634 0.403679<br>C -3.727409 -0.131573 -0.255738<br>H -0.565927 -2.352710 1.163193<br>H -4.603491 0.466054 -0.483820<br>C -2.717866 -2.213555 0.393098<br>C -3.855945 -1.476730 0.003074<br>H -2.810821 -3.247016 0.709704<br>H -4.826516 -1.958308 -0.040009<br>H -0.113267 -2.865924 1.703869                                                                                                                                                                                                                                                                                                            |
| A4-p-P-1 | C 2.433687 1.905224 -0.000028<br>C 1.232477 2.539769 -0.000013<br>C 0.000999 1.814729 0.000003<br>C -0.004297 0.400546 0.000002<br>C 1.278209 -0.277595 0.000001<br>C 2.500751 0.481270 -0.000020<br>C -1.227181 2.543953 0.000019<br>C -1.283670 -0.288012 -0.000002<br>C -2.490193 0.480651 0.000010<br>C -2.425642 1.905263 0.000024<br>C -3.743770 -0.174558 0.000002<br>H -4.642912 0.432837 0.000010<br>C -3.831615 -1.547188 -0.000014<br>C -2.652006 -2.312757 -0.000022<br>C -1.418849 -1.697388 -0.000014<br>H -1.180052 3.627667 0.000035<br>H 3.359900 2.470101 -0.000044<br>H 1.185737 3.623555 -0.000016<br>H -3.353197 2.467833 0.000034<br>H -4.799160 -2.036200 -0.000024<br>H -2.710269 -3.395420 -0.000030<br>H -0.523814 -2.309908 -0.000024<br>C 1.475648 -1.658447 0.000024<br>C 3.748896 -0.187635 -0.000010<br>H 4.651379 0.414136 -0.000018<br>C 2.653404 -2.336446 0.000020<br>C 3.838190 -1.561624 0.000015<br>H 2.696991 -3.420211 0.000048<br>H 4.805170 -2.052900 0.000031 | A5      | C -6.107570 0.715774 0.000017<br>C -6.107570 -0.715774 0.000041<br>C -4.934793 -1.408406 0.000047<br>H -4.934727 -2.493389 0.000065<br>C -3.672386 -0.726676 0.000029<br>C -3.672386 0.726675 0.000005<br>C -4.934793 1.408406 -0.000001<br>H -4.934726 2.493389 -0.000019<br>C -1.224402 -0.727460 0.000018<br>C -0.000012 -1.406654 0.000024<br>C 1.224429 -0.727459 0.000007<br>C 1.224429 0.727459 -0.000018<br>C -0.000012 1.406654 -0.000024<br>C -1.224402 0.727460 -0.000006<br>C 2.464011 -1.406141 0.000012<br>C 2.464011 1.406141 -0.000035<br>C 3.672406 0.726659 -0.000029<br>C 3.672406 -0.726659 -0.000005<br>C 4.934774 -1.408397 0.000001<br>H 4.934737 -2.493379 0.000019<br>C 6.107575 -0.715761 -0.000016<br>C 6.107575 0.715761 -0.000041<br>C 4.934774 1.408397 -0.000047<br>H 2.464697 -2.491824 0.000030<br>H 0.000001 -2.492239 0.000042<br>H 0.000000 2.492239 -0.000042<br>H 2.464697 2.491824 -0.000053<br>H 4.934737 2.493379 -0.000065<br>C -2.464035 1.406145 -0.000012<br>C -2.464035 -1.406145 0.000035<br>H -2.464678 2.491830 -0.000030<br>H -2.464678 -2.491830 0.000053<br>H 7.053507 1.245462 -0.000054<br>H 7.053507 -1.245462 -0.000012<br>H -7.053510 1.245463 0.000012<br>H -7.053510 -1.245462 0.000054 |
| A5-TS-1  | C 6.116064 0.684372 -0.000017<br>C 6.112702 -0.746396 -0.000041<br>C 4.937847 -1.436529 -0.000047<br>H 4.935073 -2.521467 -0.000065<br>C 3.677736 -0.751934 -0.000030<br>C 3.681161 0.700657 -0.000006<br>C 4.944286 1.379707 0.000000<br>H 4.945929 2.464574 0.000018<br>C 1.228322 -0.754703 -0.000019<br>C 0.000000 -1.429539 -0.000024                                                                                                                                                                                                                                                                                                                                                                                                                                                                                                                                                                                                                                                               | A5-TS-2 | C 6.104822 0.657083 -0.000017<br>C 6.093373 -0.773841 -0.000041<br>C 4.916101 -1.459756 -0.000047<br>H 4.909441 -2.544868 -0.000065<br>C 3.657495 -0.772928 -0.000030<br>C 3.673698 0.688042 -0.000006<br>C 4.939590 1.362954 0.000000<br>H 4.946641 2.446454 0.000018<br>C 1.202347 -0.760517 -0.000018<br>C -0.026150 -1.430807 -0.000023                                                                                                                                                                                                                                                                                                                                                                                                                                                                                                                                                                                                                                                                                                                                                                                                                                                                                                        |

|         |                                 |         |                                 |
|---------|---------------------------------|---------|---------------------------------|
|         | C -1.228322 -0.754703 -0.000007 |         | C -1.248094 -0.745337 -0.000007 |
|         | C -1.236551 0.708075 0.000018   |         | C -1.243471 0.709381 0.000017   |
|         | C 0.000000 1.338652 0.000022    |         | C -0.018126 1.388249 0.000023   |
|         | C 1.236551 0.708075 0.000006    |         | C 1.202044 0.702297 0.000006    |
|         | C -2.467721 -1.431085 -0.000012 |         | C -2.489311 -1.419734 -0.000012 |
|         | C -2.475200 1.386691 0.000035   |         | C -2.480085 1.392230 0.000034   |
|         | C -3.681161 0.700657 0.000029   |         | C -3.691498 0.716686 0.000029   |
|         | C -3.677736 -0.751934 0.000005  |         | C -3.696221 -0.736103 0.000005  |
|         | C -4.937847 -1.436529 -0.000001 |         | C -4.960378 -1.413762 0.000000  |
|         | H -4.935073 -2.521467 -0.000019 |         | H -4.963755 -2.498727 -0.000018 |
|         | C -6.112702 -0.746396 0.000016  |         | C -6.131091 -0.716980 0.000017  |
|         | C -6.116064 0.684372 0.000040   |         | C -6.126405 0.714162 0.000040   |
|         | C -4.944287 1.379707 0.000046   |         | C -4.950985 1.402945 0.000046   |
|         | H -2.468123 -2.516912 -0.000030 |         | H -2.493566 -2.505382 -0.000029 |
|         | H 0.000000 -2.514879 -0.000042  |         | H -0.031891 -2.516534 -0.000041 |
|         | H 0.000000 2.840819 0.000049    |         | H -2.476589 2.477809 0.000052   |
|         | H -2.476865 2.470932 0.000052   |         | H -4.946829 2.487888 0.000063   |
|         | H -4.945929 2.464574 0.000064   |         | C 2.455987 1.325198 0.000011    |
|         | C 2.475200 1.386691 0.000011    |         | C 2.441618 -1.441429 -0.000035  |
|         | C 2.467721 -1.431085 -0.000036  |         | H 2.466544 2.828729 0.000037    |
|         | H 2.476865 2.470932 0.000029    |         | H 2.436406 -2.526874 -0.000053  |
|         | H 2.468123 -2.516912 -0.000053  |         | H -7.070643 1.246840 0.000053   |
|         | H -7.063130 1.211936 0.000053   |         | H -7.078872 -1.243362 0.000013  |
|         | H -7.057360 -1.278315 0.000012  |         | H 7.055334 1.178354 -0.000013   |
|         | H 7.063130 1.211936 -0.000013   |         | H 7.035465 -1.310231 -0.000054  |
|         | H 7.057360 -1.278315 -0.000054  |         | H 2.473777 3.679349 0.000053    |
|         | H 0.000000 3.691619 0.000065    |         | H -0.013011 2.472368 0.000040   |
|         | C 6.095922 0.633705 -0.000017   |         | C -6.159601 -0.743069 -0.000017 |
|         | C 6.073880 -0.805092 -0.000041  |         | C -6.168282 0.688467 -0.000041  |
|         | C 4.890072 -1.479191 -0.000047  |         | C -4.999688 1.388159 -0.000047  |
|         | H 4.878082 -2.563913 -0.000065  |         | H -5.005827 2.473122 -0.000066  |
|         | C 3.630892 -0.788533 -0.000030  |         | C -3.733298 0.713855 -0.000030  |
|         | C 3.637208 0.672378 -0.000005   |         | C -3.724458 -0.739387 -0.000005 |
|         | C 4.917192 1.288742 0.000000    |         | C -4.982703 -1.428748 0.000000  |
|         | H 4.975377 2.786886 0.000026    |         | H -4.975897 -2.513698 0.000018  |
|         | C 1.181864 -0.761503 -0.000018  |         | C -1.285485 0.729031 -0.000018  |
|         | C -0.047945 -1.430258 -0.000023 |         | C -0.064957 1.415526 -0.000024  |
|         | C -1.266979 -0.740737 -0.000006 |         | C 1.163132 0.743279 -0.000007   |
|         | C -1.254911 0.713981 0.000017   |         | C 1.172329 -0.711307 0.000018   |
|         | C -0.024616 1.382948 0.000023   |         | C -0.047665 -1.397815 0.000023  |
|         | C 1.193724 0.693390 0.000006    |         | C -1.276486 -0.725759 0.000006  |
|         | C -2.511967 -1.408992 -0.000012 |         | C 2.398215 1.430360 -0.000012   |
|         | C -2.488387 1.403303 0.000034   |         | C 2.416666 -1.382752 0.000035   |
|         | C -3.702635 0.733992 0.000029   |         | C 3.619074 -0.694650 0.000029   |
|         | C -3.714753 -0.719219 0.000005  |         | C 3.612218 0.760576 0.000005    |
|         | C -4.982799 -1.390368 0.000000  |         | C 4.865384 1.462517 -0.000001   |
|         | H -4.991680 -2.475304 -0.000018 |         | H 4.849081 2.547876 -0.000019   |
|         | C -6.149658 -0.687741 0.000017  |         | C 6.054405 0.790280 0.000016    |
|         | C -6.137691 0.743759 0.000040   |         | C 6.017512 -0.625550 0.000039   |
|         | C -4.959120 1.426527 0.000046   |         | C 4.893497 -1.369763 0.000046   |
|         | H -2.521779 -2.494614 -0.000029 |         | H 2.390594 2.515941 -0.000030   |
|         | H -0.057105 -2.515772 -0.000041 |         | H -0.071232 2.501083 -0.000042  |
|         | H -2.479618 2.488915 0.000052   |         | H -0.041277 -2.483335 0.000041  |
|         | H -4.949548 2.511449 0.000063   |         | H 2.424575 -2.468228 0.000053   |
|         | C 2.437253 1.365260 0.000012    |         | H 4.918082 -2.455011 0.000065   |
|         | C 2.415061 -1.453002 -0.000035  |         | C -2.511838 -1.411742 0.000012  |
|         | H 2.449428 2.449525 0.000029    |         | C -2.528834 1.400506 -0.000036  |
|         | H 2.404101 -2.538773 -0.000053  |         | H -2.506030 -2.497390 0.000030  |
|         | H -7.079296 1.281090 0.000053   |         | H -2.535782 2.486163 -0.000054  |
|         | H -7.100177 -1.209162 0.000013  |         | H 7.329085 -1.349970 0.000058   |
|         | H 7.043273 1.162216 -0.000012   |         | H 6.999603 1.321209 0.000011    |
|         | H 7.013949 -1.345855 -0.000055  |         | H -7.102485 -1.278175 -0.000013 |
|         | H 5.040345 3.634877 0.000041    |         | H -7.117551 1.212144 -0.000055  |
|         | H -0.015000 2.468340 0.000040   |         | H 8.070238 -1.763814 0.000068   |
|         | C 6.118197 -0.733838 0.000016   |         | C 6.135335 -0.756334 0.000016   |
|         | C 6.115699 0.696569 0.000040    |         | C 6.136124 0.674529 0.000041    |
|         | C 4.941073 1.387667 0.000046    |         | C 4.966013 1.373664 0.000047    |
|         | H 4.939427 2.472620 0.000065    |         | H 4.972007 2.458808 0.000065    |
|         | C 3.680273 0.704671 0.000029    |         | C 3.699824 0.701688 0.000030    |
|         | C 3.683135 -0.748078 0.000005   |         | C 3.706346 -0.762040 0.000005   |
|         | C 4.945420 -1.428000 -0.000001  |         | C 4.963471 -1.451746 -0.000001  |
|         | H 4.945926 -2.512894 -0.000019  |         | H 4.955384 -2.535195 -0.000019  |
|         | C 1.229767 0.715159 0.000018    |         | C 1.241999 0.710756 0.000018    |
| A5-TS-3 |                                 | A5-TS-4 |                                 |
| A5-P-1  |                                 | A5-P-2  |                                 |

|           |                                 |  |                                 |
|-----------|---------------------------------|--|---------------------------------|
|           | C 0.000003 1.389614 0.000023    |  | C 0.017132 1.387476 0.000023    |
|           | C -1.229772 0.715157 0.000006   |  | C -1.209587 0.709323 0.000006   |
|           | C -1.240675 -0.750000 -0.000019 |  | C -1.216708 -0.745563 -0.000018 |
|           | C 0.000002 -1.358596 -0.000023  |  | C 0.003393 -1.434371 -0.000024  |
|           | C 1.240670 -0.750000 -0.000007  |  | C 1.226859 -0.754895 -0.000007  |
|           | C -2.471359 1.387234 0.000012   |  | C -2.445621 1.392799 0.000012   |
|           | C -2.476196 -1.433308 -0.000036 |  | C -2.458317 -1.418779 -0.000036 |
|           | C -3.683138 -0.748076 -0.000030 |  | C -3.664867 -0.733996 -0.000030 |
|           | C -3.680276 0.704669 -0.000005  |  | C -3.658170 0.718536 -0.000005  |
|           | C -4.941070 1.387666 0.000000   |  | C -4.916767 1.406050 0.000000   |
|           | H -4.939427 2.472618 0.000018   |  | H -4.911706 2.491006 0.000018   |
|           | C -6.115700 0.696566 -0.000017  |  | C -6.093102 0.718421 -0.000017  |
|           | C -6.118199 -0.733835 -0.000041 |  | C -6.099644 -0.712475 -0.000041 |
|           | C -4.945417 -1.427998 -0.000047 |  | C -4.929424 -1.410419 -0.000047 |
|           | H -2.475164 2.473095 0.000030   |  | H -2.441674 2.478457 0.000030   |
|           | H -0.000002 2.474722 0.000042   |  | H 0.017477 2.473246 0.000041    |
|           | H -2.471257 -2.517454 -0.000054 |  | H -2.463083 -2.504355 -0.000054 |
|           | H -4.945927 -2.512892 -0.000066 |  | H -4.933762 -2.495367 -0.000065 |
|           | C 2.476200 -1.433309 -0.000012  |  | C 2.478712 -1.366795 -0.000012  |
|           | C 2.471364 1.387236 0.000035    |  | C 2.488273 1.380133 0.000035    |
|           | H 2.471255 -2.517454 -0.000030  |  | H 2.492613 2.465431 0.000053    |
|           | H 2.475162 2.473096 0.000053    |  | H -7.047990 -1.237810 -0.000054 |
|           | H -7.064820 -1.262217 -0.000055 |  | H -7.036690 1.252302 -0.000012  |
|           | H -7.060686 1.227974 -0.000012  |  | H 7.081252 -1.285783 0.000012   |
|           | H 7.064821 -1.262216 0.000012   |  | H 7.083316 1.201953 0.000054    |
|           | H 7.060688 1.227971 0.000054    |  | H 0.005217 -2.518458 -0.000043  |
| A5-P-3    | C 6.159438 -0.781206 0.000017   |  | C -6.062273 0.689394 0.000016   |
|           | C 6.156948 0.661584 0.000041    |  | C -6.053091 -0.742077 0.000041  |
|           | C 4.983751 1.354991 0.000047    |  | C -4.875695 -1.426955 0.000047  |
|           | H 4.991322 2.439584 0.000065    |  | H -4.868129 -2.511922 0.000065  |
|           | C 3.711970 0.687040 0.000030    |  | C -3.617965 -0.736771 0.000029  |
|           | C 3.692068 -0.775392 0.000005   |  | C -3.627210 0.716407 0.000005   |
|           | C 4.963696 -1.393987 0.000000   |  | C -4.894019 1.389817 -0.000001  |
|           | C 1.262207 0.696046 0.000018    |  | H -4.900898 2.474775 -0.000019  |
|           | C 0.042917 1.384022 0.000023    |  | C -1.170155 -0.720943 0.000017  |
|           | C -1.187205 0.714552 0.000006   |  | C 0.059044 -1.391873 0.000023   |
|           | C -1.198551 -0.740311 -0.000018 |  | C 1.278405 -0.703986 0.000006   |
|           | C 0.020683 -1.429463 -0.000024  |  | C 1.269852 0.750457 -0.000019   |
|           | C 1.250177 -0.759409 -0.000007  |  | C 0.041197 1.421357 -0.000024   |
|           | C -2.420997 1.402761 0.000012   |  | C -1.179153 0.733821 -0.000007  |
|           | C -2.442915 -1.409374 -0.000035 |  | C 2.521902 -1.375605 0.000011   |
|           | C -3.646359 -0.720484 -0.000030 |  | C 2.505768 1.437497 -0.000036   |
|           | C -3.635038 0.732559 -0.000005  |  | C 3.716601 0.764569 -0.000030   |
|           | C -4.891829 1.424225 0.000000   |  | C 3.727972 -0.691447 -0.000006  |
|           | H -4.883134 2.509179 0.000018   |  | C 4.987689 -1.382388 0.000000   |
|           | C -6.069990 0.740545 -0.000017  |  | H 4.981893 -2.468019 0.000019   |
|           | C -6.081143 -0.690884 -0.000041 |  | C 6.173157 -0.699648 -0.000016  |
|           | C -4.913702 -1.392691 -0.000047 |  | C 6.101797 0.709306 -0.000040   |
|           | H -2.413369 2.488419 0.000030   |  | C 4.985852 1.456620 -0.000047   |
|           | H 0.051229 2.469617 0.000041    |  | H 2.527411 -2.461208 0.000029   |
|           | H -2.452173 -2.495044 -0.000053 |  | H 0.066609 -2.477449 0.000041   |
|           | H -4.921732 -2.477635 -0.000065 |  | H 0.033835 2.506877 -0.000042   |
|           | C 2.482180 -1.451469 -0.000013  |  | H 2.500246 2.522933 -0.000054   |
|           | C 2.505393 1.369051 0.000035    |  | H 5.000736 2.541808 -0.000065   |
|           | H 2.482062 -2.535674 -0.000031  |  | C -2.423072 1.404035 -0.000013  |
|           | H 2.510693 2.454886 0.000053    |  | C -2.404814 -1.408119 0.000035  |
|           | H -7.031243 -1.213043 -0.000054 |  | H -2.431031 2.489677 -0.000031  |
|           | H -7.011861 1.277422 -0.000012  |  | H -2.397988 -2.493794 0.000053  |
|           | H 7.097194 -1.325871 0.000012   |  | H 7.124050 -1.219527 -0.000012  |
|           | H 7.105974 1.186901 0.000055    |  | H -7.011774 1.212686 0.000012   |
|           | H 0.012848 -2.514986 -0.000042  |  | H -6.995699 -1.277660 0.000054  |
| A5-p      | C -0.722534 0.782028 -0.055369  |  | C -0.718414 0.811915 -0.047796  |
|           | C -1.365435 2.017765 -0.331991  |  | C -1.366202 2.049633 -0.301557  |
|           | C -0.648498 3.239917 -0.209218  |  | C -0.643916 3.268375 -0.179652  |
|           | C 0.648071 3.240033 0.208205    |  | C 0.662112 3.259777 0.208572    |
|           | C 1.365144 2.017989 0.331257    |  | C 1.378284 2.035172 0.308780    |
|           | C 0.722417 0.782120 0.054790    |  | C 0.725402 0.803200 0.040708    |
|           | C 1.584915 -0.368357 -0.189052  |  | C 1.570939 -0.355236 -0.214422  |
|           | C 2.961155 -0.305793 0.188237   |  | C 2.952668 -0.302545 0.140225   |
|           | C 2.747904 2.045809 0.694593    |  | C 2.768502 2.054184 0.642873    |
|           | C 3.501946 0.916458 0.691408    |  | C 3.512735 0.918440 0.625671    |
|           | C 1.165525 -1.512837 -0.912325  |  | C 1.125414 -1.502507 -0.914628  |
|           | C 3.800994 -1.424421 -0.026885  |  | C 3.776465 -1.432913 -0.072811  |
| A5-p-TS-1 |                                 |  |                                 |

|           |                                                                                                                                                                                                                                                                                                                                                                                                                                                                                                                                                                                                                                                                                                                                                                                                                                                                                                                                                                                                                                                                                                                                                                                                                                                                                         |          |                                                                                                                                                                                                                                                                                                                                                                                                                                                                                                                                                                                                                                                                                                                                                                                                                                                                                                                                                                                                                                                                                                                                                                                                                     |
|-----------|-----------------------------------------------------------------------------------------------------------------------------------------------------------------------------------------------------------------------------------------------------------------------------------------------------------------------------------------------------------------------------------------------------------------------------------------------------------------------------------------------------------------------------------------------------------------------------------------------------------------------------------------------------------------------------------------------------------------------------------------------------------------------------------------------------------------------------------------------------------------------------------------------------------------------------------------------------------------------------------------------------------------------------------------------------------------------------------------------------------------------------------------------------------------------------------------------------------------------------------------------------------------------------------------|----------|---------------------------------------------------------------------------------------------------------------------------------------------------------------------------------------------------------------------------------------------------------------------------------------------------------------------------------------------------------------------------------------------------------------------------------------------------------------------------------------------------------------------------------------------------------------------------------------------------------------------------------------------------------------------------------------------------------------------------------------------------------------------------------------------------------------------------------------------------------------------------------------------------------------------------------------------------------------------------------------------------------------------------------------------------------------------------------------------------------------------------------------------------------------------------------------------------------------------|
|           | H 4.834819 -1.363697 0.297018<br>C 3.338115 -2.547735 -0.671797<br>C 2.014412 -2.572231 -1.148538<br>C -1.584883 -0.368428 0.189022<br>C -2.748250 2.045330 -0.695152<br>H -3.182316 2.998531 -0.977875<br>C -3.502163 0.915893 -0.691578<br>C -2.961179 -0.306147 -0.188091<br>C -3.800842 -1.424803 0.027540<br>C -1.165223 -1.512590 0.912625<br>H -4.834727 -1.364329 -0.296219<br>C -3.337716 -2.547840 0.672771<br>C -2.013936 -2.572018 1.149318<br>H 4.543492 0.942176 0.993368<br>H 3.181812 2.999124 0.977170<br>H 1.172259 4.171184 0.394292<br>H -1.172814 4.170975 -0.395408<br>H -4.543756 0.941421 -0.993391<br>H -3.994977 -3.392545 0.845157<br>H -1.658839 -3.424840 1.716783<br>H 1.659514 -3.425277 -1.715792<br>H 3.995510 -3.392411 -0.843814<br>H -0.159679 -1.550328 1.305452<br>H 0.160080 -1.550830 -1.305356                                                                                                                                                                                                                                                                                                                                                                                                                                                 |          | H 4.816100 -1.379958 0.233260<br>C 3.288523 -2.561371 -0.690286<br>C 1.957760 -2.576620 -1.145961<br>C -1.577709 -0.340446 0.182826<br>C -2.752202 2.078960 -0.651785<br>H -3.191107 3.035800 -0.913788<br>C -3.503134 0.947080 -0.672193<br>C -2.959142 -0.285509 -0.198965<br>C -3.786067 -1.421984 -0.024751<br>C -1.200728 -1.502339 0.876730<br>H -4.817043 -1.362993 -0.356874<br>C -3.321013 -2.561379 0.590790<br>C -2.003077 -2.584641 1.098329<br>H 4.560017 0.936421 0.907771<br>H 3.215303 3.004124 0.916364<br>H 1.193293 4.188027 0.389279<br>H -1.168074 4.202903 -0.347604<br>H -4.544483 0.975673 -0.974680<br>H -3.970713 -3.418553 0.729183<br>H -1.645496 -3.433300 1.671649<br>H 1.584211 -3.433861 -1.694613<br>H 3.932313 -3.417249 -0.858314<br>H 0.117927 -1.531358 -1.301437<br>H -0.014605 -1.542358 1.700840<br>H 0.609162 -1.618803 2.294785                                                                                                                                                                                                                                                                                                                                           |
| A5-p-TS-2 | C 0.746417 0.799919 0.054233<br>C 1.407338 2.018595 0.361049<br>C 0.710262 3.254432 0.261724<br>C -0.584621 3.285382 -0.159533<br>C -1.321294 2.078110 -0.310828<br>C -0.697812 0.826453 -0.061658<br>C -1.578933 -0.313548 0.156517<br>C -2.956552 -0.222473 -0.215656<br>C -2.702823 2.135982 -0.673700<br>C -3.475816 1.019660 -0.692927<br>C -1.174962 -1.484870 0.858826<br>C -3.823664 -1.326333 -0.024099<br>H -4.856636 -1.235075 -0.345309<br>C -3.389161 -2.482163 0.592220<br>C -2.069837 -2.496486 1.038322<br>C 1.590290 -0.359415 -0.209724<br>C 2.788362 2.015976 0.731598<br>H 3.236628 2.955660 1.036390<br>C 3.523103 0.874162 0.708768<br>C 2.964927 -0.328056 0.177321<br>C 3.786906 -1.456201 -0.055784<br>C 1.156112 -1.480954 -0.959765<br>H 4.819339 -1.420241 0.275986<br>C 3.308922 -2.557732 -0.726625<br>C 1.988342 -2.549655 -1.212368<br>H -4.516706 1.069762 -0.993590<br>H -3.121255 3.101680 -0.936455<br>H -1.092822 4.228857 -0.326543<br>H 1.248859 4.172557 0.470002<br>H 4.563078 0.875854 1.017039<br>H 3.952461 -3.410277 -0.911355<br>H 1.622790 -3.384974 -1.798743<br>H -4.054189 -3.324268 0.746774<br>H 0.153185 -1.493442 -1.360927<br>H -0.173512 -1.558494 1.259758<br>H -1.605978 -3.701384 1.800732<br>H -1.348279 -4.380925 2.238776 | A5-p-P-1 | C 0.742726 0.782975 0.120975<br>C 1.440731 2.005316 0.307383<br>C 0.747457 3.244260 0.231529<br>C -0.572136 3.275919 -0.103660<br>C -1.318617 2.071904 -0.223996<br>C -0.701380 0.819285 0.031773<br>C -1.580189 -0.328883 0.199626<br>C -2.937228 -0.241893 -0.235488<br>C -2.695509 2.132965 -0.605952<br>C -3.456003 1.010876 -0.684420<br>C -1.199805 -1.505280 0.893565<br>C -3.783965 -1.369855 -0.126400<br>H -4.801325 -1.290009 -0.495036<br>C -3.350275 -2.529743 0.475082<br>C -2.058627 -2.577900 1.026876<br>C 1.550660 -0.406765 -0.102687<br>C 2.857218 2.011516 0.504622<br>H 3.337063 2.962727 0.709334<br>C 3.595680 0.875146 0.414726<br>C 2.977137 -0.359202 0.054266<br>C 3.752654 -1.517835 -0.197990<br>C 1.067540 -1.625974 -0.577003<br>H 4.826194 -1.457199 -0.055062<br>C 3.180655 -2.690913 -0.636912<br>C 1.780334 -2.751899 -0.842602<br>H -4.487260 1.059862 -1.017253<br>H -3.113192 3.102519 -0.855535<br>H -1.082597 4.220470 -0.257900<br>H 1.305943 4.162645 0.376323<br>H 4.670264 0.897740 0.562183<br>H 3.794506 -3.563000 -0.835549<br>H 1.308774 -3.659813 -1.203019<br>H -1.737279 -3.454292 1.578196<br>H -4.013711 -3.382508 0.564307<br>H -0.241730 -1.543270 1.389136 |
| A5-p-P-2  | C -0.704086 0.768089 -0.052382<br>C -1.328849 2.016506 -0.311576<br>C -0.593275 3.226138 -0.173878<br>C 0.704513 3.202225 0.238740<br>C 1.404768 1.968554 0.342131<br>C 0.741031 0.745922 0.054119<br>C 1.585048 -0.411975 -0.209268<br>C 2.968120 -0.376142 0.154592<br>C 2.789667 1.972132 0.695931<br>C 3.528054 0.832807 0.669797                                                                                                                                                                                                                                                                                                                                                                                                                                                                                                                                                                                                                                                                                                                                                                                                                                                                                                                                                   | A5-a     | C -3.652531 1.724671 -0.000049<br>C -3.715639 0.288279 -0.000016<br>C -4.960989 -0.374421 0.000014<br>C -1.222406 1.658919 -0.000055<br>C 0.000003 2.333022 -0.000057<br>C 1.222410 1.658920 -0.000034<br>C 1.229744 0.226913 -0.000010<br>C 0.000003 -0.439104 0.000003<br>C -1.229742 0.226911 -0.000023<br>C 2.466284 2.377602 -0.000024                                                                                                                                                                                                                                                                                                                                                                                                                                                                                                                                                                                                                                                                                                                                                                                                                                                                         |

|           |                                                                                                                                                                                                                                                                                                                                                                                                                                                                                                                                                                                                                                                                                                                                                                                                                                                                                                                                                                                                                                                                                                                                                                                                                                                                                      |           |                                                                                                                                                                                                                                                                                                                                                                                                                                                                                                                                                                                                                                                                                                                                                                                                                                                                                                                                                                                                                                                                                                                                                                                                                                                                                          |
|-----------|--------------------------------------------------------------------------------------------------------------------------------------------------------------------------------------------------------------------------------------------------------------------------------------------------------------------------------------------------------------------------------------------------------------------------------------------------------------------------------------------------------------------------------------------------------------------------------------------------------------------------------------------------------------------------------------------------------------------------------------------------------------------------------------------------------------------------------------------------------------------------------------------------------------------------------------------------------------------------------------------------------------------------------------------------------------------------------------------------------------------------------------------------------------------------------------------------------------------------------------------------------------------------------------|-----------|------------------------------------------------------------------------------------------------------------------------------------------------------------------------------------------------------------------------------------------------------------------------------------------------------------------------------------------------------------------------------------------------------------------------------------------------------------------------------------------------------------------------------------------------------------------------------------------------------------------------------------------------------------------------------------------------------------------------------------------------------------------------------------------------------------------------------------------------------------------------------------------------------------------------------------------------------------------------------------------------------------------------------------------------------------------------------------------------------------------------------------------------------------------------------------------------------------------------------------------------------------------------------------------|
|           | C 1.139191 -1.549217 -0.947541<br>C 3.802866 -1.496635 -0.080981<br>H 4.840319 -1.445585 0.235096<br>C 3.332702 -2.622308 -0.731572<br>C 2.012315 -2.567186 -1.154858<br>C -1.582026 -0.372957 0.177669<br>C -2.711648 2.069497 -0.671563<br>H -3.132218 3.032663 -0.940304<br>C -3.481636 0.950900 -0.682671<br>C -2.957739 -0.285678 -0.197239<br>C -3.812840 -1.395201 0.003698<br>C -1.178080 -1.532546 0.885350<br>H -4.845956 -1.315844 -0.318232<br>C -3.364877 -2.533553 0.632674<br>C -2.041437 -2.583118 1.107802<br>H 4.572116 0.841121 0.963396<br>H 3.239266 2.914888 0.988615<br>H 1.242736 4.123101 0.435118<br>H -1.104432 4.167215 -0.345566<br>H -4.523047 0.995517 -0.982673<br>H -4.033545 -3.371524 0.793235<br>H -1.697734 -3.449054 1.662082<br>H 3.971050 -3.478085 -0.917672<br>H -0.173180 -1.590120 1.277345<br>H 0.133924 -1.581821 -1.344300                                                                                                                                                                                                                                                                                                                                                                                                            |           | C 2.512775 -0.473121 0.000018<br>C 3.715642 0.288276 0.000031<br>C 3.652536 1.724670 0.000010<br>C 4.960988 -0.374427 0.000062<br>H 2.432807 3.461966 -0.000040<br>H 0.000003 3.418779 -0.000073<br>H 0.000005 -1.518859 0.000048<br>C -2.512774 -0.473120 -0.000013<br>C -2.466278 2.377602 -0.000071<br>H -2.432800 3.461966 -0.000100<br>C -5.036131 -1.751898 0.000048<br>C -2.623494 -1.879509 -0.000008<br>C 2.623486 -1.879506 0.000030<br>C 5.036124 -1.751906 0.000064<br>H -1.731694 -2.492719 -0.000036<br>H 6.000073 -2.247749 0.000072<br>C -3.854317 -2.507924 0.000022<br>C 3.854310 -2.507927 0.000044<br>H -4.585638 2.278218 -0.000064<br>H -5.867167 0.222484 0.000007<br>H -6.000081 -2.247738 0.000095<br>H -3.904424 -3.590931 0.000020<br>H 1.731683 -2.492713 0.000005<br>H 3.904408 -3.590934 0.000043<br>H 5.867170 0.222473 0.000072<br>H 4.585644 2.278214 0.000025                                                                                                                                                                                                                                                                                                                                                                                          |
| A5-a-TS-1 | C -3.654540 1.741812 0.026715<br>C -3.722572 0.305986 0.033341<br>C -4.968667 -0.353954 0.038272<br>C -1.224014 1.671605 -0.037725<br>C 0.000001 2.342766 -0.053966<br>C 1.224016 1.671606 -0.037729<br>C 1.240352 0.234393 0.016187<br>C 0.000001 -0.391363 0.086464<br>C -1.240351 0.234392 0.016188<br>C 2.467560 2.390947 -0.029620<br>C 2.523020 -0.460081 0.000793<br>C 3.722573 0.305986 0.033336<br>C 3.654542 1.741812 0.026703<br>C 4.968668 -0.353956 0.038267<br>H 2.431228 3.474938 -0.056701<br>H 0.000000 3.428070 -0.069026<br>C -2.523019 -0.460081 0.000790<br>C -2.467558 2.390947 -0.029610<br>H -2.431226 3.474938 -0.056689<br>C -5.045885 -1.731092 -0.009661<br>C -2.633891 -1.863772 -0.084229<br>C 2.633889 -1.863773 -0.084215<br>C 5.045884 -1.731095 -0.009657<br>H -1.741308 -2.466218 -0.170517<br>H 6.010988 -2.224753 -0.008514<br>C -3.867453 -2.488158 -0.082543<br>C 3.867451 -2.488160 -0.082528<br>H -4.585279 2.298818 0.047625<br>H -5.873619 0.243826 0.070592<br>H -6.010990 -2.224750 -0.008520<br>H -3.921692 -3.568860 -0.148974<br>H 1.741305 -2.466219 -0.170493<br>H 3.921689 -3.568862 -0.148949<br>H 5.873620 0.243824 0.070581<br>H 4.585281 2.298817 0.047609<br>H 0.000009 -1.657082 0.715063<br>H -0.000036 -2.367093 1.233485 | A5-a-TS-2 | C -3.636124 -1.765242 -0.000043<br>C -3.708018 -0.329178 -0.000023<br>C -4.957002 0.328332 -0.000035<br>C -1.205196 -1.690930 -0.000012<br>C 0.019618 -2.360394 -0.000014<br>C 1.238946 -1.680382 -0.000008<br>C 1.240658 -0.248275 -0.000003<br>C 0.009326 0.415060 0.000001<br>C -1.214852 -0.259607 0.000003<br>C 2.485952 -2.393880 -0.000010<br>C 2.520374 0.457336 -0.000003<br>C 3.726258 -0.298632 -0.000004<br>C 3.669078 -1.735358 -0.000008<br>C 4.968613 0.369617 -0.000003<br>H 2.457366 -3.478368 -0.000013<br>H 0.024133 -3.446073 -0.000024<br>H -0.002679 1.493431 0.000003<br>C -2.498128 0.434466 0.000011<br>C -2.446943 -2.412783 -0.000033<br>H -2.410300 -3.496997 -0.000045<br>C -5.048251 1.704850 -0.000009<br>C -2.667783 1.823947 0.000043<br>C 2.622802 1.864406 -0.000001<br>C 5.036455 1.747436 -0.000001<br>H 5.997894 2.248170 0.000000<br>C -3.870845 2.476890 0.000043<br>C 3.850927 2.497948 0.000000<br>H -4.567066 -2.322425 -0.000066<br>H -5.858040 -0.275711 -0.000064<br>H -6.016294 2.193422 -0.000018<br>H -3.917690 3.560463 0.000088<br>H 1.727500 2.472507 0.000000<br>H 3.896073 3.581131 0.000002<br>H 5.877706 -0.222824 -0.000004<br>H 4.604594 -2.284876 -0.000009<br>H -1.582048 2.816366 0.000205<br>H -1.046340 3.488029 0.000600 |
| A5-a-TS-3 | C 3.595018 -1.816767 -0.000039<br>C 3.682669 -0.381171 -0.000027<br>C 4.943694 0.254273 -0.000030<br>C 1.166150 -1.712308 -0.000022<br>C -0.067444 -2.365711 -0.000020<br>C -1.278200 -1.670963 -0.000006<br>C -1.262421 -0.238879 0.000006<br>C -0.022113 0.406725 0.000004<br>C 1.195687 -0.280718 -0.000010<br>C -2.533816 -2.369139 -0.000004                                                                                                                                                                                                                                                                                                                                                                                                                                                                                                                                                                                                                                                                                                                                                                                                                                                                                                                                    | A5-a-P-1  | C -3.662428 1.706003 -0.000043<br>C -3.715561 0.268136 -0.000022<br>C -4.945587 -0.422313 -0.000019<br>C -1.226237 1.676891 -0.000030<br>C 0.000000 2.349571 -0.000034<br>C 1.226237 1.676891 -0.000018<br>C 1.239949 0.236278 0.000004<br>C 0.000000 -0.362889 0.000006<br>C -1.239949 0.236278 -0.000009<br>C 2.482721 2.374875 -0.000023                                                                                                                                                                                                                                                                                                                                                                                                                                                                                                                                                                                                                                                                                                                                                                                                                                                                                                                                              |

|          |                                                                                                                                                                                                                                                                                                                                                                                                                                                                                                                                                                                                                                                                                                                                                                                                                                                                                                                                                                                                                                                                                                                                                                                                                   |           |                                                                                                                                                                                                                                                                                                                                                                                                                                                                                                                                                                                                                                                                                                                                                                                                                                                                                                                                                                                                                                                                                                                                                                                                                   |
|----------|-------------------------------------------------------------------------------------------------------------------------------------------------------------------------------------------------------------------------------------------------------------------------------------------------------------------------------------------------------------------------------------------------------------------------------------------------------------------------------------------------------------------------------------------------------------------------------------------------------------------------------------------------------------------------------------------------------------------------------------------------------------------------------------------------------------------------------------------------------------------------------------------------------------------------------------------------------------------------------------------------------------------------------------------------------------------------------------------------------------------------------------------------------------------------------------------------------------------|-----------|-------------------------------------------------------------------------------------------------------------------------------------------------------------------------------------------------------------------------------------------------------------------------------------------------------------------------------------------------------------------------------------------------------------------------------------------------------------------------------------------------------------------------------------------------------------------------------------------------------------------------------------------------------------------------------------------------------------------------------------------------------------------------------------------------------------------------------------------------------------------------------------------------------------------------------------------------------------------------------------------------------------------------------------------------------------------------------------------------------------------------------------------------------------------------------------------------------------------|
|          | C -2.533651 0.482418 0.000021<br>C -3.748531 -0.259133 0.000022<br>C -3.708853 -1.696476 0.000009<br>C -4.982897 0.423736 0.000036<br>H -2.518278 -3.453862 -0.000014<br>H -0.085797 -3.451248 -0.000029<br>H -0.003917 1.486440 0.000012<br>C 2.489301 0.397220 -0.000013<br>C 2.398422 -2.450331 -0.000036<br>H 2.348060 -3.533949 -0.000045<br>C 5.054763 1.634148 -0.000019<br>C 2.620320 1.808192 -0.000002<br>C -2.620755 1.890436 0.000034<br>C -5.035146 1.802215 0.000049<br>H 1.746189 2.447534 0.000009<br>H -5.990695 2.314004 0.000060<br>C 3.870792 2.359795 -0.000006<br>C -3.841078 2.538841 0.000048<br>H 4.518617 -2.385757 -0.000050<br>H 5.837684 -0.361625 -0.000041<br>H 6.023424 2.120871 -0.000022<br>H -1.719152 2.489136 0.000034<br>H -3.873533 3.622464 0.000058<br>H -5.898732 -0.158174 0.000037<br>H -4.650957 -2.234543 0.000010<br>H 3.964072 3.856617 0.000007<br>H 4.011567 4.703670 0.000013                                                                                                                                                                                                                                                                                  |           | C 2.505983 -0.475969 0.000020<br>C 3.715561 0.268136 0.000014<br>C 3.662428 1.706003 -0.000007<br>C 4.945587 -0.422313 0.000030<br>H 2.465688 3.459811 -0.000039<br>H 0.000000 3.434893 -0.000051<br>C -2.505983 -0.475969 -0.000006<br>C -2.482721 2.374875 -0.000047<br>H -2.465687 3.459811 -0.000063<br>C -4.985031 -1.802504 0.000001<br>C -2.571162 -1.882767 0.000015<br>C 2.571162 -1.882767 0.000041<br>C 4.985031 -1.802504 0.000051<br>H -1.646413 -2.448714 0.000028<br>H 5.937796 -2.319682 0.000063<br>C -3.787867 -2.537155 0.000018<br>C 3.787867 -2.537155 0.000057<br>H -4.599801 2.252382 -0.000056<br>H -5.867033 0.150694 -0.000031<br>H -5.937796 -2.319682 0.000004<br>H -3.818921 -3.620840 0.000034<br>H 1.646413 -2.448714 0.000045<br>H 3.818921 -3.620840 0.000073<br>H 5.867033 0.150694 0.000026<br>H 4.599801 2.252382 -0.000012                                                                                                                                                                                                                                                                                                                                                   |
| A5-a-P-2 | C -3.679999 1.694800 -0.000047<br>C -3.733715 0.257257 -0.000021<br>C -4.959754 -0.443459 -0.000013<br>C -1.242176 1.658174 -0.000036<br>C -0.019319 2.331536 -0.000042<br>C 1.201571 1.651619 -0.000025<br>C 1.211835 0.217610 0.000001<br>C -0.016995 -0.448652 0.000008<br>C -1.237289 0.229795 -0.000010<br>C 2.446224 2.369448 -0.000031<br>C 2.494901 -0.480862 0.000019<br>C 3.697289 0.280607 0.000012<br>C 3.632822 1.716867 -0.000013<br>C 4.942388 -0.382494 0.000030<br>H 2.413140 3.453826 -0.000050<br>H -0.014728 3.417235 -0.000061<br>H -0.050157 -1.530539 0.000028<br>C -2.506662 -0.475674 -0.000003<br>C -2.497595 2.359054 -0.000054<br>H -2.478969 3.443826 -0.000074<br>C -5.004273 -1.824296 0.000011<br>C -2.642399 -1.858585 0.000023<br>C 2.603203 -1.887343 0.000042<br>C 5.016097 -1.760112 0.000054<br>H 5.979751 -2.256570 0.000068<br>C -3.803300 -2.570578 0.000032<br>C 3.833934 -2.515882 0.000060<br>H -4.617012 2.241953 -0.000061<br>H -5.882711 0.126408 -0.000028<br>H -5.957158 -2.342455 0.000016<br>H -3.820927 -3.654745 0.000051<br>H 1.709741 -2.498046 0.000047<br>H 3.883853 -3.598871 0.000078<br>H 5.849058 0.213657 0.000025<br>H 4.565390 2.271346 -0.000018 | A5-a-P-3  | C -3.700216 1.647439 -0.000044<br>C -3.745745 0.209750 -0.000019<br>C -4.988694 -0.460864 -0.000012<br>C -1.269712 1.616053 -0.000034<br>C -0.055755 2.305390 -0.000040<br>C 1.175143 1.646915 -0.000023<br>C 1.201873 0.214888 0.000001<br>C -0.018818 -0.466956 0.000008<br>C -1.256497 0.184060 -0.000010<br>C 2.409428 2.382000 -0.000028<br>C 2.493972 -0.468256 0.000018<br>C 3.686421 0.309158 0.000014<br>C 3.604045 1.744575 -0.000010<br>C 4.940557 -0.336650 0.000031<br>H 2.361737 3.465783 -0.000046<br>H -0.069568 3.391006 -0.000058<br>H -0.005457 -1.546783 0.000028<br>C -2.528777 -0.532166 -0.000003<br>C -2.523295 2.316988 -0.000051<br>H -2.505606 3.401586 -0.000069<br>C -5.063341 -1.845777 0.000009<br>C -2.616376 -1.949385 0.000020<br>C 2.623275 -1.872960 0.000038<br>C 5.034016 -1.712999 0.000052<br>H -1.724983 -2.564108 0.000032<br>H 6.004460 -2.195937 0.000066<br>C -3.853695 -2.517544 0.000025<br>C 3.862454 -2.484754 0.000055<br>H -4.640257 2.188865 -0.000056<br>H -5.900155 0.129148 -0.000025<br>H -6.017078 -2.360416 0.000015<br>H 1.739979 -2.498341 0.000040<br>H 3.926996 -3.566955 0.000071<br>H 5.838650 0.272298 0.000028<br>H 4.529722 2.310429 -0.000013 |
| A2R5     | C -2.386699 0.320693 0.000046<br>C -1.160109 0.949932 0.000238<br>C 0.000000 0.140288 0.000022<br>C -0.000002 -1.253900 -0.000208<br>C -1.281320 -1.877466 -0.000376<br>C -2.425544 -1.102630 -0.000279<br>H -3.317313 0.878559 0.000195<br>C 1.160112 0.949933 0.000075<br>C 1.281322 -1.877467 -0.000245<br>H -1.358948 -2.959622 -0.000586<br>H -3.393152 -1.592278 -0.000403                                                                                                                                                                                                                                                                                                                                                                                                                                                                                                                                                                                                                                                                                                                                                                                                                                  | A2R5-TS-1 | C 2.345714 -0.418349 0.000027<br>C 1.347950 0.530912 0.000032<br>C -0.001366 0.089982 0.000001<br>C -0.393115 -1.248367 -0.000033<br>C 0.658947 -2.208659 -0.000037<br>C 1.976962 -1.792650 -0.000008<br>H 3.394880 -0.144536 0.000049<br>C -0.889200 1.194167 0.000012<br>C -1.798730 -1.486546 -0.000059<br>H 0.425444 -3.268102 -0.000063<br>H 2.764773 -2.537550 -0.000012                                                                                                                                                                                                                                                                                                                                                                                                                                                                                                                                                                                                                                                                                                                                                                                                                                    |

|           |                                                                                                                                                                                                                                                                                                                                                                                                                                                                                                                                                                                                                                                                                                                             |           |                                                                                                                                                                                                                                                                                                                                                                                                                                                                                                                                                                                                                                                                                                                               |
|-----------|-----------------------------------------------------------------------------------------------------------------------------------------------------------------------------------------------------------------------------------------------------------------------------------------------------------------------------------------------------------------------------------------------------------------------------------------------------------------------------------------------------------------------------------------------------------------------------------------------------------------------------------------------------------------------------------------------------------------------------|-----------|-------------------------------------------------------------------------------------------------------------------------------------------------------------------------------------------------------------------------------------------------------------------------------------------------------------------------------------------------------------------------------------------------------------------------------------------------------------------------------------------------------------------------------------------------------------------------------------------------------------------------------------------------------------------------------------------------------------------------------|
|           | C 2.425542 -1.102633 -0.000084<br>C 2.386698 0.320695 0.000066<br>H 1.358946 -2.959623 -0.000391<br>H 3.393152 -1.592277 -0.000119<br>H 3.317316 0.878555 0.000100<br>C 0.680573 2.342157 0.000012<br>C -0.680572 2.342156 0.000741<br>H 1.314982 3.218073 0.001230<br>H -1.314982 3.218072 -0.000077                                                                                                                                                                                                                                                                                                                                                                                                                       |           | C -2.678682 -0.422037 -0.000050<br>C -2.242401 0.934075 -0.000014<br>H -2.176544 -2.503466 -0.000086<br>H -3.744904 -0.619746 -0.000070<br>H -2.978821 1.730578 -0.000009<br>C -0.040892 2.407144 0.000051<br>C 1.245307 1.991152 0.000062<br>H -0.399095 3.426960 0.000068<br>H 2.451725 2.974649 0.000103<br>H 3.079577 3.516268 0.000125                                                                                                                                                                                                                                                                                                                                                                                   |
| A2R5-TS-2 | C -2.309346 0.038043 0.000019<br>C -1.195235 0.827886 0.000154<br>C 0.043568 0.128615 0.000025<br>C 0.182015 -1.259545 -0.000223<br>C -1.024560 -2.018863 -0.000351<br>C -2.248663 -1.369615 -0.000231<br>C 1.114566 1.052640 0.000182<br>C 1.520354 -1.748980 -0.000318<br>H -0.987015 -3.103376 -0.000543<br>H -3.166801 -1.947219 -0.000329<br>C 2.580894 -0.862744 -0.000167<br>C 2.398294 0.548474 0.000084<br>H 1.706585 -2.817655 -0.000509<br>H 3.592747 -1.252370 -0.000242<br>H 3.267538 1.197838 0.000194<br>C 0.499868 2.389167 0.000419<br>C -0.855073 2.258610 0.000403<br>H 1.044757 3.323200 0.000580<br>H -1.574594 3.065049 0.000547<br>H -3.667805 0.651441 0.000130<br>H -4.455502 0.980960 0.000188    | A2R5-TS-3 | C 2.252219 0.725359 -0.000040<br>C 0.933887 1.144058 -0.000145<br>C -0.080484 0.154704 -0.000026<br>C 0.137282 -1.223967 0.000192<br>C 1.506602 -1.642661 0.000298<br>C 2.463973 -0.666879 0.000178<br>H 3.088740 1.416533 -0.000120<br>C -1.354661 0.768836 -0.000160<br>C -1.029054 -2.042253 0.000281<br>H 1.767679 -2.696131 0.000468<br>C -2.280818 -1.456863 0.000151<br>C -2.466685 -0.045523 -0.000072<br>H -0.934895 -3.122829 -0.000448<br>H -3.158889 -2.093230 0.000220<br>H -3.473281 0.359071 -0.000166<br>C -1.105946 2.220466 -0.000374<br>C 0.236655 2.441467 -0.000365<br>H -1.873805 2.982074 -0.000515<br>H 0.722534 3.407401 -0.000497<br>H 3.888110 -1.125442 0.000294<br>H 4.695990 -1.387911 0.000362 |
| A2R5-TS-4 | C 2.243211 0.864991 0.000012<br>C 0.909870 1.216411 -0.000130<br>C -0.059362 0.184438 -0.000029<br>C 0.221532 -1.187081 0.000207<br>C 1.604394 -1.476288 0.000341<br>C 2.585181 -0.523170 0.000255<br>H 3.035131 1.606932 -0.000054<br>C -1.362640 0.735905 -0.000208<br>C -0.902150 -2.061922 0.000269<br>H 3.631399 -0.810907 0.000370<br>C -2.179029 -1.534369 0.000097<br>C -2.432412 -0.133299 -0.000145<br>H -0.754437 -3.135583 0.000449<br>H -3.026045 -2.211332 0.000146<br>H -3.457719 0.221335 -0.000274<br>C -1.180900 2.197223 -0.000433<br>C 0.150555 2.478418 -0.000386<br>H -1.983080 2.922505 -0.000606<br>H 0.590052 3.466516 -0.000517<br>H 2.049193 -2.912330 0.000612<br>H 2.326006 -3.714678 0.000770 | A2R5-P-1  | C 2.367856 0.595989 0.000016<br>C 1.086983 1.100599 -0.000132<br>C -0.000726 0.185902 -0.000033<br>C 0.139511 -1.201419 0.000202<br>C 1.475240 -1.695987 0.000349<br>C 2.541190 -0.815990 0.000257<br>H 3.236191 1.245122 -0.000049<br>C -1.239478 0.875978 -0.000202<br>C -1.073745 -1.950936 0.000266<br>H 1.656253 -2.765642 0.000534<br>H 3.550849 -1.211064 0.000371<br>C -2.288715 -1.295213 0.000102<br>C -2.394766 0.126031 -0.000134<br>H -1.041221 -3.035262 0.000445<br>H -3.202617 -1.878972 0.000155<br>H -3.376799 0.586744 -0.000252<br>C -0.912392 2.322958 -0.000414<br>C 0.433246 2.406523 -0.000381<br>H -1.627880 3.132463 -0.000576                                                                      |
| A2R5-P-2  | C 2.318022 0.611066 0.000110<br>C 1.063708 1.137073 0.000028<br>C 0.023658 0.160850 0.000019<br>C 0.216198 -1.221509 0.000159<br>C 1.566418 -1.680181 0.000273<br>C 2.606972 -0.762285 0.000227<br>C -1.234768 0.807029 -0.000185<br>C -0.969295 -2.011318 0.000171<br>H 1.782866 -2.743617 0.000376<br>H 3.635265 -1.106956 0.000300<br>C -2.209304 -1.399946 0.000014<br>C -2.363754 0.013666 -0.000183<br>H -0.898795 -3.093838 0.000292<br>H -3.100695 -2.017271 0.000015<br>H -3.361199 0.440775 -0.000341<br>C -0.954084 2.249888 -0.000407<br>C 0.393548 2.444791 -0.000018<br>H -1.704447 3.028461 -0.000686<br>H 0.903101 3.397705 -0.001216                                                                       | A2R5-P-3  | C -2.461045 -0.149913 -0.000043<br>C -1.360051 0.691696 0.000047<br>C -0.069736 0.104710 -0.000005<br>C 0.196250 -1.266143 -0.000198<br>C -0.950332 -2.129993 -0.000328<br>C -2.168467 -1.521611 -0.000232<br>H -3.482753 0.214803 -0.000018<br>C 0.919717 1.115412 0.000192<br>C 1.571295 -1.637716 -0.000243<br>H -0.838433 -3.209272 -0.000472<br>C 2.548814 -0.660661 -0.000081<br>C 2.242869 0.729304 0.000149<br>H 1.851015 -2.685723 -0.000402<br>H 3.591069 -0.960275 -0.000113<br>H 3.051052 1.452994 0.000296<br>C 0.192812 2.396467 0.000447<br>C -1.145175 2.148749 0.000162<br>H 0.656638 3.373508 0.000657<br>H -1.930297 2.892160 0.000861                                                                     |
| A2R5-P-4  | C -2.429230 0.065768 -0.000146<br>C -1.258019 0.794075 0.000117                                                                                                                                                                                                                                                                                                                                                                                                                                                                                                                                                                                                                                                             |           |                                                                                                                                                                                                                                                                                                                                                                                                                                                                                                                                                                                                                                                                                                                               |

|   |           |           |           |  |  |
|---|-----------|-----------|-----------|--|--|
| C | -0.026180 | 0.096243  | 0.000018  |  |  |
| C | 0.115775  | -1.299195 | -0.000219 |  |  |
| C | -1.124703 | -1.964356 | -0.000421 |  |  |
| C | -2.348030 | -1.364570 | -0.000422 |  |  |
| H | -3.404968 | 0.540946  | 0.000005  |  |  |
| C | 1.055840  | 1.008993  | 0.000191  |  |  |
| C | 1.447955  | -1.801045 | -0.000212 |  |  |
| H | -3.261234 | -1.950095 | -0.000517 |  |  |
| C | 2.509896  | -0.917226 | 0.000006  |  |  |
| C | 2.335152  | 0.495656  | 0.000228  |  |  |
| H | 1.623120  | -2.870363 | -0.000387 |  |  |
| H | 3.519997  | -1.311397 | -0.000044 |  |  |
| H | 3.208999  | 1.138681  | 0.000266  |  |  |
| C | 0.449297  | 2.350522  | -0.000025 |  |  |
| C | -0.905785 | 2.224069  | 0.000817  |  |  |
| H | 1.000515  | 3.280900  | -0.000165 |  |  |
| H | -1.618226 | 3.037717  | 0.001247  |  |  |
